# Supplementary material for: Quantitative Trait Locus Mapping of Melanization in the Plant Pathogenic Fungus Zymoseptoria tritici
Source: PubMed Central journal article supplement (PMC4267946; doi:10.1534/g3.114.015289), 2014-10-29
Supplement: supp_g3.114.015289_015289SI.pdf [file supp_g3.114.015289_015289SI.pdf]

**Quantitative Trait Locus Mapping of Melanization in the Plant Pathogenic Fungus**

***Zymoseptoria tritici***

Mark H. Lendenmann\*, Daniel Croll\*, Ethan L. Stewart\* and Bruce A. McDonald\*

\*Institute of Integrative Biology, Plant Pathology, ETH Zürich, 8092 Zürich, Switzerland

DOI: [10.1534/g3.114.015289](https://doi.org/10.1534/g3.114.015289)

**Table S1 BioProject and sample accession numbers for the quality filter retained progeny used in the QTL analysis for each of the two crosses.**

| Cross     | Retained progeny for QTL analysis | NCBI BioProject accession | NCBI SRA sample accession |
|-----------|-----------------------------------|---------------------------|---------------------------|
| 3D1 x 3D7 | 1.1                               | PRJNA256988               | SRS670337                 |
| 3D1 x 3D7 | 1.2                               | PRJNA256988               | SRS670339                 |
| 3D1 x 3D7 | 10.1                              | PRJNA256988               | SRS670338                 |
| 3D1 x 3D7 | 100.1                             | PRJNA256988               | SRS670340                 |
| 3D1 x 3D7 | 100.2                             | PRJNA256988               | SRS670342                 |
| 3D1 x 3D7 | 101.2                             | PRJNA256988               | SRS670344                 |
| 3D1 x 3D7 | 102.1                             | PRJNA256988               | SRS670345                 |
| 3D1 x 3D7 | 102.2                             | PRJNA256988               | SRS670346                 |
| 3D1 x 3D7 | 103.1                             | PRJNA256988               | SRS670347                 |
| 3D1 x 3D7 | 104.1                             | PRJNA256988               | SRS670349                 |
| 3D1 x 3D7 | 104.2                             | PRJNA256988               | SRS670350                 |
| 3D1 x 3D7 | 105.1                             | PRJNA256988               | SRS670351                 |
| 3D1 x 3D7 | 105.2                             | PRJNA256988               | SRS670352                 |
| 3D1 x 3D7 | 106.1                             | PRJNA256988               | SRS670353                 |
| 3D1 x 3D7 | 106.2                             | PRJNA256988               | SRS670355                 |
| 3D1 x 3D7 | 107.1                             | PRJNA256988               | SRS670354                 |
| 3D1 x 3D7 | 108.1                             | PRJNA256988               | SRS670356                 |
| 3D1 x 3D7 | 108.2                             | PRJNA256988               | SRS670358                 |
| 3D1 x 3D7 | 109.1                             | PRJNA256988               | SRS670359                 |
| 3D1 x 3D7 | 109.2                             | PRJNA256988               | SRS670360                 |
| 3D1 x 3D7 | 11.1                              | PRJNA256988               | SRS670361                 |
| 3D1 x 3D7 | 11.2                              | PRJNA256988               | SRS670362                 |
| 3D1 x 3D7 | 110.1                             | PRJNA256988               | SRS670363                 |
| 3D1 x 3D7 | 110.2                             | PRJNA256988               | SRS670365                 |
| 3D1 x 3D7 | 111.2                             | PRJNA256988               | SRS670367                 |
| 3D1 x 3D7 | 112.1                             | PRJNA256988               | SRS670366                 |
| 3D1 x 3D7 | 113.1                             | PRJNA256988               | SRS670369                 |
| 3D1 x 3D7 | 113.2                             | PRJNA256988               | SRS670370                 |
| 3D1 x 3D7 | 114.1                             | PRJNA256988               | SRS670371                 |
| 3D1 x 3D7 | 114.2                             | PRJNA256988               | SRS670372                 |
| 3D1 x 3D7 | 115.1                             | PRJNA256988               | SRS670373                 |
| 3D1 x 3D7 | 116.1                             | PRJNA256988               | SRS670375                 |
| 3D1 x 3D7 | 116.2                             | PRJNA256988               | SRS670376                 |
| 3D1 x 3D7 | 117.1                             | PRJNA256988               | SRS670378                 |
| 3D1 x 3D7 | 117.2                             | PRJNA256988               | SRS670377                 |
| 3D1 x 3D7 | 118.1                             | PRJNA256988               | SRS670380                 |
| 3D1 x 3D7 | 118.2                             | PRJNA256988               | SRS670379                 |
| 3D1 x 3D7 | 119.1                             | PRJNA256988               | SRS670381                 |
| 3D1 x 3D7 | 119.2                             | PRJNA256988               | SRS670382                 |

|           |       |             |           |
|-----------|-------|-------------|-----------|
| 3D1 x 3D7 | 12.1  | PRJNA256988 | SRS670383 |
| 3D1 x 3D7 | 120.1 | PRJNA256988 | SRS670385 |
| 3D1 x 3D7 | 120.2 | PRJNA256988 | SRS670386 |
| 3D1 x 3D7 | 121.2 | PRJNA256988 | SRS670388 |
| 3D1 x 3D7 | 122.1 | PRJNA256988 | SRS670389 |
| 3D1 x 3D7 | 123.1 | PRJNA256988 | SRS670391 |
| 3D1 x 3D7 | 125.1 | PRJNA256988 | SRS670395 |
| 3D1 x 3D7 | 126.1 | PRJNA256988 | SRS670397 |
| 3D1 x 3D7 | 127.1 | PRJNA256988 | SRS670398 |
| 3D1 x 3D7 | 127.2 | PRJNA256988 | SRS670399 |
| 3D1 x 3D7 | 128.1 | PRJNA256988 | SRS670400 |
| 3D1 x 3D7 | 128.2 | PRJNA256988 | SRS670401 |
| 3D1 x 3D7 | 129.2 | PRJNA256988 | SRS670403 |
| 3D1 x 3D7 | 13.1  | PRJNA256988 | SRS670404 |
| 3D1 x 3D7 | 130.1 | PRJNA256988 | SRS670406 |
| 3D1 x 3D7 | 131.1 | PRJNA256988 | SRS670408 |
| 3D1 x 3D7 | 133.1 | PRJNA256988 | SRS670413 |
| 3D1 x 3D7 | 134.1 | PRJNA256988 | SRS670414 |
| 3D1 x 3D7 | 135.2 | PRJNA256988 | SRS670418 |
| 3D1 x 3D7 | 136.1 | PRJNA256988 | SRS670417 |
| 3D1 x 3D7 | 137.1 | PRJNA256988 | SRS670419 |
| 3D1 x 3D7 | 137.2 | PRJNA256988 | SRS670420 |
| 3D1 x 3D7 | 138.1 | PRJNA256988 | SRS670421 |
| 3D1 x 3D7 | 139.2 | PRJNA256988 | SRS670423 |
| 3D1 x 3D7 | 14.1  | PRJNA256988 | SRS670425 |
| 3D1 x 3D7 | 141.1 | PRJNA256988 | SRS670429 |
| 3D1 x 3D7 | 142.1 | PRJNA256988 | SRS670430 |
| 3D1 x 3D7 | 142.2 | PRJNA256988 | SRS670431 |
| 3D1 x 3D7 | 143.1 | PRJNA256988 | SRS670432 |
| 3D1 x 3D7 | 144.1 | PRJNA256988 | SRS670434 |
| 3D1 x 3D7 | 145.1 | PRJNA256988 | SRS670437 |
| 3D1 x 3D7 | 145.2 | PRJNA256988 | SRS670436 |
| 3D1 x 3D7 | 146.1 | PRJNA256988 | SRS670438 |
| 3D1 x 3D7 | 146.2 | PRJNA256988 | SRS670440 |
| 3D1 x 3D7 | 147.1 | PRJNA256988 | SRS670439 |
| 3D1 x 3D7 | 148.1 | PRJNA256988 | SRS670443 |
| 3D1 x 3D7 | 149.1 | PRJNA256988 | SRS670444 |
| 3D1 x 3D7 | 149.2 | PRJNA256988 | SRS670445 |
| 3D1 x 3D7 | 15.1  | PRJNA256988 | SRS670446 |
| 3D1 x 3D7 | 15.2  | PRJNA256988 | SRS670447 |
| 3D1 x 3D7 | 150.1 | PRJNA256988 | SRS670448 |
| 3D1 x 3D7 | 150.2 | PRJNA256988 | SRS670449 |
| 3D1 x 3D7 | 151.1 | PRJNA256988 | SRS670452 |
| 3D1 x 3D7 | 152.1 | PRJNA256988 | SRS670451 |

|           |       |             |           |
|-----------|-------|-------------|-----------|
| 3D1 x 3D7 | 152.2 | PRJNA256988 | SRS670453 |
| 3D1 x 3D7 | 154.1 | PRJNA256988 | SRS670456 |
| 3D1 x 3D7 | 154.2 | PRJNA256988 | SRS670458 |
| 3D1 x 3D7 | 155.1 | PRJNA256988 | SRS670457 |
| 3D1 x 3D7 | 156.1 | PRJNA256988 | SRS670461 |
| 3D1 x 3D7 | 157.1 | PRJNA256988 | SRS670462 |
| 3D1 x 3D7 | 158.1 | PRJNA256988 | SRS670464 |
| 3D1 x 3D7 | 158.2 | PRJNA256988 | SRS670465 |
| 3D1 x 3D7 | 159.1 | PRJNA256988 | SRS670466 |
| 3D1 x 3D7 | 16.1  | PRJNA256988 | SRS670468 |
| 3D1 x 3D7 | 160.1 | PRJNA256988 | SRS670470 |
| 3D1 x 3D7 | 160.2 | PRJNA256988 | SRS670471 |
| 3D1 x 3D7 | 161.1 | PRJNA256988 | SRS670472 |
| 3D1 x 3D7 | 161.2 | PRJNA256988 | SRS670473 |
| 3D1 x 3D7 | 162.1 | PRJNA256988 | SRS670474 |
| 3D1 x 3D7 | 162.2 | PRJNA256988 | SRS670475 |
| 3D1 x 3D7 | 163.1 | PRJNA256988 | SRS670476 |
| 3D1 x 3D7 | 164.1 | PRJNA256988 | SRS670478 |
| 3D1 x 3D7 | 164.2 | PRJNA256988 | SRS670479 |
| 3D1 x 3D7 | 165.1 | PRJNA256988 | SRS670480 |
| 3D1 x 3D7 | 165.2 | PRJNA256988 | SRS670481 |
| 3D1 x 3D7 | 166.1 | PRJNA256988 | SRS670482 |
| 3D1 x 3D7 | 167.1 | PRJNA256988 | SRS670484 |
| 3D1 x 3D7 | 167.2 | PRJNA256988 | SRS670485 |
| 3D1 x 3D7 | 168.1 | PRJNA256988 | SRS670486 |
| 3D1 x 3D7 | 169.1 | PRJNA256988 | SRS670487 |
| 3D1 x 3D7 | 169.2 | PRJNA256988 | SRS670488 |
| 3D1 x 3D7 | 17.2  | PRJNA256988 | SRS670492 |
| 3D1 x 3D7 | 170.1 | PRJNA256988 | SRS670491 |
| 3D1 x 3D7 | 170.2 | PRJNA256988 | SRS670493 |
| 3D1 x 3D7 | 171.1 | PRJNA256988 | SRS670494 |
| 3D1 x 3D7 | 172.1 | PRJNA256988 | SRS670496 |
| 3D1 x 3D7 | 173.1 | PRJNA256988 | SRS670498 |
| 3D1 x 3D7 | 174.1 | PRJNA256988 | SRS670499 |
| 3D1 x 3D7 | 174.2 | PRJNA256988 | SRS670501 |
| 3D1 x 3D7 | 175.1 | PRJNA256988 | SRS670502 |
| 3D1 x 3D7 | 176.2 | PRJNA256988 | SRS670505 |
| 3D1 x 3D7 | 177.2 | PRJNA256988 | SRS670507 |
| 3D1 x 3D7 | 178.1 | PRJNA256988 | SRS670508 |
| 3D1 x 3D7 | 179.1 | PRJNA256988 | SRS670510 |
| 3D1 x 3D7 | 179.2 | PRJNA256988 | SRS670511 |
| 3D1 x 3D7 | 18.1  | PRJNA256988 | SRS670512 |
| 3D1 x 3D7 | 18.2  | PRJNA256988 | SRS670513 |

|           |       |             |           |
|-----------|-------|-------------|-----------|
| 3D1 x 3D7 | 180.1 | PRJNA256988 | SRS670514 |
| 3D1 x 3D7 | 180.2 | PRJNA256988 | SRS670515 |
| 3D1 x 3D7 | 181.1 | PRJNA256988 | SRS670516 |
| 3D1 x 3D7 | 181.2 | PRJNA256988 | SRS670518 |
| 3D1 x 3D7 | 182.1 | PRJNA256988 | SRS670517 |
| 3D1 x 3D7 | 183.1 | PRJNA256988 | SRS670520 |
| 3D1 x 3D7 | 184.1 | PRJNA256988 | SRS670521 |
| 3D1 x 3D7 | 185.1 | PRJNA256988 | SRS670522 |
| 3D1 x 3D7 | 19.1  | PRJNA256988 | SRS670524 |
| 3D1 x 3D7 | 19.2  | PRJNA256988 | SRS670525 |
| 3D1 x 3D7 | 2.1   | PRJNA256988 | SRS670526 |
| 3D1 x 3D7 | 20.1  | PRJNA256988 | SRS670528 |
| 3D1 x 3D7 | 20.2  | PRJNA256988 | SRS670529 |
| 3D1 x 3D7 | 21.1  | PRJNA256988 | SRS670530 |
| 3D1 x 3D7 | 21.2  | PRJNA256988 | SRS670531 |
| 3D1 x 3D7 | 22.1  | PRJNA256988 | SRS670532 |
| 3D1 x 3D7 | 22.2  | PRJNA256988 | SRS670533 |
| 3D1 x 3D7 | 23.1  | PRJNA256988 | SRS670534 |
| 3D1 x 3D7 | 23.2  | PRJNA256988 | SRS670536 |
| 3D1 x 3D7 | 24.1  | PRJNA256988 | SRS670535 |
| 3D1 x 3D7 | 24.2  | PRJNA256988 | SRS670537 |
| 3D1 x 3D7 | 25.1  | PRJNA256988 | SRS670538 |
| 3D1 x 3D7 | 26.1  | PRJNA256988 | SRS670540 |
| 3D1 x 3D7 | 26.2  | PRJNA256988 | SRS670541 |
| 3D1 x 3D7 | 27.1  | PRJNA256988 | SRS670542 |
| 3D1 x 3D7 | 28.1  | PRJNA256988 | SRS670544 |
| 3D1 x 3D7 | 29.1  | PRJNA256988 | SRS670545 |
| 3D1 x 3D7 | 3.1   | PRJNA256988 | SRS670547 |
| 3D1 x 3D7 | 3.2   | PRJNA256988 | SRS670548 |
| 3D1 x 3D7 | 30.1  | PRJNA256988 | SRS670550 |
| 3D1 x 3D7 | 31.1  | PRJNA256988 | SRS670551 |
| 3D1 x 3D7 | 32.1  | PRJNA256988 | SRS670553 |
| 3D1 x 3D7 | 33.1  | PRJNA256988 | SRS670555 |
| 3D1 x 3D7 | 34.1  | PRJNA256988 | SRS670557 |
| 3D1 x 3D7 | 34.2  | PRJNA256988 | SRS670559 |
| 3D1 x 3D7 | 35.1  | PRJNA256988 | SRS670558 |
| 3D1 x 3D7 | 35.2  | PRJNA256988 | SRS670560 |
| 3D1 x 3D7 | 36.1  | PRJNA256988 | SRS670561 |
| 3D1 x 3D7 | 37.1  | PRJNA256988 | SRS670564 |
| 3D1 x 3D7 | 37.2  | PRJNA256988 | SRS670563 |
| 3D1 x 3D7 | 38.1  | PRJNA256988 | SRS670565 |
| 3D1 x 3D7 | 39.1  | PRJNA256988 | SRS670567 |
| 3D1 x 3D7 | 4.1   | PRJNA256988 | SRS670569 |
| 3D1 x 3D7 | 4.2   | PRJNA256988 | SRS670570 |

|           |      |             |           |
|-----------|------|-------------|-----------|
| 3D1 x 3D7 | 40.1 | PRJNA256988 | SRS670572 |
| 3D1 x 3D7 | 40.2 | PRJNA256988 | SRS670571 |
| 3D1 x 3D7 | 41.1 | PRJNA256988 | SRS670573 |
| 3D1 x 3D7 | 41.2 | PRJNA256988 | SRS670575 |
| 3D1 x 3D7 | 42.1 | PRJNA256988 | SRS670574 |
| 3D1 x 3D7 | 42.2 | PRJNA256988 | SRS670576 |
| 3D1 x 3D7 | 43.1 | PRJNA256988 | SRS670577 |
| 3D1 x 3D7 | 44.1 | PRJNA256988 | SRS670580 |
| 3D1 x 3D7 | 45.1 | PRJNA256988 | SRS670581 |
| 3D1 x 3D7 | 46.1 | PRJNA256988 | SRS670583 |
| 3D1 x 3D7 | 46.2 | PRJNA256988 | SRS670584 |
| 3D1 x 3D7 | 47.1 | PRJNA256988 | SRS670585 |
| 3D1 x 3D7 | 48.1 | PRJNA256988 | SRS670587 |
| 3D1 x 3D7 | 48.2 | PRJNA256988 | SRS670588 |
| 3D1 x 3D7 | 49.1 | PRJNA256988 | SRS670589 |
| 3D1 x 3D7 | 49.2 | PRJNA256988 | SRS670590 |
| 3D1 x 3D7 | 5.1  | PRJNA256988 | SRS670591 |
| 3D1 x 3D7 | 5.2  | PRJNA256988 | SRS670592 |
| 3D1 x 3D7 | 50.1 | PRJNA256988 | SRS670593 |
| 3D1 x 3D7 | 51.1 | PRJNA256988 | SRS670596 |
| 3D1 x 3D7 | 51.2 | PRJNA256988 | SRS670595 |
| 3D1 x 3D7 | 52.1 | PRJNA256988 | SRS670597 |
| 3D1 x 3D7 | 52.2 | PRJNA256988 | SRS670598 |
| 3D1 x 3D7 | 53.2 | PRJNA256988 | SRS670600 |
| 3D1 x 3D7 | 54.1 | PRJNA256988 | SRS670601 |
| 3D1 x 3D7 | 55.1 | PRJNA256988 | SRS670604 |
| 3D1 x 3D7 | 55.2 | PRJNA256988 | SRS670603 |
| 3D1 x 3D7 | 56.1 | PRJNA256988 | SRS670605 |
| 3D1 x 3D7 | 56.2 | PRJNA256988 | SRS670606 |
| 3D1 x 3D7 | 57.1 | PRJNA256988 | SRS670607 |
| 3D1 x 3D7 | 57.2 | PRJNA256988 | SRS670609 |
| 3D1 x 3D7 | 58.1 | PRJNA256988 | SRS670608 |
| 3D1 x 3D7 | 59.1 | PRJNA256988 | SRS670611 |
| 3D1 x 3D7 | 59.2 | PRJNA256988 | SRS670612 |
| 3D1 x 3D7 | 6.1  | PRJNA256988 | SRS670614 |
| 3D1 x 3D7 | 60.2 | PRJNA256988 | SRS670613 |
| 3D1 x 3D7 | 61.1 | PRJNA256988 | SRS670615 |
| 3D1 x 3D7 | 62.1 | PRJNA256988 | SRS670617 |
| 3D1 x 3D7 | 62.2 | PRJNA256988 | SRS670618 |
| 3D1 x 3D7 | 63.1 | PRJNA256988 | SRS670619 |
| 3D1 x 3D7 | 64.1 | PRJNA256988 | SRS670621 |
| 3D1 x 3D7 | 65.1 | PRJNA256988 | SRS670623 |
| 3D1 x 3D7 | 66.1 | PRJNA256988 | SRS670624 |

|           |      |             |           |
|-----------|------|-------------|-----------|
| 3D1 x 3D7 | 67.1 | PRJNA256988 | SRS670626 |
| 3D1 x 3D7 | 68.1 | PRJNA256988 | SRS670629 |
| 3D1 x 3D7 | 68.2 | PRJNA256988 | SRS670630 |
| 3D1 x 3D7 | 69.1 | PRJNA256988 | SRS670631 |
| 3D1 x 3D7 | 69.2 | PRJNA256988 | SRS670633 |
| 3D1 x 3D7 | 7.1  | PRJNA256988 | SRS670632 |
| 3D1 x 3D7 | 70.1 | PRJNA256988 | SRS670635 |
| 3D1 x 3D7 | 71.2 | PRJNA256988 | SRS670636 |
| 3D1 x 3D7 | 72.1 | PRJNA256988 | SRS670637 |
| 3D1 x 3D7 | 72.2 | PRJNA256988 | SRS670638 |
| 3D1 x 3D7 | 73.1 | PRJNA256988 | SRS670639 |
| 3D1 x 3D7 | 74.1 | PRJNA256988 | SRS670641 |
| 3D1 x 3D7 | 75.1 | PRJNA256988 | SRS670644 |
| 3D1 x 3D7 | 75.2 | PRJNA256988 | SRS670643 |
| 3D1 x 3D7 | 76.1 | PRJNA256988 | SRS670646 |
| 3D1 x 3D7 | 76.2 | PRJNA256988 | SRS670645 |
| 3D1 x 3D7 | 77.1 | PRJNA256988 | SRS670647 |
| 3D1 x 3D7 | 78.1 | PRJNA256988 | SRS670650 |
| 3D1 x 3D7 | 79.1 | PRJNA256988 | SRS670651 |
| 3D1 x 3D7 | 8.1  | PRJNA256988 | SRS670653 |
| 3D1 x 3D7 | 8.2  | PRJNA256988 | SRS670654 |
| 3D1 x 3D7 | 80.1 | PRJNA256988 | SRS670655 |
| 3D1 x 3D7 | 80.2 | PRJNA256988 | SRS670656 |
| 3D1 x 3D7 | 82.1 | PRJNA256988 | SRS670659 |
| 3D1 x 3D7 | 82.2 | PRJNA256988 | SRS670660 |
| 3D1 x 3D7 | 83.1 | PRJNA256988 | SRS670661 |
| 3D1 x 3D7 | 83.2 | PRJNA256988 | SRS670662 |
| 3D1 x 3D7 | 84.1 | PRJNA256988 | SRS670663 |
| 3D1 x 3D7 | 84.2 | PRJNA256988 | SRS670664 |
| 3D1 x 3D7 | 86.2 | PRJNA256988 | SRS670668 |
| 3D1 x 3D7 | 87.1 | PRJNA256988 | SRS670669 |
| 3D1 x 3D7 | 88.1 | PRJNA256988 | SRS670672 |
| 3D1 x 3D7 | 89.1 | PRJNA256988 | SRS670674 |
| 3D1 x 3D7 | 89.2 | PRJNA256988 | SRS670673 |
| 3D1 x 3D7 | 9.1  | PRJNA256988 | SRS670675 |
| 3D1 x 3D7 | 90.1 | PRJNA256988 | SRS670677 |
| 3D1 x 3D7 | 91.2 | PRJNA256988 | SRS670679 |
| 3D1 x 3D7 | 92.1 | PRJNA256988 | SRS670680 |
| 3D1 x 3D7 | 93.1 | PRJNA256988 | SRS670682 |
| 3D1 x 3D7 | 93.2 | PRJNA256988 | SRS670683 |
| 3D1 x 3D7 | 94.1 | PRJNA256988 | SRS670685 |
| 3D1 x 3D7 | 94.2 | PRJNA256988 | SRS670684 |
| 3D1 x 3D7 | 95.1 | PRJNA256988 | SRS670686 |
| 3D1 x 3D7 | 95.2 | PRJNA256988 | SRS670687 |

|           |       |             |           |
|-----------|-------|-------------|-----------|
| 3D1 x 3D7 | 96.1  | PRJNA256988 | SRS670688 |
| 3D1 x 3D7 | 96.2  | PRJNA256988 | SRS670689 |
| 3D1 x 3D7 | 97.1  | PRJNA256988 | SRS670690 |
| 3D1 x 3D7 | 97.2  | PRJNA256988 | SRS670691 |
| 3D1 x 3D7 | 98.1  | PRJNA256988 | SRS670693 |
| 3D1 x 3D7 | 99.1  | PRJNA256988 | SRS670694 |
| 1A5 x 1E4 | A1.1  | PRJNA256991 | SRS670696 |
| 1A5 x 1E4 | A10.1 | PRJNA256991 | SRS670697 |
| 1A5 x 1E4 | A11.1 | PRJNA256991 | SRS670699 |
| 1A5 x 1E4 | A11.2 | PRJNA256991 | SRS670700 |
| 1A5 x 1E4 | A12.2 | PRJNA256991 | SRS670701 |
| 1A5 x 1E4 | A13.1 | PRJNA256991 | SRS670702 |
| 1A5 x 1E4 | A13.2 | PRJNA256991 | SRS670704 |
| 1A5 x 1E4 | A14.1 | PRJNA256991 | SRS670705 |
| 1A5 x 1E4 | A14.2 | PRJNA256991 | SRS670706 |
| 1A5 x 1E4 | A16.1 | PRJNA256991 | SRS670707 |
| 1A5 x 1E4 | A16.2 | PRJNA256991 | SRS670708 |
| 1A5 x 1E4 | A17.1 | PRJNA256991 | SRS670709 |
| 1A5 x 1E4 | A18.1 | PRJNA256991 | SRS670711 |
| 1A5 x 1E4 | A18.2 | PRJNA256991 | SRS670712 |
| 1A5 x 1E4 | A19.1 | PRJNA256991 | SRS670713 |
| 1A5 x 1E4 | A2.2  | PRJNA256991 | SRS670716 |
| 1A5 x 1E4 | A21.1 | PRJNA256991 | SRS670717 |
| 1A5 x 1E4 | A21.2 | PRJNA256991 | SRS670718 |
| 1A5 x 1E4 | A22.1 | PRJNA256991 | SRS670720 |
| 1A5 x 1E4 | A22.2 | PRJNA256991 | SRS670719 |
| 1A5 x 1E4 | A23.1 | PRJNA256991 | SRS670722 |
| 1A5 x 1E4 | A23.2 | PRJNA256991 | SRS670721 |
| 1A5 x 1E4 | A24.1 | PRJNA256991 | SRS670723 |
| 1A5 x 1E4 | A24.2 | PRJNA256991 | SRS670724 |
| 1A5 x 1E4 | A25.1 | PRJNA256991 | SRS670725 |
| 1A5 x 1E4 | A25.2 | PRJNA256991 | SRS670726 |
| 1A5 x 1E4 | A26.1 | PRJNA256991 | SRS670727 |
| 1A5 x 1E4 | A26.2 | PRJNA256991 | SRS670728 |
| 1A5 x 1E4 | A28.1 | PRJNA256991 | SRS670729 |
| 1A5 x 1E4 | A29.1 | PRJNA256991 | SRS670731 |
| 1A5 x 1E4 | A3.1  | PRJNA256991 | SRS670733 |
| 1A5 x 1E4 | A3.2  | PRJNA256991 | SRS670734 |
| 1A5 x 1E4 | A30.1 | PRJNA256991 | SRS670735 |
| 1A5 x 1E4 | A30.2 | PRJNA256991 | SRS670736 |
| 1A5 x 1E4 | A31.1 | PRJNA256991 | SRS670738 |
| 1A5 x 1E4 | A32.1 | PRJNA256991 | SRS670739 |
| 1A5 x 1E4 | A33.1 | PRJNA256991 | SRS670741 |



|           |       |             |           |
|-----------|-------|-------------|-----------|
| 1A5 x 1E4 | A33.2 | PRJNA256991 | SRS670742 |
| 1A5 x 1E4 | A35.2 | PRJNA256991 | SRS670744 |
| 1A5 x 1E4 | A36.1 | PRJNA256991 | SRS670745 |
| 1A5 x 1E4 | A37.1 | PRJNA256991 | SRS670747 |
| 1A5 x 1E4 | A38.1 | PRJNA256991 | SRS670749 |
| 1A5 x 1E4 | A39.1 | PRJNA256991 | SRS670751 |
| 1A5 x 1E4 | A39.2 | PRJNA256991 | SRS670752 |
| 1A5 x 1E4 | A4.1  | PRJNA256991 | SRS670753 |
| 1A5 x 1E4 | A40.1 | PRJNA256991 | SRS670755 |
| 1A5 x 1E4 | A40.2 | PRJNA256991 | SRS670756 |
| 1A5 x 1E4 | A41.1 | PRJNA256991 | SRS670757 |
| 1A5 x 1E4 | A42.1 | PRJNA256991 | SRS670760 |
| 1A5 x 1E4 | A42.2 | PRJNA256991 | SRS670759 |
| 1A5 x 1E4 | A43.1 | PRJNA256991 | SRS670762 |
| 1A5 x 1E4 | A43.2 | PRJNA256991 | SRS670761 |
| 1A5 x 1E4 | A44.1 | PRJNA256991 | SRS670763 |
| 1A5 x 1E4 | A44.2 | PRJNA256991 | SRS670765 |
| 1A5 x 1E4 | A45.1 | PRJNA256991 | SRS670766 |
| 1A5 x 1E4 | A45.2 | PRJNA256991 | SRS670764 |
| 1A5 x 1E4 | A46.1 | PRJNA256991 | SRS670767 |
| 1A5 x 1E4 | A46.2 | PRJNA256991 | SRS670768 |
| 1A5 x 1E4 | A47.1 | PRJNA256991 | SRS670769 |
| 1A5 x 1E4 | A47.2 | PRJNA256991 | SRS670770 |
| 1A5 x 1E4 | A48.1 | PRJNA256991 | SRS670771 |
| 1A5 x 1E4 | A49.1 | PRJNA256991 | SRS670773 |
| 1A5 x 1E4 | A5.1  | PRJNA256991 | SRS670775 |
| 1A5 x 1E4 | A50.2 | PRJNA256991 | SRS670778 |
| 1A5 x 1E4 | A51.2 | PRJNA256991 | SRS670779 |
| 1A5 x 1E4 | A53.2 | PRJNA256991 | SRS670781 |
| 1A5 x 1E4 | A54.1 | PRJNA256991 | SRS670780 |
| 1A5 x 1E4 | A54.2 | PRJNA256991 | SRS670782 |
| 1A5 x 1E4 | A55.1 | PRJNA256991 | SRS670783 |
| 1A5 x 1E4 | A55.2 | PRJNA256991 | SRS670784 |
| 1A5 x 1E4 | A57.1 | PRJNA256991 | SRS670785 |
| 1A5 x 1E4 | A59.1 | PRJNA256991 | SRS670787 |
| 1A5 x 1E4 | A59.2 | PRJNA256991 | SRS670788 |
| 1A5 x 1E4 | A6.1  | PRJNA256991 | SRS670789 |
| 1A5 x 1E4 | A60.1 | PRJNA256991 | SRS670791 |
| 1A5 x 1E4 | A60.2 | PRJNA256991 | SRS670792 |
| 1A5 x 1E4 | A62.1 | PRJNA256991 | SRS670793 |
| 1A5 x 1E4 | A62.2 | PRJNA256991 | SRS670794 |
| 1A5 x 1E4 | A63.1 | PRJNA256991 | SRS670795 |
| 1A5 x 1E4 | A63.2 | PRJNA256991 | SRS670796 |
| 1A5 x 1E4 | A64.1 | PRJNA256991 | SRS670797 |

|           |       |             |           |
|-----------|-------|-------------|-----------|
| 1A5 x 1E4 | A66.1 | PRJNA256991 | SRS670799 |
| 1A5 x 1E4 | A66.2 | PRJNA256991 | SRS670800 |
| 1A5 x 1E4 | A8.1  | PRJNA256991 | SRS670801 |
| 1A5 x 1E4 | A9.1  | PRJNA256991 | SRS670803 |
| 1A5 x 1E4 | A9.2  | PRJNA256991 | SRS670804 |
| 1A5 x 1E4 | B1.1  | PRJNA256991 | SRS670805 |
| 1A5 x 1E4 | B1.3  | PRJNA256991 | SRS670807 |
| 1A5 x 1E4 | B10.1 | PRJNA256991 | SRS670808 |
| 1A5 x 1E4 | B10.2 | PRJNA256991 | SRS670809 |
| 1A5 x 1E4 | B11.1 | PRJNA256991 | SRS670811 |
| 1A5 x 1E4 | B12.1 | PRJNA256991 | SRS670812 |
| 1A5 x 1E4 | B13.2 | PRJNA256991 | SRS670815 |
| 1A5 x 1E4 | B14.1 | PRJNA256991 | SRS670816 |
| 1A5 x 1E4 | B15.1 | PRJNA256991 | SRS670818 |
| 1A5 x 1E4 | B16.1 | PRJNA256991 | SRS670821 |
| 1A5 x 1E4 | B16.2 | PRJNA256991 | SRS670820 |
| 1A5 x 1E4 | B17.1 | PRJNA256991 | SRS670823 |
| 1A5 x 1E4 | B17.2 | PRJNA256991 | SRS670824 |
| 1A5 x 1E4 | B18.1 | PRJNA256991 | SRS670822 |
| 1A5 x 1E4 | B18.2 | PRJNA256991 | SRS670826 |
| 1A5 x 1E4 | B19.1 | PRJNA256991 | SRS670827 |
| 1A5 x 1E4 | B19.2 | PRJNA256991 | SRS670825 |
| 1A5 x 1E4 | B20.1 | PRJNA256991 | SRS670828 |
| 1A5 x 1E4 | B20.2 | PRJNA256991 | SRS670829 |
| 1A5 x 1E4 | B21.1 | PRJNA256991 | SRS670830 |
| 1A5 x 1E4 | B22.1 | PRJNA256991 | SRS670831 |
| 1A5 x 1E4 | B22.2 | PRJNA256991 | SRS670832 |
| 1A5 x 1E4 | B23.1 | PRJNA256991 | SRS670833 |
| 1A5 x 1E4 | B24.1 | PRJNA256991 | SRS670835 |
| 1A5 x 1E4 | B24.2 | PRJNA256991 | SRS670836 |
| 1A5 x 1E4 | B25.1 | PRJNA256991 | SRS670837 |
| 1A5 x 1E4 | B26.1 | PRJNA256991 | SRS670839 |
| 1A5 x 1E4 | B27.1 | PRJNA256991 | SRS670840 |
| 1A5 x 1E4 | B28.1 | PRJNA256991 | SRS670842 |
| 1A5 x 1E4 | B28.2 | PRJNA256991 | SRS670843 |
| 1A5 x 1E4 | B29.1 | PRJNA256991 | SRS670844 |
| 1A5 x 1E4 | B3.1  | PRJNA256991 | SRS670846 |
| 1A5 x 1E4 | B30.1 | PRJNA256991 | SRS670847 |
| 1A5 x 1E4 | B31.1 | PRJNA256991 | SRS670849 |
| 1A5 x 1E4 | B31.2 | PRJNA256991 | SRS670850 |
| 1A5 x 1E4 | B32.1 | PRJNA256991 | SRS670852 |
| 1A5 x 1E4 | B32.2 | PRJNA256991 | SRS670851 |
| 1A5 x 1E4 | B33.1 | PRJNA256991 | SRS670853 |

|           |       |             |           |
|-----------|-------|-------------|-----------|
| 1A5 x 1E4 | B33.2 | PRJNA256991 | SRS670854 |
| 1A5 x 1E4 | B34.2 | PRJNA256991 | SRS670857 |
| 1A5 x 1E4 | B35.1 | PRJNA256991 | SRS670856 |
| 1A5 x 1E4 | B35.2 | PRJNA256991 | SRS670858 |
| 1A5 x 1E4 | B37.1 | PRJNA256991 | SRS670859 |
| 1A5 x 1E4 | B37.3 | PRJNA256991 | SRS670861 |
| 1A5 x 1E4 | B38.1 | PRJNA256991 | SRS670862 |
| 1A5 x 1E4 | B39.1 | PRJNA256991 | SRS670864 |
| 1A5 x 1E4 | B39.2 | PRJNA256991 | SRS670865 |
| 1A5 x 1E4 | B4.1  | PRJNA256991 | SRS670867 |
| 1A5 x 1E4 | B4.2  | PRJNA256991 | SRS670868 |
| 1A5 x 1E4 | B40.2 | PRJNA256991 | SRS670869 |
| 1A5 x 1E4 | B41.1 | PRJNA256991 | SRS670870 |
| 1A5 x 1E4 | B42.1 | PRJNA256991 | SRS670871 |
| 1A5 x 1E4 | B42.2 | PRJNA256991 | SRS670872 |
| 1A5 x 1E4 | B42.3 | PRJNA256991 | SRS670873 |
| 1A5 x 1E4 | B43.1 | PRJNA256991 | SRS670874 |
| 1A5 x 1E4 | B44.1 | PRJNA256991 | SRS670876 |
| 1A5 x 1E4 | B45.1 | PRJNA256991 | SRS670878 |
| 1A5 x 1E4 | B45.2 | PRJNA256991 | SRS670879 |
| 1A5 x 1E4 | B46.1 | PRJNA256991 | SRS670880 |
| 1A5 x 1E4 | B46.2 | PRJNA256991 | SRS670881 |
| 1A5 x 1E4 | B48.1 | PRJNA256991 | SRS670883 |
| 1A5 x 1E4 | B48.2 | PRJNA256991 | SRS670884 |
| 1A5 x 1E4 | B49.1 | PRJNA256991 | SRS670885 |
| 1A5 x 1E4 | B50.1 | PRJNA256991 | SRS670886 |
| 1A5 x 1E4 | B50.2 | PRJNA256991 | SRS670888 |
| 1A5 x 1E4 | B51.1 | PRJNA256991 | SRS670890 |
| 1A5 x 1E4 | B7.1  | PRJNA256991 | SRS670891 |
| 1A5 x 1E4 | B9.1  | PRJNA256991 | SRS670895 |
| 1A5 x 1E4 | B9.2  | PRJNA256991 | SRS670896 |
| 1A5 x 1E4 | C1.1  | PRJNA256991 | SRS670897 |
| 1A5 x 1E4 | C1.2  | PRJNA256991 | SRS670898 |
| 1A5 x 1E4 | C10.1 | PRJNA256991 | SRS670899 |
| 1A5 x 1E4 | C11.1 | PRJNA256991 | SRS670901 |
| 1A5 x 1E4 | C12.1 | PRJNA256991 | SRS670903 |
| 1A5 x 1E4 | C12.2 | PRJNA256991 | SRS670904 |
| 1A5 x 1E4 | C13.1 | PRJNA256991 | SRS670905 |
| 1A5 x 1E4 | C14.1 | PRJNA256991 | SRS670907 |
| 1A5 x 1E4 | C16.1 | PRJNA256991 | SRS670908 |
| 1A5 x 1E4 | C16.2 | PRJNA256991 | SRS670910 |
| 1A5 x 1E4 | C16.3 | PRJNA256991 | SRS670911 |
| 1A5 x 1E4 | C17.1 | PRJNA256991 | SRS670912 |
| 1A5 x 1E4 | C19.1 | PRJNA256991 | SRS670914 |

|           |       |             |           |
|-----------|-------|-------------|-----------|
| 1A5 x 1E4 | C2.1  | PRJNA256991 | SRS670917 |
| 1A5 x 1E4 | C2.2  | PRJNA256991 | SRS670919 |
| 1A5 x 1E4 | C20.1 | PRJNA256991 | SRS670918 |
| 1A5 x 1E4 | C20.2 | PRJNA256991 | SRS670920 |
| 1A5 x 1E4 | C21.1 | PRJNA256991 | SRS670921 |
| 1A5 x 1E4 | C21.2 | PRJNA256991 | SRS670922 |
| 1A5 x 1E4 | C22.1 | PRJNA256991 | SRS670923 |
| 1A5 x 1E4 | C22.2 | PRJNA256991 | SRS670924 |
| 1A5 x 1E4 | C23.1 | PRJNA256991 | SRS670925 |
| 1A5 x 1E4 | C23.2 | PRJNA256991 | SRS670926 |
| 1A5 x 1E4 | C24.1 | PRJNA256991 | SRS670927 |
| 1A5 x 1E4 | C24.2 | PRJNA256991 | SRS670929 |
| 1A5 x 1E4 | C25.1 | PRJNA256991 | SRS670928 |
| 1A5 x 1E4 | C26.1 | PRJNA256991 | SRS670931 |
| 1A5 x 1E4 | C27.1 | PRJNA256991 | SRS670933 |
| 1A5 x 1E4 | C27.2 | PRJNA256991 | SRS670934 |
| 1A5 x 1E4 | C28.1 | PRJNA256991 | SRS670935 |
| 1A5 x 1E4 | C28.2 | PRJNA256991 | SRS670936 |
| 1A5 x 1E4 | C29.2 | PRJNA256991 | SRS670938 |
| 1A5 x 1E4 | C3.1  | PRJNA256991 | SRS670939 |
| 1A5 x 1E4 | C3.2  | PRJNA256991 | SRS670940 |
| 1A5 x 1E4 | C30.1 | PRJNA256991 | SRS670941 |
| 1A5 x 1E4 | C30.2 | PRJNA256991 | SRS670942 |
| 1A5 x 1E4 | C31.1 | PRJNA256991 | SRS670943 |
| 1A5 x 1E4 | C32.1 | PRJNA256991 | SRS670946 |
| 1A5 x 1E4 | C32.2 | PRJNA256991 | SRS670947 |
| 1A5 x 1E4 | C33.1 | PRJNA256991 | SRS670948 |
| 1A5 x 1E4 | C33.2 | PRJNA256991 | SRS670949 |
| 1A5 x 1E4 | C34.1 | PRJNA256991 | SRS670950 |
| 1A5 x 1E4 | C34.2 | PRJNA256991 | SRS670951 |
| 1A5 x 1E4 | C35.1 | PRJNA256991 | SRS670952 |
| 1A5 x 1E4 | C36.1 | PRJNA256991 | SRS670954 |
| 1A5 x 1E4 | C38.1 | PRJNA256991 | SRS670956 |
| 1A5 x 1E4 | C38.2 | PRJNA256991 | SRS670957 |
| 1A5 x 1E4 | C4.1  | PRJNA256991 | SRS670958 |
| 1A5 x 1E4 | C4.2  | PRJNA256991 | SRS670959 |
| 1A5 x 1E4 | C41.1 | PRJNA256991 | SRS670960 |
| 1A5 x 1E4 | C41.2 | PRJNA256991 | SRS670961 |
| 1A5 x 1E4 | C42.1 | PRJNA256991 | SRS670962 |
| 1A5 x 1E4 | C42.2 | PRJNA256991 | SRS670963 |
| 1A5 x 1E4 | C44.1 | PRJNA256991 | SRS670964 |
| 1A5 x 1E4 | C44.2 | PRJNA256991 | SRS670965 |
| 1A5 x 1E4 | C45.1 | PRJNA256991 | SRS670966 |

|           |          |             |           |
|-----------|----------|-------------|-----------|
| 1A5 x 1E4 | C45.2    | PRJNA256991 | SRS670967 |
| 1A5 x 1E4 | C48.1    | PRJNA256991 | SRS670968 |
| 1A5 x 1E4 | C48.2    | PRJNA256991 | SRS670969 |
| 1A5 x 1E4 | C49.1    | PRJNA256991 | SRS670970 |
| 1A5 x 1E4 | C5.1     | PRJNA256991 | SRS670972 |
| 1A5 x 1E4 | C5.2     | PRJNA256991 | SRS670973 |
| 1A5 x 1E4 | C51.1    | PRJNA256991 | SRS670974 |
| 1A5 x 1E4 | C51.2    | PRJNA256991 | SRS670975 |
| 1A5 x 1E4 | C52.1    | PRJNA256991 | SRS670976 |
| 1A5 x 1E4 | C53.1    | PRJNA256991 | SRS670977 |
| 1A5 x 1E4 | C54.1    | PRJNA256991 | SRS670979 |
| 1A5 x 1E4 | C55.1    | PRJNA256991 | SRS670981 |
| 1A5 x 1E4 | C55.2    | PRJNA256991 | SRS670982 |
| 1A5 x 1E4 | C56.1    | PRJNA256991 | SRS670983 |
| 1A5 x 1E4 | C56.2    | PRJNA256991 | SRS670985 |
| 1A5 x 1E4 | C57.1    | PRJNA256991 | SRS670986 |
| 1A5 x 1E4 | C57.2    | PRJNA256991 | SRS670987 |
| 1A5 x 1E4 | C59.2    | PRJNA256991 | SRS670989 |
| 1A5 x 1E4 | C6.1     | PRJNA256991 | SRS670990 |
| 1A5 x 1E4 | C60.1    | PRJNA256991 | SRS670992 |
| 1A5 x 1E4 | C60.2    | PRJNA256991 | SRS670993 |
| 1A5 x 1E4 | C61.1    | PRJNA256991 | SRS670994 |
| 1A5 x 1E4 | C61.2    | PRJNA256991 | SRS670995 |
| 1A5 x 1E4 | C62.1    | PRJNA256991 | SRS670996 |
| 1A5 x 1E4 | C62.2    | PRJNA256991 | SRS670997 |
| 1A5 x 1E4 | C63.1    | PRJNA256991 | SRS670998 |
| 1A5 x 1E4 | C7.1     | PRJNA256991 | SRS671000 |
| 1A5 x 1E4 | C7.2     | PRJNA256991 | SRS671001 |
| 1A5 x 1E4 | C8.1     | PRJNA256991 | SRS671002 |
| 1A5 x 1E4 | CR4_A1.1 | PRJNA256991 | SRS671004 |
| 1A5 x 1E4 | CR4_A2.1 | PRJNA256991 | SRS671006 |
| 1A5 x 1E4 | CR4_A2.2 | PRJNA256991 | SRS671007 |
| 1A5 x 1E4 | CR4_A3.1 | PRJNA256991 | SRS671010 |
| 1A5 x 1E4 | CR4_A3.2 | PRJNA256991 | SRS671012 |
| 1A5 x 1E4 | CR4_A4.1 | PRJNA256991 | SRS671015 |
| 1A5 x 1E4 | D1.1     | PRJNA256991 | SRS671014 |
| 1A5 x 1E4 | D1.2     | PRJNA256991 | SRS671016 |
| 1A5 x 1E4 | D1.3     | PRJNA256991 | SRS671018 |
| 1A5 x 1E4 | D10.1    | PRJNA256991 | SRS671019 |
| 1A5 x 1E4 | D11.1    | PRJNA256991 | SRS671021 |
| 1A5 x 1E4 | D2.1     | PRJNA256991 | SRS671023 |
| 1A5 x 1E4 | D3.1     | PRJNA256991 | SRS671026 |
| 1A5 x 1E4 | D3.2     | PRJNA256991 | SRS671025 |
| 1A5 x 1E4 | D4.1     | PRJNA256991 | SRS671027 |

|           |      |             |           |
|-----------|------|-------------|-----------|
| 1A5 x 1E4 | D5.1 | PRJNA256991 | SRS671029 |
| 1A5 x 1E4 | D7.1 | PRJNA256991 | SRS671031 |
| 1A5 x 1E4 | D7.2 | PRJNA256991 | SRS671032 |
| 1A5 x 1E4 | D7.3 | PRJNA256991 | SRS671033 |
| 1A5 x 1E4 | D9.1 | PRJNA256991 | SRS671035 |
| 1A5 x 1E4 | D9.2 | PRJNA256991 | SRS671038 |

---

**Table S2 Camera and light setup overview.**

| Parameter             | Specification                                                                               |
|-----------------------|---------------------------------------------------------------------------------------------|
| Camera height         | 45 cm                                                                                       |
| Lights                | Two boxes with each two light bulbs (set up as a X). Boxes are setup to the left and right! |
| Bulbs                 | PHILIPHS TL 20W/55 DE LUXE                                                                  |
| Background            | Blue paper (single layered)                                                                 |
| Calibration reference | Millimeter grid paper                                                                       |
| Focus reference       | Petri dish lid with a labeling 'Focus Reference'                                            |

**Table S3 Detailed information on the camera and lens used during image taking, as well as detailed information regarding the camera settings.**

| Camera type / Parameter <sup>a</sup> | Specification / Settings             |
|--------------------------------------|--------------------------------------|
| Body                                 | CANON EOS 60D Body                   |
| Lens                                 | CANON EF 50mm F/2.5 Compact Macro    |
| ISO-Sensitivity                      | 200                                  |
| Aperture (Depth of field)            | 14                                   |
| Shutter speed 1)                     | 5                                    |
| Focus point 2)                       | Set to the most right square         |
| Light exposure measurement           | full                                 |
| Quality                              | RAW (5184x3456) and JPEG (5184x3456) |
| Peripheral illumin. Correct.         | Enable                               |
| Red-eye reduc.                       | Disable                              |
| Flash control (Flash firing)         | Disable                              |
| Expo.comp./AEB                       | Set to Zero (in the center)          |
| Auto Lighting Optimizer              | Standard                             |
| Picture Style                        | Standard                             |
| White Balance                        | AWB (=automatic)                     |
| WB Shift/BKT                         | 0,0/±0                               |
| Color space                          | sRGB                                 |
| ISO Auto                             | Max: 3200                            |
| Live View shoot.                     | Enable                               |
| AF mode                              | Live mode                            |
| Grid display                         | OFF                                  |
| Aspect ratio                         | 3:2                                  |
| Expo.simulation                      | Enable                               |
| Silent shooting                      | Mode 1                               |
| Metering timer                       | 4 sec.                               |
| File numbering                       | Continuous                           |

<sup>a</sup> 1) The shutter speed was set to 5, because under the specific light settings this value provided optimal illumination conditions. 2) The focus point was not set onto the fungal colonies, but to a Petri dish lid, just beside the plate containing the colonies. This additional lid was labeled with 'Focus Reference'. This labeling was at the same height as the fungal colonies, thus resulting for all colonies in sharp images, even if the height of the medium varied a bit.



**Table S4 Melanization phenotypes (grey values) for the quality filter retained progeny used in the QTL analysis for each of the two crosses.**

| Cross     | Retained progeny for QTL analysis | Environment / Colony age (dpi) |             |             |             |              |              |               |                |                |
|-----------|-----------------------------------|--------------------------------|-------------|-------------|-------------|--------------|--------------|---------------|----------------|----------------|
|           |                                   | Cold / 8                       | Cold / 11   | Cold / 14   | Control / 8 | Control / 11 | Control / 14 | Fungicide / 8 | Fungicide / 11 | Fungicide / 14 |
| 3D1 x 3D7 | 1.1                               | NA                             | 93.04607873 | 63.78769444 | NA          | 71.23581861  | 67.52683429  | NA            | 67.02107424    | 69.7407959     |
| 3D1 x 3D7 | 1.2                               | 138.9211667                    | 122.9319667 | 97.11144524 | 96.55215    | 58.83029167  | 51.17904167  | 90.96024888   | 65.84066857    | 52.35253429    |
| 3D1 x 3D7 | 10.1                              | NA                             | 64.8691709  | 49.19910134 | NA          | 57.37409722  | 52.89087429  | NA            | 58.08289303    | 61.88949621    |
| 3D1 x 3D7 | 100.1                             | 126.0365062                    | 96.51860995 | 84.74405776 | 84.4686653  | 54.38001237  | 41.18947667  | 97.21626125   | 61.62162222    | 43.78903833    |
| 3D1 x 3D7 | 100.2                             | NA                             | NA          | NA          | 130.362     | 111.038      | 89.081       | 122.192       | 103.41         | 80.703         |
| 3D1 x 3D7 | 101.2                             | 105.2208167                    | 110.885     | 82.07116667 | 115.7047548 | 87.58248333  | 70.77283333  | 113.8538611   | 92.12066667    | 77.19388889    |
| 3D1 x 3D7 | 102.1                             | 105.6240078                    | 58.91512232 | 62.00044471 | 70.04411476 | 54.14168105  | 44.92877808  | 75.14588822   | 52.81095889    | 45.30180626    |
| 3D1 x 3D7 | 102.2                             | 130.57                         | 107.3673333 | 89.673      | 125.4268    | 123.7577667  | 98.14745     | 128.3555556   | 110.1217778    | 84.55083333    |
| 3D1 x 3D7 | 103.1                             | 123.2223212                    | 86.10474875 | 58.1981572  | 79.39884322 | 50.95954548  | 39.97316381  | 85.77439636   | 53.72039736    | 41.51781945    |
| 3D1 x 3D7 | 104.1                             | 129.5802667                    | 106.52175   | 100.1136917 | 84.41975333 | 68.6814      | 53.95695     | 79.29458333   | 70.58371667    | 56.54508334    |
| 3D1 x 3D7 | 104.2                             | 128.1313236                    | 97.07834538 | 77.17254615 | 120.69925   | 113.3807896  | 94.37626944  | 124.7285833   | 104.5802222    | 80.3585        |
| 3D1 x 3D7 | 105.1                             | 136.8757474                    | 120.7077669 | 105.5548362 | 125.8309911 | 70.91158182  | 59.40977424  | 114.7506416   | 68.71309821    | 58.40494       |
| 3D1 x 3D7 | 105.2                             | 143.5365783                    | 141.1571521 | 119.8104176 | 131.9361982 | 106.5099222  | 81.25990333  | 137.0743612   | 102.7411322    | 83.67342       |
| 3D1 x 3D7 | 106.1                             | 139.6565128                    | 114.8448463 | 77.57321724 | 128.167917  | 63.6189048   | 56.07898959  | 99.45640081   | 74.7566568     | 61.05086472    |
| 3D1 x 3D7 | 106.2                             | 115.9161838                    | 79.5166859  | 62.98536364 | 72.47211933 | 60.85494351  | 53.55747143  | 95.35758965   | 67.89552051    | 58.22254167    |
| 3D1 x 3D7 | 107.1                             | 139.9931532                    | 134.0789152 | 104.7542548 | 99.64869838 | 69.55389269  | 59.78968333  | 100.5925153   | 71.2904198     | 56.71587476    |
| 3D1 x 3D7 | 108.1                             | 126.0041042                    | 100.9846077 | 88.60353125 | 84.49662993 | 62.95990197  | 50.02795222  | 87.86632974   | 61.15597824    | 47.16040321    |
| 3D1 x 3D7 | 108.2                             | 129.5529                       | 82.22087905 | 56.18452    | 117.9318333 | 117.24645    | 97.407375    | 119.83958     | 110.3138833    | 85.44816667    |
| 3D1 x 3D7 | 109.1                             | 135.3257329                    | 120.0563643 | 97.52829116 | 82.16497106 | 65.55824286  | 61.74073047  | 82.79800085   | 67.83865263    | 58.78931581    |
| 3D1 x 3D7 | 109.2                             | 137.3307708                    | 123.0388448 | 93.01046042 | 96.44440355 | 67.56110829  | 52.35975952  | 100.2994008   | 72.21352232    | 56.7993125     |

|           |       |             |             |             |             |             |             |             |             |             |
|-----------|-------|-------------|-------------|-------------|-------------|-------------|-------------|-------------|-------------|-------------|
| 3D1 x 3D7 | 11.1  | 137.6486214 | 131.1213452 | 108.9592876 | 132.0365407 | 90.66232009 | 66.06892381 | 133.1571107 | 109.75148   | 78.56545167 |
| 3D1 x 3D7 | 11.2  | NA          | 121.8148423 | 111.8334222 | NA          | 120.8221206 | 117.90772   | NA          | 126.1377512 | 117.5103294 |
| 3D1 x 3D7 | 110.1 | 126.5874751 | 95.12559761 | 78.28639186 | 100.1105441 | 65.51498795 | 47.47087143 | 115.2536224 | 67.42445379 | 43.80073636 |
| 3D1 x 3D7 | 110.2 | NA          | NA          | NA          | 125.4243611 | 106.8474572 | 85.39096667 | 122.3512603 | 110.7835679 | 90.86082619 |
| 3D1 x 3D7 | 111.2 | 137.30737   | 136.2373752 | 97.88299143 | 117.6417819 | 80.28050952 | 76.18885953 | 118.6178548 | 90.40874    | 77.8929     |
| 3D1 x 3D7 | 112.1 | 135.478825  | 115.7907415 | 97.84553665 | 105.8666501 | 68.53853043 | 48.48154286 | 118.8581524 | 74.87240171 | 53.75149107 |
| 3D1 x 3D7 | 113.1 | 125.3779453 | 95.21866615 | 76.047      | 85.39857165 | 62.78296942 | 53.28581778 | 97.93049    | 66.821415   | 54.44839    |
| 3D1 x 3D7 | 113.2 | 128.519147  | 133.066299  | 124.0499274 | 142.3264405 | 139.8238529 | 119.5206    | 148.5043167 | 147.0384889 | 125.2621607 |
| 3D1 x 3D7 | 114.1 | 138.3819095 | 124.2893086 | 105.4281481 | 96.22480025 | 66.47385357 | 54.10065476 | 99.12644524 | 68.84467762 | 54.68510667 |
| 3D1 x 3D7 | 114.2 | 133.3009271 | 121.1906575 | 80.90807242 | 125.2174758 | 78.20477222 | 55.09530286 | 116.1495555 | 75.72660556 | 60.96945833 |
| 3D1 x 3D7 | 115.1 | 136.0427333 | 98.37231537 | 71.32154925 | 89.0400375  | 63.88561667 | 48.7861197  | 108.78675   | 76.25120833 | 53.87179167 |
| 3D1 x 3D7 | 116.1 | 135.0430083 | 115.5107914 | 84.17046389 | 118.9417083 | 91.14092897 | 71.23753333 | 128.22167   | 96.84129    | 66.53856333 |
| 3D1 x 3D7 | 116.2 | 140.8755833 | 139.82436   | 78.72343333 | 93.04799778 | 73.22596111 | 58.11796667 | 98.49983333 | 72.07444444 | 58.56844444 |
| 3D1 x 3D7 | 117.1 | 132.4399439 | 122.5927791 | 106.0175239 | 119.3944039 | 81.66589767 | 67.64874889 | 112.8362233 | 76.85737111 | 57.38383143 |
| 3D1 x 3D7 | 117.2 | 128.52064   | 105.45836   | 79.7792     | 75.26450762 | 68.66133143 | 56.7680875  | 94.56266667 | 75.62916667 | 58.88944444 |
| 3D1 x 3D7 | 118.1 | 133.3702659 | 112.158625  | 83.27358667 | 119.619208  | 91.38438881 | 64.85122679 | 122.2293167 | 96.69215    | 64.49689143 |
| 3D1 x 3D7 | 118.2 | 126.11014   | 84.838625   | 55.55818333 | 138.3078333 | 123.9671667 | 117.181125  | 142.0044792 | 127.4886042 | 108.3779167 |
| 3D1 x 3D7 | 119.1 | 145.1185318 | 135.580901  | 117.24819   | 134.9084222 | 119.741765  | 101.1712333 | 139.3677143 | 123.6001867 | 110.5751833 |
| 3D1 x 3D7 | 119.2 | 139.7671636 | 133.0280805 | 99.67200237 | 127.5515459 | 99.94991549 | 75.25956643 | 126.7247514 | 89.38076064 | 73.23461905 |
| 3D1 x 3D7 | 12.1  | 139.7715    | 110.0047283 | 94.17649128 | 102.651645  | 66.20026864 | 56.78980476 | 108.3259117 | 72.55310973 | 61.16291869 |
| 3D1 x 3D7 | 120.1 | 134.7883886 | 105.9334518 | 79.61856238 | 133.1658166 | 95.6161536  | 67.51032576 | 135.1733952 | 93.09351571 | 65.90646667 |
| 3D1 x 3D7 | 120.2 | 124.2219805 | 110.072525  | 100.2247767 | 95.65480329 | 85.03769111 | 86.65640714 | 90.14887841 | 83.99976778 | 81.37065333 |
| 3D1 x 3D7 | 121.2 | 123.9392351 | 98.98418546 | 79.66360635 | 92.39195763 | 65.91036984 | 54.76798907 | 89.79158722 | 70.27571382 | 58.98644444 |
| 3D1 x 3D7 | 122.1 | 126.5892667 | 109.40377   | 80.8714     | 101.6230529 | 57.814995   | 48.83373333 | 98.04725    | 59.8783     | 46.02056667 |
| 3D1 x 3D7 | 123.1 | NA          | 69.50102659 | 49.82799148 | NA          | 58.8571529  | 46.36049889 | NA          | 68.11835801 | 54.66151539 |

|           |       |             |             |             |             |             |             |             |             |             |
|-----------|-------|-------------|-------------|-------------|-------------|-------------|-------------|-------------|-------------|-------------|
| 3D1 x 3D7 | 125.1 | 126.4556433 | 100.3504289 | 77.63635833 | 85.64143535 | 59.08528523 | 53.43250051 | 90.51655429 | 69.37335    | 61.18938809 |
| 3D1 x 3D7 | 126.1 | 139.5133892 | 118.4039468 | 94.91439377 | 76.11003998 | 66.28649052 | 64.25514187 | 75.358708   | 65.68804542 | 67.48054593 |
| 3D1 x 3D7 | 127.1 | 131.725375  | 117.4720167 | 104.2255    | 101.6777198 | 81.4786     | 68.09599333 | 124.9721167 | 90.83951667 | 75.69251667 |
| 3D1 x 3D7 | 127.2 | 143.4491733 | 122.447816  | 81.54710834 | 131.3147957 | 111.5763038 | 92.14050667 | 123.9024349 | 91.32499    | 63.9832     |
| 3D1 x 3D7 | 128.1 | NA          | 105.0129791 | 76.99662611 | NA          | 82.70266069 | 74.0846381  | NA          | 113.1437882 | 99.79397253 |
| 3D1 x 3D7 | 128.2 | 127.0527224 | 78.39297549 | 59.571295   | 78.78503135 | 58.73308359 | 52.63618222 | 90.26637411 | 61.753475   | 50.01614445 |
| 3D1 x 3D7 | 129.2 | 140.1191589 | 114.5787879 | 93.51255278 | 134.9651768 | 119.3261459 | 93.968775   | 126.6757781 | 106.5582031 | 82.00331905 |
| 3D1 x 3D7 | 13.1  | 134.0823333 | 121.9055201 | 104.598197  | 116.7126463 | 79.55738214 | 61.99740833 | 117.3200201 | 87.98913532 | 73.77595577 |
| 3D1 x 3D7 | 130.1 | 136.1447291 | 122.906545  | 103.4695933 | 78.05342548 | 54.76757206 | 49.95019    | 97.02448333 | 63.06407    | 50.06703333 |
| 3D1 x 3D7 | 131.1 | 141.5348463 | 124.7765354 | 84.07406762 | 109.4931242 | 105.9982066 | 91.02191667 | 125.7177935 | 121.0286218 | 99.46412    |
| 3D1 x 3D7 | 133.1 | 131.9478242 | 106.4417907 | 67.59122038 | 97.33066485 | 73.30647811 | 58.20252214 | 113.4148019 | 95.20031684 | 69.50066061 |
| 3D1 x 3D7 | 134.1 | 143.5851279 | 134.3886446 | 102.1055175 | 124.3813    | 111.7503562 | 92.38336143 | 136.938979  | 126.3972179 | 110.295     |
| 3D1 x 3D7 | 135.2 | 130.4660128 | 114.7943829 | 97.77874911 | 127.2511994 | 99.90496112 | 77.859375   | 123.9033679 | 93.88124672 | 72.15154167 |
| 3D1 x 3D7 | 136.1 | 140.7493921 | 129.8525634 | 82.80071678 | 127.8523795 | 94.4159059  | 70.69312222 | 134.8109516 | 108.0835791 | 81.27556254 |
| 3D1 x 3D7 | 137.1 | 119.4746667 | 110.7685583 | 85.52414583 | 102.61695   | 73.00778333 | 49.91662    | 91.11275333 | 66.73592667 | 56.01036667 |
| 3D1 x 3D7 | 137.2 | 129.5483633 | 112.82077   | 92.908915   | 128.7930011 | 121.4635848 | 109.73014   | 131.7700625 | 119.1038375 | 107.63625   |
| 3D1 x 3D7 | 138.1 | 127.0638667 | 83.92144286 | 53.52492238 | 84.11145338 | 58.71760143 | 49.02142889 | 85.82568    | 63.03203    | 48.49969    |
| 3D1 x 3D7 | 139.2 | 125.9147446 | 108.3824429 | 107.074289  | 87.53323333 | 58.30098714 | 49.5000881  | 112.3985143 | 78.85935714 | 59.55893571 |
| 3D1 x 3D7 | 14.1  | NA          | 83.32912603 | 53.33956    | NA          | 49.97735758 | 41.21580381 | NA          | 64.96018294 | 50.04632222 |
| 3D1 x 3D7 | 141.1 | 115.4414806 | 73.28415486 | 59.03199092 | 89.82217616 | 79.61292417 | 60.25002833 | 109.025493  | 86.46800278 | 70.04466888 |
| 3D1 x 3D7 | 142.1 | 125.3967    | 93.19292    | 61.25091    | 80.61012    | 64.16727    | 58.29271    | 83.57514333 | 82.07171    | 63.61969667 |
| 3D1 x 3D7 | 142.2 | 142.21608   | 123.4780691 | 103.7644203 | 98.01887413 | 62.77557698 | 50.43148333 | 92.194025   | 63.94450625 | 50.59447917 |
| 3D1 x 3D7 | 143.1 | 130.7703195 | 103.581716  | 73.65817778 | 119.7673708 | 92.76618333 | 69.39238032 | 137.1490394 | 114.8420785 | 83.41273809 |
| 3D1 x 3D7 | 144.1 | 138.1035984 | 133.8091562 | 70.73748056 | 106.6117286 | 80.84769157 | 65.92154254 | 82.92068762 | 65.62776071 | 59.47129333 |
| 3D1 x 3D7 | 145.1 | 135.3504    | 133.8312    | 86.7972     | 113.604875  | 69.32104167 | 51.56841667 | 95.634      | 69.729625   | 49.977875   |

|           |       |             |             |             |             |             |             |             |             |             |
|-----------|-------|-------------|-------------|-------------|-------------|-------------|-------------|-------------|-------------|-------------|
| 3D1 x 3D7 | 145.2 | 129.2534468 | 73.03755654 | 56.01757783 | 79.4303338  | 59.82851984 | 54.35139405 | 88.94466165 | 62.80936379 | 53.76453056 |
| 3D1 x 3D7 | 146.1 | 118.8807422 | 81.40470303 | 62.60609658 | 74.08911486 | 58.54237652 | 47.38810556 | 92.77377802 | 69.4047919  | 60.45700377 |
| 3D1 x 3D7 | 146.2 | 132.6046987 | 111.6485549 | 74.14845667 | 122.1992651 | 101.986996  | 81.48734048 | 135.4102204 | 106.7135515 | 78.93662286 |
| 3D1 x 3D7 | 147.1 | 136.4732993 | 128.67055   | 108.254875  | 134.6993644 | 120.7140088 | 99.95066    | 139.6552089 | 124.4744369 | 106.8345488 |
| 3D1 x 3D7 | 148.1 | 136.286     | 114.7665762 | 82.628      | 125.8477333 | 117.1805    | 98.0468     | 137.6229    | 117.5911333 | 103.2995333 |
| 3D1 x 3D7 | 149.1 | 131.1865095 | 128.3453467 | 116.5734    | 112.1270984 | 73.51390333 | 49.46273333 | 94.54061667 | 63.88535    | 51.77802    |
| 3D1 x 3D7 | 149.2 | 120.8365625 | 95.95891667 | 75.98576667 | 98.12266667 | 69.509      | 54.48325    | 120.652875  | 104.4980625 | 83.12341667 |
| 3D1 x 3D7 | 15.1  | NA          | 111.2883258 | 83.38954571 | NA          | 79.41166167 | 60.071305   | NA          | 72.57174698 | 56.74346091 |
| 3D1 x 3D7 | 15.2  | NA          | 85.192125   | 53.33523667 | NA          | 67.56582    | 44.65534583 | NA          | 61.62569524 | 53.80952    |
| 3D1 x 3D7 | 150.1 | 125.2006901 | 96.7623936  | 62.65496821 | 114.4581669 | 91.90862167 | 70.32053929 | 126.4477333 | 102.5120111 | 80.92061    |
| 3D1 x 3D7 | 150.2 | 127.8079833 | 94.45016667 | 71.11658333 | 117.9136214 | 75.18476429 | 59.65614048 | 107.148     | 78.792      | 70.349      |
| 3D1 x 3D7 | 151.1 | 122.6230759 | 98.57915474 | 78.37785353 | 130.1197491 | 97.49294555 | 69.00558333 | 128.9237327 | 104.1192422 | 80.02399091 |
| 3D1 x 3D7 | 152.1 | 141.7708667 | 128.1424171 | 94.66597238 | 124.0634471 | 104.0821583 | 79.34974306 | 121.41195   | 96.74219    | 78.05893333 |
| 3D1 x 3D7 | 152.2 | 139.6088605 | 127.4561053 | 86.96286372 | 93.76765471 | 70.264686   | 60.49020409 | 90.42330261 | 75.80675778 | 64.27734476 |
| 3D1 x 3D7 | 154.1 | 138.0291878 | 120.4358417 | 100.9598698 | 115.1169251 | 86.2850923  | 66.31999048 | 124.7431726 | 94.19792538 | 68.14131399 |
| 3D1 x 3D7 | 154.2 | 133.12278   | 132.6397492 | 119.433145  | 116.4124    | 101.28245   | 72.76950333 | 113.42433   | 87.48600333 | 58.78476667 |
| 3D1 x 3D7 | 155.1 | 128.35642   | 91.59913333 | 62.19364444 | 91.89161623 | 74.82485119 | 54.38807778 | 104.7476958 | 75.24792262 | 58.17046072 |
| 3D1 x 3D7 | 156.1 | 120.3050869 | 73.37593952 | 63.11625915 | 90.66820417 | 71.42360812 | 56.7617875  | 88.0975903  | 70.99817429 | 56.71396571 |
| 3D1 x 3D7 | 157.1 | 145.3160951 | 108.641799  | 94.49760608 | 111.9562691 | 73.80657301 | 50.79755    | 106.2519157 | 75.28544077 | 55.66672061 |
| 3D1 x 3D7 | 158.1 | 144.9867352 | 99.01515128 | 63.72135032 | 85.61962574 | 60.51236923 | 52.34413    | 89.64194496 | 63.89058974 | 52.76340741 |
| 3D1 x 3D7 | 158.2 | 140.6205324 | 134.9761876 | 118.6019507 | 107.4968587 | 72.74571847 | 57.73827746 | 112.6076579 | 73.71987929 | 59.36658241 |
| 3D1 x 3D7 | 159.1 | 129.3485369 | 93.50156855 | 85.11393056 | 82.90811275 | 66.96638244 | 58.19407802 | 85.6230771  | 63.60724387 | 52.54960675 |
| 3D1 x 3D7 | 16.1  | 136.2823619 | 106.9365986 | 70.32432833 | 105.1598383 | 92.32704722 | 86.28127083 | 129.1850959 | 106.6898065 | 85.71427762 |
| 3D1 x 3D7 | 160.1 | 124.8917081 | 91.80438838 | 87.26488643 | 131.9349647 | 114.8857203 | 89.0324873  | 130.1053634 | 110.7333865 | 87.97914643 |
| 3D1 x 3D7 | 160.2 | 132.7578886 | 107.5048927 | 82.40952286 | 97.73144359 | 76.27823433 | 61.50911905 | 124.2041796 | 102.113184  | 76.92891429 |

|           |       |             |             |             |             |             |             |             |             |             |
|-----------|-------|-------------|-------------|-------------|-------------|-------------|-------------|-------------|-------------|-------------|
| 3D1 x 3D7 | 161.1 | 114.9409848 | 82.71843261 | 79.32695781 | 83.57319937 | 67.72782061 | 58.15893    | 99.9556764  | 75.35892381 | 60.68038889 |
| 3D1 x 3D7 | 161.2 | 126.16632   | 88.48092736 | 60.78921611 | 115.965403  | 100.6948312 | 86.29       | 113.9808894 | 97.87364215 | 81.15535357 |
| 3D1 x 3D7 | 162.1 | 112.5389223 | 61.18032419 | 66.87168131 | 85.64414134 | 66.32368606 | 54.04496299 | 101.0176697 | 81.77553891 | 58.71008232 |
| 3D1 x 3D7 | 162.2 | 142.0265508 | 101.1079996 | 83.996875   | 120.0816425 | 87.86108921 | 76.23789286 | 115.9747656 | 78.46690183 | 66.89146578 |
| 3D1 x 3D7 | 163.1 | 116.2694698 | 79.69892045 | 62.5408549  | 89.94441995 | 62.28876657 | 46.71306806 | 85.43330952 | 69.03779977 | 52.04257833 |
| 3D1 x 3D7 | 164.1 | 141.3336511 | 139.7041262 | 133.1069132 | 138.5022579 | 122.944054  | 86.19689039 | 134.1091958 | 128.660429  | 96.45068538 |
| 3D1 x 3D7 | 164.2 | 130.4233825 | 77.79271731 | 63.12385139 | 85.29031857 | 66.18034675 | 56.76234921 | 111.9178215 | 74.39504266 | 59.81449167 |
| 3D1 x 3D7 | 165.1 | 141.7799278 | 120.2202652 | 85.1389498  | 130.8062332 | 86.82499984 | 64.84592292 | 119.3387083 | 85.5438497  | 68.66865833 |
| 3D1 x 3D7 | 165.2 | 140.5679498 | 126.6398297 | 94.29226089 | 103.5160775 | 77.99954265 | 65.83169047 | 95.78463277 | 74.20973939 | 58.44691587 |
| 3D1 x 3D7 | 166.1 | 140.6971626 | 122.0042207 | 114.9363918 | 88.64881645 | 64.79402064 | 56.74132484 | 106.7851129 | 84.66343045 | 63.83962937 |
| 3D1 x 3D7 | 167.1 | 139.3141667 | 135.0375986 | 124.2252    | 136.7217143 | 142.5445778 | 139.22575   | 146.5065333 | 147.9730857 | 135.04325   |
| 3D1 x 3D7 | 167.2 | 140.1945519 | 135.0509203 | 100.6235077 | 103.7432064 | 61.63875268 | 56.9507875  | 104.0934101 | 61.93783445 | 52.77663632 |
| 3D1 x 3D7 | 168.1 | 137.4919675 | 131.4617516 | 122.27475   | 126.7435308 | 112.2218591 | 72.28571191 | 109.4642303 | 100.3596607 | 70.47102143 |
| 3D1 x 3D7 | 169.1 | 121.9518131 | 91.7737569  | 69.72953667 | 106.9001767 | 91.21401799 | 80.64860278 | 135.9567168 | 109.0450082 | 86.70945873 |
| 3D1 x 3D7 | 169.2 | 133.4081591 | 104.632679  | 89.26455794 | 92.91455357 | 86.19270667 | 72.29893333 | 95.70178745 | 86.33760273 | 62.88875682 |
| 3D1 x 3D7 | 17.2  | NA          | 78.02109722 | 54.53772727 | NA          | 85.84417613 | 72.71295175 | NA          | 96.9145714  | 81.59784473 |
| 3D1 x 3D7 | 170.1 | 133.4990222 | 112.38848   | 94.14356667 | 104.4950397 | 75.96337042 | 57.4673     | 91.141675   | 62.02766806 | 51.631275   |
| 3D1 x 3D7 | 170.2 | 130.4647887 | 122.1167192 | 99.50609158 | 96.46677897 | 73.62106374 | 53.98268816 | 81.29295325 | 64.64216982 | 51.46869637 |
| 3D1 x 3D7 | 171.1 | 136.9493321 | 101.8828103 | 77.79513857 | 113.2749764 | 80.69472718 | 63.04177083 | 113.3054646 | 83.92688542 | 67.251925   |
| 3D1 x 3D7 | 172.1 | 131.3999605 | 97.87915555 | 73.07184722 | 94.15807478 | 79.93741238 | 61.98920635 | 103.2158988 | 87.81111458 | 68.5316625  |
| 3D1 x 3D7 | 173.1 | 128.2914354 | 101.0742199 | 69.81236667 | 120.2945938 | 92.97012777 | 69.64448611 | 132.6136389 | 93.72208333 | 73.5067619  |
| 3D1 x 3D7 | 174.1 | NA          | 133.973075  | 103.3649967 | 81.41447786 | 57.23125476 | 49.63572308 | 92.17682792 | 63.07896575 | 50.92446667 |
| 3D1 x 3D7 | 174.2 | 134.6040208 | 121.4943916 | 99.81489299 | 129.7922309 | 114.1100626 | 101.15172   | 137.0385239 | 112.3471531 | 98.18325556 |
| 3D1 x 3D7 | 175.1 | 136.9860548 | 127.7213121 | 98.38204366 | 98.94851281 | 71.53172436 | 56.63314048 | 101.5353816 | 76.76785069 | 61.03854524 |
| 3D1 x 3D7 | 176.2 | 135.6852333 | 134.4379333 | 94.76       | 88.8825381  | 64.45169047 | 56.53269667 | 89.58376111 | 61.75283492 | 54.26904762 |

|           |       |             |             |             |             |             |             |             |             |             |
|-----------|-------|-------------|-------------|-------------|-------------|-------------|-------------|-------------|-------------|-------------|
| 3D1 x 3D7 | 177.2 | 133.1597735 | 103.0041777 | 71.98844051 | 85.96196895 | 80.39028286 | 78.73309167 | 94.20947329 | 91.685755   | 76.73945833 |
| 3D1 x 3D7 | 178.1 | NA          | NA          | NA          | NA          | NA          | NA          | 126.9862143 | 92.74939286 | 82.50085715 |
| 3D1 x 3D7 | 179.1 | 136.8075833 | 128.5307389 | 91.42731667 | 122.78785   | 88.36983306 | 77.86247222 | 128.5165    | 100.612375  | 84.09683333 |
| 3D1 x 3D7 | 179.2 | 132.0871729 | 102.2969964 | 84.54231337 | 89.65980145 | 64.50878737 | 55.3489295  | 93.37581436 | 66.74216143 | 59.45812667 |
| 3D1 x 3D7 | 18.1  | NA          | 74.11730128 | 63.12752571 | NA          | 70.05034295 | 73.37750333 | NA          | 71.63110883 | 61.39760389 |
| 3D1 x 3D7 | 18.2  | NA          | 79.52240393 | 51.92528031 | NA          | 64.17108769 | 47.83613551 | NA          | 96.81743163 | 78.69287397 |
| 3D1 x 3D7 | 180.1 | 130.928     | 125.6056111 | 110.2960417 | 102.5074846 | 61.14320089 | 48.77499762 | 101.8163208 | 67.18779167 | 59.23447917 |
| 3D1 x 3D7 | 180.2 | 123.4830833 | 91.92473651 | 82.19987143 | 93.62233333 | 69.86728571 | 53.272      | 122.2260441 | 96.3794127  | 70.87319444 |
| 3D1 x 3D7 | 181.1 | 138.5844167 | 118.37634   | 94.73722921 | 127.1647764 | 117.1652574 | 104.1304444 | 129.1146393 | 121.4279271 | 110.6032292 |
| 3D1 x 3D7 | 181.2 | 133.9570464 | 100.5583562 | 73.34261857 | 92.76504167 | 89.20709333 | 76.90155    | 90.9479006  | 77.88104091 | 61.97859281 |
| 3D1 x 3D7 | 182.1 | 138.8383854 | 132.047874  | 101.2305104 | 106.9959371 | 64.53352258 | 57.63130667 | 90.86887583 | 64.45460702 | 57.52971167 |
| 3D1 x 3D7 | 183.1 | NA          | NA          | NA          | NA          | NA          | NA          | NA          | NA          | NA          |
| 3D1 x 3D7 | 184.1 | NA          | NA          | NA          | NA          | NA          | NA          | NA          | NA          | NA          |
| 3D1 x 3D7 | 185.1 | NA          | NA          | NA          | NA          | NA          | NA          | NA          | NA          | NA          |
| 3D1 x 3D7 | 19.1  | 138.7258714 | 107.6435993 | 82.88130148 | 103.3610352 | 78.20949838 | 61.11105111 | 117.9348998 | 94.24286286 | 73.7936619  |
| 3D1 x 3D7 | 19.2  | NA          | 107.6364694 | 72.39309874 | NA          | 85.75249216 | 56.85602167 | NA          | 76.3162016  | 62.8778537  |
| 3D1 x 3D7 | 2.1   | 120.7387152 | 73.80284558 | 53.2984424  | 71.45976675 | 59.86445624 | 53.14225512 | 100.9353505 | 73.39745619 | 59.47159333 |
| 3D1 x 3D7 | 20.1  | 147.066     | 115.4841667 | 69.31626667 | 95.77294643 | 70.54279464 | 61.3963125  | 122.2411944 | 97.62733334 | 83.31825    |
| 3D1 x 3D7 | 20.2  | 123.4709953 | 97.40425237 | 63.45829606 | NA          | NA          | NA          | 113.3631644 | 90.21282463 | 67.59146515 |
| 3D1 x 3D7 | 21.1  | 119.0331243 | 79.74781381 | 50.06561714 | 101.3145369 | 70.13502747 | 51.53922047 | 107.9206684 | 72.78840476 | 53.30451872 |
| 3D1 x 3D7 | 21.2  | 138.2668083 | 133.4046289 | 90.352745   | 100.6563    | 63.72740222 | 53.8289927  | 103.1368583 | 69.40558399 | 60.48088413 |
| 3D1 x 3D7 | 22.1  | 127.368559  | 72.98749167 | 51.847525   | 93.68857333 | 59.97400333 | 49.10106667 | 102.3140991 | 69.31290667 | 50.18473333 |
| 3D1 x 3D7 | 22.2  | 132.1485744 | 122.2830277 | 96.73257455 | 90.00063577 | 88.60251508 | 77.730375   | 114.7322311 | 93.48751581 | 81.75186905 |
| 3D1 x 3D7 | 23.1  | 140.7580371 | 112.4338281 | 87.59477607 | 96.36800265 | 63.78457273 | 56.1898875  | 110.0397162 | 71.49468462 | 56.49143778 |
| 3D1 x 3D7 | 23.2  | 111.2859571 | 72.89072999 | 69.66789171 | 72.92616186 | 60.61715912 | 51.36600897 | 80.51897992 | 64.78053619 | 57.30784974 |

|           |      |             |             |             |             |             |             |             |             |             |
|-----------|------|-------------|-------------|-------------|-------------|-------------|-------------|-------------|-------------|-------------|
| 3D1 x 3D7 | 24.1 | 125.5408957 | 91.2279461  | 73.49852576 | 97.42646881 | 85.0940594  | 82.83992333 | 135.9855603 | 98.26310206 | 92.04419333 |
| 3D1 x 3D7 | 24.2 | 122.6635302 | 74.30309643 | 57.48431317 | 92.277975   | 59.74193222 | 50.36335667 | 95.16678889 | 66.39898667 | 53.14889667 |
| 3D1 x 3D7 | 25.1 | 123.7440512 | 76.32463467 | 61.97325604 | 81.67686039 | 64.00770968 | 65.80936667 | 91.84036791 | 72.28121398 | 66.28256528 |
| 3D1 x 3D7 | 26.1 | 140.2089124 | 134.5376982 | 113.3056728 | 113.6351578 | 76.04276089 | 61.45908294 | 112.2144822 | 76.8064081  | 68.85675286 |
| 3D1 x 3D7 | 26.2 | 122.0893114 | 90.12150899 | 66.15026381 | 74.09280354 | 54.49137167 | 43.91788333 | 85.62801631 | 67.28101238 | 52.85703506 |
| 3D1 x 3D7 | 27.1 | 137.9265    | 97.268225   | 68.1778125  | 121.5021    | 100.93985   | 85.25397917 | 131.6998    | 96.7159     | 82.45925    |
| 3D1 x 3D7 | 28.1 | 140.1991462 | 135.1912308 | 119.8964695 | 115.6988642 | 79.92737254 | 79.81264948 | 113.6345348 | 83.9633832  | 72.56067293 |
| 3D1 x 3D7 | 29.1 | 136.9227365 | 94.89935517 | 66.83721091 | 110.1512011 | 73.20999159 | 67.25682222 | 117.3635191 | 76.75948    | 67.31321191 |
| 3D1 x 3D7 | 3.1  | 135.5114162 | 132.5341077 | 124.030381  | 130.4991552 | 99.91538214 | 85.47613524 | 144.4285324 | 113.2363191 | 94.00156667 |
| 3D1 x 3D7 | 3.2  | NA          | 107.2703559 | 64.23136177 | NA          | 67.22586355 | 52.98679189 | NA          | 64.34867429 | 51.22074476 |
| 3D1 x 3D7 | 30.1 | 136.137124  | 100.6566617 | 80.20256547 | 83.55256528 | 61.18095386 | 53.02263854 | 88.22787638 | 59.62700433 | 46.67800013 |
| 3D1 x 3D7 | 31.1 | 140.299     | 131.90167   | 115.1181386 | 130.8839768 | 104.23676   | 81.53833    | 132.2737457 | 95.49844333 | 74.93745    |
| 3D1 x 3D7 | 32.1 | 139.6322857 | 133.0101176 | 92.56205882 | 105.6008301 | 84.40129808 | 60.34463636 | 122.6354031 | 103.2017243 | 80.88757446 |
| 3D1 x 3D7 | 33.1 | 137.7362917 | 85.02304286 | 50.20698809 | 129.2478433 | 84.59907667 | 53.65629    | 131.2358743 | 77.19615333 | 54.93131667 |
| 3D1 x 3D7 | 34.1 | 128.8797411 | 80.97609762 | 66.22621944 | 105.5443994 | 74.50585111 | 61.6895031  | 111.4458092 | 83.48721312 | 67.43619141 |
| 3D1 x 3D7 | 34.2 | 135.6100941 | 133.8769663 | 97.29378749 | 130.6120754 | 109.3446677 | 81.57846212 | 124.8864203 | 101.5228742 | 78.99150222 |
| 3D1 x 3D7 | 35.1 | 151.3156667 | 135.808625  | 107.8965833 | 118.443     | 80.05411333 | 64.34767778 | 103.7530875 | 90.82901667 | 80.89579167 |
| 3D1 x 3D7 | 35.2 | 129.0207497 | 106.7253499 | 78.1549258  | 105.7457097 | 77.39811111 | 66.00772917 | 136.0357192 | 99.6603437  | 78.43361119 |
| 3D1 x 3D7 | 36.1 | 129.9945    | 105.3896333 | 69.2704     | 99.90005    | 71.04260833 | 57.93026667 | 108.9648571 | 82.60601429 | 69.52265714 |
| 3D1 x 3D7 | 37.1 | 138.7162725 | 126.4002913 | 93.65840051 | 71.75059888 | 62.1588506  | 60.5575518  | 82.24823684 | 68.06613503 | 61.01281925 |
| 3D1 x 3D7 | 37.2 | 128.931     | 99.48766667 | 79.28011111 | 110.0875    | 76.6515     | 57.3565     | 97.5155     | 66.30625    | 48.82704167 |
| 3D1 x 3D7 | 38.1 | NA          | 133.1666807 | 127.3755176 | NA          | 116.1471719 | 70.44852164 | NA          | 104.3004748 | 88.90872074 |
| 3D1 x 3D7 | 39.1 | NA          | 131.3461301 | 93.78400151 | NA          | 94.60087308 | 74.96788155 | NA          | 89.10517679 | 66.84571429 |
| 3D1 x 3D7 | 4.1  | NA          | 90.05499416 | 73.03173041 | NA          | 52.72491286 | 46.65054381 | NA          | 64.51305291 | 56.62683689 |
| 3D1 x 3D7 | 4.2  | NA          | 124.1556813 | 73.6604533  | NA          | 64.56066044 | 48.38919464 | NA          | 69.79101837 | 56.30538159 |

|           |      |             |             |             |             |             |             |             |             |             |
|-----------|------|-------------|-------------|-------------|-------------|-------------|-------------|-------------|-------------|-------------|
| 3D1 x 3D7 | 40.1 | 141.70531   | 107.8079846 | 82.61208714 | 100.6079834 | 84.92258603 | 75.18412286 | 122.9637647 | 99.98711556 | 85.53970786 |
| 3D1 x 3D7 | 40.2 | 121.3964834 | 78.51984117 | 61.78659825 | 78.12761823 | 61.414025   | 49.45535    | 101.8484005 | 75.96920917 | 55.26850249 |
| 3D1 x 3D7 | 41.1 | 130.7753503 | 97.19234806 | 73.98085974 | 80.533316   | 57.7114879  | 53.42984048 | 97.68310368 | 78.7261676  | 62.48762976 |
| 3D1 x 3D7 | 41.2 | 117.689935  | 95.46783108 | 72.33974667 | 120.7719914 | 100.0805483 | 79.40846226 | 131.0665609 | 105.8263777 | 78.498605   |
| 3D1 x 3D7 | 42.1 | 142.536875  | 113.4659381 | 81.20591    | 131.0386572 | 125.636     | 109.2982334 | 131.7406417 | 129.0642292 | 121.8810209 |
| 3D1 x 3D7 | 42.2 | 139.9364979 | 128.3161324 | 115.6285059 | 137.440968  | 114.3296267 | 93.23377083 | 139.1647589 | 122.5143214 | 89.06352571 |
| 3D1 x 3D7 | 43.1 | 125.9104712 | 76.26142996 | 59.77047929 | 76.55469454 | 60.85553348 | 50.81685893 | 85.7241218  | 60.48627    | 50.08355026 |
| 3D1 x 3D7 | 44.1 | 135.1108    | 110.750666  | 76.83469026 | 104.6690036 | 73.41648379 | 57.1443697  | 122.8837675 | 98.8061257  | 75.23764611 |
| 3D1 x 3D7 | 45.1 | 133.2493889 | 109.9353779 | 87.20926458 | 113.0734917 | 84.49419515 | 76.42185    | 122.0764024 | 88.34963524 | 73.34068333 |
| 3D1 x 3D7 | 46.1 | 142.40395   | 131.890406  | 115.3515167 | 121.0491152 | 79.19920595 | 64.28520524 | 120.4966191 | 86.00835635 | 77.68723691 |
| 3D1 x 3D7 | 46.2 | 103.9169082 | 71.74250997 | 59.35801967 | 84.64489352 | 70.5434067  | 56.17210909 | 106.3485062 | 78.6240503  | 62.95410857 |
| 3D1 x 3D7 | 47.1 | NA          | 148.15      | 137.5893667 | 98.138      | 78.86825    | 64.451      | 100.2993333 | 91.31076667 | 73.99536667 |
| 3D1 x 3D7 | 48.1 | 142.6662994 | 140.8874869 | 112.6236155 | 123.0763619 | 76.02267111 | 60.51474286 | 113.9076738 | 74.77128333 | 56.8428     |
| 3D1 x 3D7 | 48.2 | 132.7349751 | 89.82751422 | 72.52160694 | 101.9810254 | 72.28780165 | 58.44153997 | 119.3008538 | 74.49031914 | 56.38209286 |
| 3D1 x 3D7 | 49.1 | 104.866192  | 78.25491788 | 62.8686925  | 81.2022176  | 58.65756659 | 43.28791212 | 120.2614794 | 92.3313479  | 64.8911899  |
| 3D1 x 3D7 | 49.2 | 140.9522    | 118.044747  | 83.390575   | 124.3443333 | 103.61325   | 91.84045833 | 127.3345452 | 107.1449267 | 81.60776809 |
| 3D1 x 3D7 | 5.1  | NA          | 117.4724124 | 81.57235068 | NA          | 88.41194371 | 68.96772462 | NA          | 110.6734782 | 89.4195342  |
| 3D1 x 3D7 | 5.2  | 136.4810257 | 95.6565312  | 70.62825176 | 118.5702153 | 96.29915757 | 73.24583905 | 116.0068305 | 82.71073195 | 67.58075296 |
| 3D1 x 3D7 | 50.1 | 138.1254355 | 118.2649729 | 96.53738788 | 121.2600262 | 98.56399498 | 81.08327    | 130.294369  | 98.5071941  | 83.51318857 |
| 3D1 x 3D7 | 51.1 | 130.0670719 | 88.1732157  | 50.34719958 | 116.4704617 | 100.4002129 | 86.17416667 | 138.0303553 | 118.9777818 | 97.89570001 |
| 3D1 x 3D7 | 51.2 | 145.73354   | 126.3671257 | 102.5568233 | 90.03249889 | 71.14110791 | 54.30990857 | 76.13278778 | 63.09383397 | 47.22846278 |
| 3D1 x 3D7 | 52.1 | 132.1225505 | 111.8326229 | 83.38598294 | 98.35742868 | 77.84063683 | 62.95922949 | 130.1691795 | 101.9171043 | 82.38034524 |
| 3D1 x 3D7 | 52.2 | 145.1371458 | 138.333125  | 105.03245   | 102.8240625 | 83.50347917 | 64.64826042 | 112.9603583 | 75.57325    | 59.4755     |
| 3D1 x 3D7 | 53.2 | 144.7885    | 134.3973867 | 121.74444   | 136.7690417 | 104.0823125 | 79.99897917 | 134.1033438 | 112.0042042 | 97.91391667 |
| 3D1 x 3D7 | 54.1 | 125.7245038 | 107.8008033 | 96.61177667 | 95.91757393 | 77.67038    | 62.11016667 | 115.3815275 | 90.43367347 | 65.33060674 |



|           |      |             |             |             |             |             |             |             |             |             |
|-----------|------|-------------|-------------|-------------|-------------|-------------|-------------|-------------|-------------|-------------|
| 3D1 x 3D7 | 55.1 | 141.002075  | 133.5922761 | 116.6712278 | 91.99541047 | 70.9634     | 60.9066373  | 100.0572597 | 76.32626667 | 64.16302286 |
| 3D1 x 3D7 | 55.2 | 148.8433191 | 118.5140814 | 93.24240555 | 122.0431391 | 87.61767833 | 61.74316667 | 128.2704688 | 92.63234524 | 64.5694     |
| 3D1 x 3D7 | 56.1 | 126.2931533 | 99.61779999 | 90.84006667 | 72.43056786 | 59.49861429 | 51.64427119 | 107.7752924 | 80.46331472 | 62.45433939 |
| 3D1 x 3D7 | 56.2 | 143.7479312 | 117.6152838 | 84.11179417 | 112.3781365 | 89.13699818 | 67.38544667 | 103.633403  | 83.66261667 | 65.72513333 |
| 3D1 x 3D7 | 57.1 | 131.310289  | 108.6622561 | 79.3535651  | 132.1836299 | 106.4823254 | 70.67171929 | 145.8548178 | 108.3602286 | 80.40545333 |
| 3D1 x 3D7 | 57.2 | 136.3089227 | 101.7280267 | 68.54899584 | 120.1614797 | 102.9056305 | 86.48826857 | 132.9383929 | 108.1800977 | 86.24935    |
| 3D1 x 3D7 | 58.1 | 141.2475465 | 122.043441  | 103.3169964 | 121.9814364 | 77.82913603 | 61.93803531 | 115.7518433 | 78.52296357 | 62.99389238 |
| 3D1 x 3D7 | 59.1 | 137.9244676 | 120.4946433 | 93.36255651 | 109.0218792 | 66.16379343 | 56.00400833 | 100.3726743 | 67.16583788 | 53.87725555 |
| 3D1 x 3D7 | 59.2 | 132.60078   | 81.15803048 | 50.39966    | 82.54733766 | 56.68342857 | 46.95882857 | 89.71904167 | 60.40077976 | 49.0646625  |
| 3D1 x 3D7 | 6.1  | NA          | 93.41434254 | 68.84771718 | NA          | 57.95341286 | 45.03879365 | NA          | 69.62722917 | 66.09039881 |
| 3D1 x 3D7 | 60.2 | 145.262375  | 130.9526875 | 98.77077778 | 114.6155667 | 61.89401428 | 50.57148667 | 102.9869    | 60.81056667 | 50.03586667 |
| 3D1 x 3D7 | 61.1 | 124.452478  | 87.75384171 | 65.20402111 | 75.40455953 | 63.22999915 | 55.97930339 | 91.75474965 | 64.07253333 | 55.5072739  |
| 3D1 x 3D7 | 62.1 | 125.9933989 | 79.39557802 | 59.69427473 | 106.5580009 | 74.18817016 | 51.14752198 | 128.5982939 | 100.96777   | 63.98341    |
| 3D1 x 3D7 | 62.2 | 124.4408159 | 76.57061762 | 65.62779167 | 78.01873371 | 58.81243131 | 53.98816381 | 93.67488833 | 66.53611309 | 54.87406667 |
| 3D1 x 3D7 | 63.1 | 133.1737375 | 118.0319444 | 88.19184653 | 112.8804551 | 88.40741286 | 60.84107429 | 126.1854829 | 82.33631333 | 61.41224286 |
| 3D1 x 3D7 | 64.1 | NA          | 106.5487444 | 76.49073111 | NA          | 95.31878207 | 71.59089    | NA          | 66.42441441 | 56.28366806 |
| 3D1 x 3D7 | 65.1 | 129.4267262 | 121.809479  | 91.16494127 | 117.4588334 | 94.79097143 | 70.55424405 | 124.1708791 | 101.3354929 | 76.91656818 |
| 3D1 x 3D7 | 66.1 | 129.6917941 | 104.0463241 | 73.37228949 | 94.90311463 | 78.34021628 | 64.29825394 | 113.3980429 | 83.80335357 | 67.29928333 |
| 3D1 x 3D7 | 67.1 | 134.8926073 | 111.6200654 | 87.11802254 | 112.5281602 | 82.475125   | 59.93570571 | 137.7336072 | 85.81034226 | 63.99475824 |
| 3D1 x 3D7 | 68.1 | 124.1402381 | 92.11848571 | 70.13685357 | 82.35368809 | 72.62845714 | 63.716      | 118.4946875 | 91.217375   | 75.532125   |
| 3D1 x 3D7 | 68.2 | 144.06475   | 128.6390417 | 89.34975    | 91.018875   | 48.432375   | 39.62333333 | 83.05716667 | 56.93666667 | 43.477      |
| 3D1 x 3D7 | 69.1 | NA          | 120.5982618 | 57.93401032 | NA          | 76.29766893 | 59.30156048 | NA          | 94.96980357 | 67.89861753 |
| 3D1 x 3D7 | 69.2 | 145.4181667 | 126.857975  | 70.13020357 | 91.71168841 | 58.1824377  | 46.55726159 | 87.02538254 | 60.70047619 | 51.30366667 |
| 3D1 x 3D7 | 7.1  | 132.5015709 | 91.46150114 | 76.02591778 | 96.82423341 | 87.68825182 | 75.63258667 | 127.2132401 | 106.1091593 | 82.56958333 |
| 3D1 x 3D7 | 70.1 | 138.9225604 | 116.7144049 | 84.30784231 | 113.9619414 | 76.95461298 | 55.08614556 | 113.8873173 | 78.59654936 | 54.82436239 |

|           |      |             |             |             |             |             |             |             |             |             |
|-----------|------|-------------|-------------|-------------|-------------|-------------|-------------|-------------|-------------|-------------|
| 3D1 x 3D7 | 71.2 | 119.4642417 | 74.62974097 | 81.52620833 | 79.34175128 | 69.86559573 | 63.92911905 | 92.60511042 | 72.98635417 | 64.59934375 |
| 3D1 x 3D7 | 72.1 | 135.1607585 | 114.8528589 | 90.19066742 | 118.8364471 | 106.132657  | 85.20056581 | 131.5317916 | 108.2671471 | 86.20108167 |
| 3D1 x 3D7 | 72.2 | 128.0205253 | 101.0333415 | 78.08121603 | 118.2341122 | 80.19439233 | 65.79632216 | 114.8081555 | 77.62225144 | 60.66963095 |
| 3D1 x 3D7 | 73.1 | 129.7474636 | 101.8440771 | 68.32869333 | 96.87696081 | 71.21999157 | 59.56131524 | 104.5816117 | 69.05347936 | 58.26187524 |
| 3D1 x 3D7 | 74.1 | 134.6715337 | 121.0559872 | 101.7737357 | 111.16535   | 76.40378692 | 64.89848382 | 114.5054034 | 80.10963308 | 75.49383833 |
| 3D1 x 3D7 | 75.1 | 130.3196065 | 104.7133066 | 81.85850476 | 109.3800674 | 94.57603175 | 81.46999905 | 112.1699701 | 94.66611691 | 77.97759524 |
| 3D1 x 3D7 | 75.2 | 129.1837541 | 85.17277272 | 77.54531758 | 90.40055411 | 77.68543802 | 66.83718475 | 98.68646601 | 76.41030705 | 65.0068375  |
| 3D1 x 3D7 | 76.1 | 133.5391    | 119.0110048 | 100.08689   | 108.7695333 | 86.52351619 | 73.31793333 | 125.5714333 | 84.69796    | 73.69570667 |
| 3D1 x 3D7 | 76.2 | 131.9574773 | 100.369903  | 79.43331976 | 131.2627192 | 97.31352948 | 76.97154722 | 138.3672406 | 100.5760292 | 79.03825615 |
| 3D1 x 3D7 | 77.1 | 112.2192307 | 77.31251155 | 83.31881957 | 82.85405324 | 79.43143167 | 63.31244961 | 92.77239034 | 74.17171094 | 62.79830923 |
| 3D1 x 3D7 | 78.1 | 116.7932006 | 87.36882299 | 61.67377469 | 83.61560857 | 68.0388633  | 50.16998321 | 104.2035277 | 76.88833658 | 60.39997778 |
| 3D1 x 3D7 | 79.1 | 133.17      | 112.7085    | 72.31582222 | 104.7686333 | 74.36303333 | 60.6129     | 111.141625  | 84.8306875  | 63.855875   |
| 3D1 x 3D7 | 8.1  | 121.8492468 | 77.59015334 | 78.16812475 | 85.07275989 | 64.00210096 | 53.89652172 | 85.06553007 | 68.07385397 | 59.06951238 |
| 3D1 x 3D7 | 8.2  | 139.2425217 | 129.8859946 | 93.23705232 | 104.8151985 | 71.12934389 | 59.12174048 | 95.33764016 | 75.46994696 | 59.01196341 |
| 3D1 x 3D7 | 80.1 | 116.1126154 | 65.84912121 | 57.30694944 | 96.54146415 | 66.83216952 | 58.0993     | 123.5218227 | 87.43271222 | 64.62689278 |
| 3D1 x 3D7 | 80.2 | 115.7311444 | 86.55267833 | 73.24845952 | 95.45435464 | 91.27937045 | 78.71675    | 94.78494762 | 74.23724643 | 75.01395    |
| 3D1 x 3D7 | 82.1 | 127.1834967 | 82.67500658 | 50.17296659 | 83.42189909 | 54.64328762 | 45.9118     | 97.6490682  | 61.74469299 | 51.14766667 |
| 3D1 x 3D7 | 82.2 | 130.8845429 | 78.89452788 | 61.55035276 | 117.0183546 | 93.47223095 | 83.01379028 | 126.496826  | 98.93255507 | 76.715925   |
| 3D1 x 3D7 | 83.1 | 116.5425241 | 76.03682893 | 69.55818864 | 84.18277488 | 63.14270772 | 52.25750877 | 121.3914298 | 87.54078062 | 67.9946998  |
| 3D1 x 3D7 | 83.2 | NA          | NA          | NA          | 71.722      | 51.673      | 41.856      | NA          | NA          | NA          |
| 3D1 x 3D7 | 84.1 | 122.5390833 | 113.2460833 | 114.0093125 | 138.799919  | 118.12185   | 98.2186     | 142.0643533 | 126.87885   | 108.80015   |
| 3D1 x 3D7 | 84.2 | 139.9358867 | 129.704392  | 114.2944071 | 91.39070024 | 65.82530643 | 57.37835773 | 80.60586943 | 63.94896263 | 56.81418595 |
| 3D1 x 3D7 | 86.2 | 130.90975   | 83.08857917 | 66.333125   | 86.9205     | 59.06973667 | 50.79038    | NA          | NA          | NA          |
| 3D1 x 3D7 | 87.1 | 119.4662    | 72.2639092  | 53.68916104 | 69.94410834 | 55.68082692 | 49.76068006 | 82.79014444 | 54.46703643 | 49.11392333 |
| 3D1 x 3D7 | 88.1 | 128.5371605 | 121.11342   | 97.80528911 | 84.91981648 | 69.77668316 | 61.44299154 | 86.95841158 | 68.23619879 | 60.30950404 |

|           |       |             |             |             |             |             |             |             |             |             |
|-----------|-------|-------------|-------------|-------------|-------------|-------------|-------------|-------------|-------------|-------------|
| 3D1 x 3D7 | 89.1  | 130.0942326 | 124.4101288 | 113.1728922 | 117.874396  | 82.51538977 | 70.30835556 | 137.4089416 | 109.1990627 | 72.33131667 |
| 3D1 x 3D7 | 89.2  | 123.2666667 | 132.5490833 | 123.0581667 | 117.9218691 | 91.89802858 | 69.80549524 | 126.73456   | 101.3191    | 83.42284333 |
| 3D1 x 3D7 | 9.1   | 127.5061178 | 96.33129728 | 74.34117143 | 99.29095116 | 74.66140208 | 59.44418651 | 107.4584133 | 81.72285143 | 60.24218333 |
| 3D1 x 3D7 | 90.1  | 124.1059409 | 78.02744416 | 59.96323818 | 85.30534091 | 60.62567111 | 54.19336667 | 103.7316753 | 75.44853333 | 63.92218    |
| 3D1 x 3D7 | 91.2  | 131.7397859 | 114.3827143 | 102.2866889 | 114.106     | 97.85499893 | 83.90320833 | 127.8512286 | 94.42201667 | 77.04988333 |
| 3D1 x 3D7 | 92.1  | 134.1069473 | 122.2893976 | 82.2742621  | 103.2878176 | 80.5254809  | 56.65332667 | 93.93645363 | 73.42889835 | 56.39866539 |
| 3D1 x 3D7 | 93.1  | 126.0612453 | 106.4070198 | 73.60460364 | 112.6845277 | 98.69777475 | 83.41178572 | 126.2278936 | 106.2318507 | 94.98958333 |
| 3D1 x 3D7 | 93.2  | 140.4458789 | 118.9459466 | 87.0450144  | 111.8445034 | 79.66245576 | 64.34473691 | 106.6398897 | 89.55186246 | 78.64313333 |
| 3D1 x 3D7 | 94.1  | 116.3552507 | 68.77585889 | 58.79182093 | 85.2101035  | 71.15724824 | 54.09736947 | 106.9119375 | 76.44265947 | 65.98349275 |
| 3D1 x 3D7 | 94.2  | 134.3618664 | 123.5504928 | 100.7884533 | 128.7292414 | 108.15678   | 89.42358889 | 138.1719361 | 109.5675905 | 91.57035    |
| 3D1 x 3D7 | 95.1  | 134.8024131 | 129.9026638 | 122.6036508 | 135.5167899 | 125.2594775 | 110.4964441 | 123.9543039 | 111.56085   | 93.16291818 |
| 3D1 x 3D7 | 95.2  | 141.1246189 | 124.4959078 | 100.0641096 | 94.06768127 | 59.70294939 | 53.56043918 | 82.77282723 | 58.54581293 | 53.7420254  |
| 3D1 x 3D7 | 96.1  | 121.5177962 | 63.45879472 | 49.96683043 | 68.57126972 | 55.61269659 | 49.64093087 | 95.12954237 | 64.49154222 | 56.6136747  |
| 3D1 x 3D7 | 96.2  | 124.296238  | 86.67959407 | 70.29780167 | 80.44291685 | 61.8958596  | 54.94391905 | 84.71772647 | 59.71470746 | 53.61638809 |
| 3D1 x 3D7 | 97.1  | 138.1796607 | 100.3891116 | 68.43869268 | 119.1502393 | 78.36920063 | 58.97555714 | 136.962099  | 92.29469121 | 68.41900897 |
| 3D1 x 3D7 | 97.2  | 128.5034806 | 102.2765582 | 64.6266859  | 115.3046029 | 91.96235268 | 77.66428572 | 104.7856744 | 76.8605727  | 65.12964667 |
| 3D1 x 3D7 | 98.1  | 141.210134  | 114.906873  | 92.998      | 89.02942909 | 57.17405951 | 44.84483266 | 83.10620476 | 55.00385238 | 47.99129667 |
| 3D1 x 3D7 | 99.1  | NA          | 110.6977885 | 84.6508166  | NA          | 74.19974585 | 54.27046907 | NA          | 93.19490873 | 70.52173047 |
| 1A5 x 1E4 | A1.1  | 132.5790795 | 63.51353985 | 56.04975215 | 117.6858372 | 99.76006338 | 87.54909508 | 106.8396329 | 65.5010146  | 73.15050697 |
| 1A5 x 1E4 | A10.1 | 142.9830019 | 134.5393723 | 100.0858318 | 106.6643368 | 63.99398022 | 51.21225476 | 108.0828536 | 86.66337922 | 93.15221478 |
| 1A5 x 1E4 | A11.1 | 127.6758367 | 90.22278341 | 98.99613553 | 100.1444955 | 73.21620833 | 59.40346667 | 128.8109878 | 86.88855994 | 72.76998893 |
| 1A5 x 1E4 | A11.2 | 133.1738894 | 86.42442276 | 87.7914685  | 76.62979025 | 60.10945913 | 52.29096156 | 117.7366153 | 97.33199177 | 85.27899593 |
| 1A5 x 1E4 | A12.2 | 144.8502917 | 137.824848  | 118.5203617 | 135.7655886 | 92.82833099 | 86.64696114 | 146.766013  | 143.6718542 | 127.8917814 |
| 1A5 x 1E4 | A13.1 | 140.6154299 | 114.7669524 | 113.7456037 | 92.6217908  | 99.09597842 | 70.50643029 | 109.3177058 | 101.9236541 | 77.0169961  |
| 1A5 x 1E4 | A13.2 | 134.5581563 | 121.4889278 | 116.2314639 | 74.44483159 | 65.60741548 | 72.87964286 | 122.1446957 | 89.13732001 | 75.79855    |

|           |       |             |             |             |             |             |             |             |             |             |
|-----------|-------|-------------|-------------|-------------|-------------|-------------|-------------|-------------|-------------|-------------|
| 1A5 x 1E4 | A14.1 | 138.6986332 | 133.9625169 | 124.2767459 | 135.2878282 | 91.4913371  | 68.21450981 | 66.29180588 | 108.4765724 | 101.2765516 |
| 1A5 x 1E4 | A14.2 | 138.37409   | 116.2342862 | 109.2732059 | 94.84636191 | 64.25854329 | 47.00154242 | 144.1510614 | 116.6752539 | 98.92374286 |
| 1A5 x 1E4 | A16.1 | 135.5075833 | 129.0794425 | 129.0404991 | 100.9680229 | 79.89036855 | 56.38064881 | 147.2335933 | 134.7606533 | 117.8988333 |
| 1A5 x 1E4 | A16.2 | 138.1434167 | 91.82944448 | 85.69151786 | 125.6431238 | 98.42976667 | 74.06099714 | 154.02225   | 144.7092222 | 121.06525   |
| 1A5 x 1E4 | A17.1 | 133.1909728 | 128.9427935 | 110.7885259 | 83.72118406 | 73.47524402 | 44.71963413 | 132.7753152 | 115.5283863 | 108.2860229 |
| 1A5 x 1E4 | A18.1 | 127.3506712 | 115.7412573 | 120.2684069 | 74.74213354 | 72.7874175  | 46.99657182 | 104.4959783 | 73.88110567 | 66.34136313 |
| 1A5 x 1E4 | A18.2 | 129.1399439 | 74.41897701 | 82.52629193 | 81.07931155 | 54.47141143 | 54.61966667 | 117.473407  | 68.28897142 | 69.31737708 |
| 1A5 x 1E4 | A19.1 | 137.3291517 | 129.1016152 | 122.1713675 | 114.8750199 | 65.84285945 | 55.52193956 | 119.6722083 | 100.0062796 | 92.99184349 |
| 1A5 x 1E4 | A2.2  | 133.7945333 | 96.60595476 | 64.67851905 | 90.66408667 | 65.67700333 | 49.69129333 | 129.5042    | 111.9315    | 87.016      |
| 1A5 x 1E4 | A21.1 | 131.0761357 | 87.36033167 | 99.8336711  | 77.3623032  | 77.1727873  | 59.84112778 | 82.71865221 | 82.28084667 | 67.12995879 |
| 1A5 x 1E4 | A21.2 | 139.89555   | 121.0532072 | 118.8668214 | 85.39833333 | 85.99943333 | 55.02743333 | 97.68191667 | 104.1765834 | 68.83288889 |
| 1A5 x 1E4 | A22.1 | 124.4123333 | 104.7658333 | 82.51233333 | 111.5723611 | 67.17516667 | 53.61016667 | 133.24      | 118.28      | 107.0805    |
| 1A5 x 1E4 | A22.2 | 143.0424025 | 133.3678388 | 118.4917771 | 113.454642  | 69.51728251 | 53.39574066 | 142.5509417 | 99.49903252 | 87.42445675 |
| 1A5 x 1E4 | A23.1 | 138.7694893 | 120.1341026 | 103.3632918 | 103.015939  | 77.35675812 | 66.11889222 | 125.6242972 | 91.72923656 | 89.07978099 |
| 1A5 x 1E4 | A23.2 | 137.7155392 | 90.11965742 | 67.08916712 | 104.5964524 | 100.1020111 | 100.7403542 | 148.0114006 | 151.3291591 | 149.3876882 |
| 1A5 x 1E4 | A24.1 | 139.1906869 | 82.51778271 | 72.20053347 | 121.4889598 | 105.8941424 | 97.72690001 | 125.1300802 | 108.1280397 | 99.58680903 |
| 1A5 x 1E4 | A24.2 | 145.1315    | 111.6883334 | 97.05383332 | 116.8624583 | 102.83025   | 73.87679167 | 145.5495    | 146.94375   | 133.596375  |
| 1A5 x 1E4 | A25.1 | 145.9211531 | 122.0976939 | 95.87569646 | 101.2892737 | 89.65724907 | 78.92249136 | 130.3232446 | 103.489721  | 110.4403998 |
| 1A5 x 1E4 | A25.2 | 133.3692643 | 99.25903834 | 105.4285083 | 90.33938416 | 76.71826667 | 66.0684     | 143.825     | 117.5645933 | 99.17278    |
| 1A5 x 1E4 | A26.1 | 135.0252967 | 94.7338896  | 104.8950762 | 78.05405359 | 73.46566768 | 55.37960905 | 129.09845   | 86.65133091 | 107.3535159 |
| 1A5 x 1E4 | A26.2 | 142.7656382 | 107.981773  | 98.26837192 | 109.4252095 | 79.87659524 | 62.435      | 158.6042611 | 142.8583504 | 125.19635   |
| 1A5 x 1E4 | A28.1 | 127.4782045 | 109.6338012 | 109.1889528 | 66.3117875  | 57.32428614 | 45.95409984 | 108.8615133 | 53.98129444 | 68.94106667 |
| 1A5 x 1E4 | A29.1 | 127.9265542 | 113.7188785 | 103.2456775 | 78.40115632 | 63.75651326 | 47.65048667 | 106.6025515 | 96.70824022 | 65.70786497 |
| 1A5 x 1E4 | A3.1  | 132.6597167 | 97.88726001 | 80.17256667 | 101.0009467 | 64.45957333 | 51.65788    | 128.2988981 | 56.36165333 | 84.67344524 |
| 1A5 x 1E4 | A3.2  | 150.6098832 | 140.2116994 | 118.1365329 | 138.9273489 | 101.1325535 | 71.10404692 | 138.5841527 | 131.8159045 | 93.44056161 |

|           |       |             |             |             |             |             |             |             |             |             |
|-----------|-------|-------------|-------------|-------------|-------------|-------------|-------------|-------------|-------------|-------------|
| 1A5 x 1E4 | A30.1 | 151.6194667 | 135.9128616 | 117.2946396 | 87.00642338 | 79.69179206 | 50.802785   | 135.2840417 | 120.7787544 | 77.97255556 |
| 1A5 x 1E4 | A30.2 | 137.0505126 | 115.8981977 | 108.0665547 | 98.05828578 | 64.91121667 | 53.51093333 | 135.9968012 | 86.10851366 | 69.28510392 |
| 1A5 x 1E4 | A31.1 | 143.6752758 | 106.7417029 | 96.71028477 | 89.94646667 | 75.48881191 | 59.91456667 | 160.9419334 | 134.2334167 | 103.78175   |
| 1A5 x 1E4 | A32.1 | 142.0272354 | 131.6329133 | 117.8287005 | 90.59721154 | 83.59696667 | 67.82681    | 127.2505748 | 126.5577364 | 100.3617333 |
| 1A5 x 1E4 | A33.1 | 145.7235333 | 113.524955  | 90.12016667 | 109.6034647 | 99.29941506 | 86.96640095 | 134.4067333 | 127.51079   | 102.10654   |
| 1A5 x 1E4 | A33.2 | 138.4803667 | 116.583269  | 104.6886898 | 101.2511357 | 67.15950955 | 59.63854788 | 119.7407047 | 95.43281282 | 81.59951056 |
| 1A5 x 1E4 | A35.2 | 130.7345987 | 112.9385192 | 112.8132933 | 90.26866116 | 86.43454351 | 68.38337394 | 146.7870439 | 134.38783   | 109.7301907 |
| 1A5 x 1E4 | A36.1 | 143.1481689 | 140.9159657 | 126.3872468 | 132.3760106 | 79.05037815 | 56.64825178 | 107.2926933 | 105.2822248 | 88.01124857 |
| 1A5 x 1E4 | A37.1 | 132.4328367 | 106.1139162 | 101.5665065 | 88.22397422 | 83.11985341 | 46.52782727 | 109.0477078 | 111.4371116 | 74.36529524 |
| 1A5 x 1E4 | A38.1 | 151.6616333 | 143.3072286 | 129.0137833 | 116.8726844 | 85.70714539 | 47.74022143 | 97.70244    | 111.5696067 | 75.79465417 |
| 1A5 x 1E4 | A39.1 | 142.3779717 | 100.6595933 | 83.25163722 | 126.7278746 | 127.627911  | 105.0282276 | 165.6963009 | 155.8281622 | 131.7053457 |
| 1A5 x 1E4 | A39.2 | 138.3859    | 119.5689    | 93.11612667 | 101.123225  | 74.46750833 | 60.41398333 | 108.95705   | 116.69864   | 105.4121667 |
| 1A5 x 1E4 | A4.1  | 110.5555249 | 69.87343665 | 69.66528988 | 96.31039826 | 121.9455877 | 119.0412329 | 147.9205894 | 133.2705481 | 140.1868579 |
| 1A5 x 1E4 | A40.1 | 147.2704205 | 141.3243064 | 122.5631598 | 130.0601929 | 106.3686648 | 61.93760833 | 144.4268333 | 129.10238   | 85.54543333 |
| 1A5 x 1E4 | A40.2 | 129.1255778 | 84.85927951 | 67.89256682 | 125.1018135 | 123.6736914 | 109.3732343 | 149.5326674 | 138.7090651 | 109.08101   |
| 1A5 x 1E4 | A41.1 | 139.7002614 | 117.7233675 | 104.15073   | 74.18158386 | 64.11071678 | 51.12194667 | 124.5683955 | 109.8487445 | 78.1695987  |
| 1A5 x 1E4 | A42.1 | NA          | NA          | NA          | NA          | NA          | NA          | NA          | NA          | NA          |
| 1A5 x 1E4 | A42.2 | 132.6881369 | 87.73847854 | 69.81695714 | 90.6378026  | 74.69791511 | 65.12042619 | 140.2226088 | 137.1479287 | 124.123999  |
| 1A5 x 1E4 | A43.1 | 140.265125  | 137.0129792 | 124.8567917 | 135.7705    | 124.1853333 | 77.39696667 | 153.792     | 129.3958    | 101.4582    |
| 1A5 x 1E4 | A43.2 | 143.5481167 | 131.0605181 | 122.2229895 | 122.0099324 | 99.95770666 | 80.58088524 | 122.5364829 | 87.29904273 | 91.42494152 |
| 1A5 x 1E4 | A44.1 | 148.6290934 | 146.0935148 | 122.0924748 | 101.6941934 | 83.35170286 | 75.08639524 | 130.1571198 | 109.3873122 | 95.5128357  |
| 1A5 x 1E4 | A44.2 | 134.4996991 | 87.59516346 | 71.93589033 | 114.5356663 | 119.348498  | 115.9900301 | 144.4155095 | 142.3938027 | 138.7617523 |
| 1A5 x 1E4 | A45.1 | 144.9642917 | 113.28578   | 82.64723333 | 125.8014576 | 112.8108019 | 95.06084667 | 162.3703786 | 163.50136   | 148.1152    |
| 1A5 x 1E4 | A45.2 | 141.3185667 | 131.8298144 | 117.4909179 | 96.25123021 | 68.70987293 | 57.23838738 | 146.4312421 | 132.4308826 | 108.2757133 |
| 1A5 x 1E4 | A46.1 | 135.5093449 | 100.4376277 | 100.0153823 | 80.11675762 | 75.78519049 | 49.04425626 | 137.8661671 | 125.9194243 | 98.19198129 |

|           |       |             |             |             |             |             |             |             |             |             |
|-----------|-------|-------------|-------------|-------------|-------------|-------------|-------------|-------------|-------------|-------------|
| 1A5 x 1E4 | A46.2 | 137.7198833 | 109.3041105 | 93.9163638  | 86.72292121 | 64.60196162 | 58.24560952 | 126.7294738 | 105.1249029 | 87.81838667 |
| 1A5 x 1E4 | A47.1 | 137.7872733 | 116.3291876 | 100.0947738 | 104.8185105 | 76.61460778 | 57.92884068 | 142.5591921 | 129.3636956 | 114.5495083 |
| 1A5 x 1E4 | A47.2 | 142.0822783 | 131.5754548 | 114.0051174 | 106.2476641 | 88.69771389 | 65.16922857 | 137.117671  | 136.4285155 | 122.9240967 |
| 1A5 x 1E4 | A48.1 | 131.8528889 | 129.8186    | 111.2033833 | 82.30006667 | 72.7424     | 47.5742     | 117.44325   | 109.1277867 | 70.44095    |
| 1A5 x 1E4 | A49.1 | 144.0360333 | 105.3717533 | 98.88207936 | 119.5317333 | 92.00655    | 70.26708333 | 139.8451    | 128.6395667 | 102.08793   |
| 1A5 x 1E4 | A5.1  | 127.6277718 | 73.14858054 | 89.52311273 | 101.7392523 | 72.24244167 | 60.50827857 | 139.5365542 | 100.8558421 | 83.23721442 |
| 1A5 x 1E4 | A50.2 | 138.3679194 | 117.7755948 | 108.19339   | 105.3818867 | 81.13446667 | 69.46616667 | 148.6895625 | 136.74825   | 130.0129667 |
| 1A5 x 1E4 | A51.2 | 134.9260333 | 132.9756857 | 124.3790071 | 128.274603  | 79.17764286 | 44.30346667 | 92.30891667 | 100.493725  | 60.62627333 |
| 1A5 x 1E4 | A53.2 | 137.8274533 | 127.4843683 | 124.565385  | 101.324893  | 63.30901714 | 50.21866667 | 115.1636467 | 101.11245   | 86.37755    |
| 1A5 x 1E4 | A54.1 | 132.415     | 122.4978333 | 107.9678333 | 125.1972084 | 88.47916665 | 71.74841667 | 124.8423333 | 112.5528333 | 93.0335     |
| 1A5 x 1E4 | A54.2 | 122.9869589 | 117.3784516 | 111.5344056 | 80.88426667 | 75.64437619 | 60.18197143 | 129.93235   | 119.0513889 | 81.52066667 |
| 1A5 x 1E4 | A55.1 | 142.418575  | 90.408695   | 88.52519278 | 89.47980556 | 83.7371     | 64.88553333 | 114.7867333 | 98.26295    | 76.46991667 |
| 1A5 x 1E4 | A55.2 | 135.1555    | 107.0047    | 111.5239    | 84.33645833 | 82.42841667 | 44.81225    | 106.942625  | 56.35675    | 83.65645833 |
| 1A5 x 1E4 | A57.1 | 131.9742191 | 85.32011667 | 58.15598333 | 103.9768238 | 80.77416429 | 66.37371    | 117.5860333 | 117.7001    | 90.777875   |
| 1A5 x 1E4 | A59.1 | 127.96256   | 114.0855933 | 96.89270665 | 79.91454167 | 81.53592857 | 61.7538     | 139.5225917 | 119.3076167 | 79.76961667 |
| 1A5 x 1E4 | A59.2 | 132.5115    | 144.2213334 | 125.201     | 121.147875  | 100.214375  | 68.043375   | 163.802     | 142.084     | 120.7175    |
| 1A5 x 1E4 | A6.1  | 132.7965971 | 130.4159867 | 119.3923019 | 74.84744893 | 69.4330004  | 60.62271333 | 126.506097  | 141.3996621 | 143.7859211 |
| 1A5 x 1E4 | A60.1 | 145.78355   | 119.3120317 | 99.76969842 | 107.4881528 | 87.20307333 | 72.61015    | 153.5468724 | 143.1628584 | 107.382445  |
| 1A5 x 1E4 | A60.2 | 131.0936047 | 84.02562233 | 77.72023658 | 111.9049391 | 99.26510683 | 84.26126    | 135.8522742 | 126.2155284 | 110.2238298 |
| 1A5 x 1E4 | A62.1 | NA          | NA          | NA          | NA          | NA          | NA          | NA          | NA          | NA          |
| 1A5 x 1E4 | A62.2 | 139.6797801 | 124.14506   | 115.8640572 | 80.90529689 | 83.80021234 | 59.68796889 | 128.8021144 | 128.9199584 | 94.39715491 |
| 1A5 x 1E4 | A63.1 | 128.9855294 | 114.1023754 | 110.6916741 | 96.86473332 | 89.50750335 | 60.19971524 | 126.8765    | 101.96475   | 82.215625   |
| 1A5 x 1E4 | A63.2 | 143.1964801 | 131.1013224 | 121.0491986 | 126.481857  | 95.21814883 | 64.3777141  | 120.996454  | 107.6633833 | 86.29578408 |
| 1A5 x 1E4 | A64.1 | 129.211285  | 92.07845761 | 90.28865065 | 106.2831761 | 76.93611966 | 69.79676278 | 131.5425586 | 106.0642833 | 83.11237    |
| 1A5 x 1E4 | A66.1 | 133.4675407 | 116.9485872 | 110.0947785 | 95.81794348 | 62.53737672 | 53.71243071 | 129.2341556 | 108.2874429 | 85.72849524 |

|           |       |             |             |             |             |             |             |             |             |             |
|-----------|-------|-------------|-------------|-------------|-------------|-------------|-------------|-------------|-------------|-------------|
| 1A5 x 1E4 | A66.2 | 134.7839333 | 90.15729001 | 66.9965     | 128.4970965 | 95.47460714 | 73.06184643 | 148.285     | 143.60954   | 130.4062    |
| 1A5 x 1E4 | A8.1  | 125.4681583 | 120.930332  | 104.5378498 | 89.98524407 | 56.86299865 | 45.65538413 | 129.5496293 | 112.0432488 | 89.11155095 |
| 1A5 x 1E4 | A9.1  | 119.4421308 | 78.12743333 | 78.86890385 | 62.04392204 | 57.30012535 | 71.60754842 | 125.0787143 | 117.6950194 | 89.0731049  |
| 1A5 x 1E4 | A9.2  | 130.35401   | 75.25609841 | 67.92827957 | 119.3472766 | 94.03320782 | 71.80053214 | 157.7818671 | 144.7443084 | 123.0305747 |
| 1A5 x 1E4 | B1.1  | 128.5080333 | 109.614325  | 100.0280667 | 99.58846    | 86.51501333 | 61.303      | 109.0359375 | 105.55452   | 62.229      |
| 1A5 x 1E4 | B1.3  | 128.0616947 | 96.35146621 | 94.00783356 | 81.64581055 | 70.25627641 | 63.28457603 | 144.9114646 | 128.7444737 | 93.80936044 |
| 1A5 x 1E4 | B10.1 | 129.7614788 | 111.3268313 | 100.7267792 | 76.29773133 | 60.95323164 | 44.08152987 | 117.9937711 | 86.2285683  | 70.93620545 |
| 1A5 x 1E4 | B10.2 | 135.2359228 | 106.7759484 | 102.1226727 | 101.368487  | 80.73537521 | 66.79540805 | 125.1993446 | 103.3987878 | 98.62729286 |
| 1A5 x 1E4 | B11.1 | 141.7384965 | 115.6457832 | 98.3688306  | 82.5369656  | 67.69005643 | 59.29933333 | 119.9751621 | 103.9971897 | 88.38618017 |
| 1A5 x 1E4 | B12.1 | 141.5255035 | 132.42609   | 121.9116829 | 139.7456425 | 95.81670814 | 62.2581548  | 108.3949184 | 111.6018044 | 85.49447619 |
| 1A5 x 1E4 | B13.2 | 130.0131    | 120.1087667 | 110.36835   | 84.93360571 | 67.01679333 | 57.68346667 | 118.7979    | 122.4579    | 89.53116667 |
| 1A5 x 1E4 | B14.1 | 125.1453322 | 86.09613634 | 97.7787486  | 115.6244924 | 105.1143541 | 89.08824666 | 114.9433221 | 128.2443436 | 118.5328107 |
| 1A5 x 1E4 | B15.1 | NA          | NA          | NA          | NA          | NA          | NA          | NA          | NA          | NA          |
| 1A5 x 1E4 | B16.1 | 129.7618295 | 134.448456  | 103.3734042 | 65.03256726 | 60.93242853 | 52.00648409 | 73.53937857 | 94.49350167 | 56.07600714 |
| 1A5 x 1E4 | B16.2 | 133.5910267 | 74.03923035 | 69.45972476 | 122.0592316 | 114.44024   | 106.36536   | 151.0714667 | 147.8694422 | 143.1907333 |
| 1A5 x 1E4 | B17.1 | 134.194713  | 86.2012914  | 78.49137286 | 78.77827026 | 66.37804532 | 62.76420778 | 134.2188009 | 110.7325069 | 92.63421056 |
| 1A5 x 1E4 | B17.2 | 137.9435833 | 101.0213756 | 91.02327143 | 98.70439334 | 67.32458667 | 54.1888     | 144.2077778 | 130.3613533 | 108.3912667 |
| 1A5 x 1E4 | B18.1 | 144.6246333 | 141.1399    | 97.1924     | 134.7702    | 103.47165   | 100.9975833 | 158.1511    | 159.7602222 | 143.9955    |
| 1A5 x 1E4 | B18.2 | 134.8159594 | 110.8981636 | 108.906787  | 101.8989477 | 81.14125481 | 63.77520404 | 126.5698357 | 135.5055404 | 105.9267589 |
| 1A5 x 1E4 | B19.1 | 136.1340571 | 125.9591277 | 114.6866234 | 103.1804196 | 80.34716845 | 50.12216901 | 130.2656447 | 106.6616476 | 88.86485843 |
| 1A5 x 1E4 | B19.2 | 141.0155083 | 113.1531694 | 108.5638875 | 107.0559149 | 95.47190223 | 85.45019024 | 146.2291833 | 141.7172598 | 139.7296997 |
| 1A5 x 1E4 | B20.1 | 143.55828   | 113.5642566 | 67.96673286 | 118.3602919 | 103.6283588 | 84.93420309 | 145.6275634 | 135.632825  | 123.7297079 |
| 1A5 x 1E4 | B20.2 | 139.1774103 | 95.37115429 | 78.74335848 | 119.1122956 | 84.16932738 | 75.4789     | 148.5363373 | 138.4223522 | 126.9171271 |
| 1A5 x 1E4 | B21.1 | 161.281     | NA          | NA          | 112.739     | 96.318      | 94.502      | 147.4275    | 152.4523333 | 142.8315    |
| 1A5 x 1E4 | B22.1 | 132.7680006 | 83.11662486 | 75.07489622 | 112.2363388 | 117.160774  | 105.0957764 | 125.4875486 | 122.7314557 | 113.0768567 |

|           |       |             |             |             |             |             |             |             |             |             |
|-----------|-------|-------------|-------------|-------------|-------------|-------------|-------------|-------------|-------------|-------------|
| 1A5 x 1E4 | B22.2 | 139.1952627 | 123.481887  | 115.0993309 | 111.0737396 | 91.70052183 | 81.72054181 | 148.61088   | 144.0961076 | 138.16405   |
| 1A5 x 1E4 | B23.1 | 137.1044352 | 130.9171317 | 117.246215  | 100.7991559 | 89.16327714 | 76.867305   | 135.9359895 | 137.8761842 | 140.965961  |
| 1A5 x 1E4 | B24.1 | 132.4782599 | 130.605809  | 117.1873413 | 85.14666827 | 68.91424936 | 49.44348434 | 110.4923662 | 91.05316673 | 80.97807053 |
| 1A5 x 1E4 | B24.2 | 137.2404799 | 134.8213389 | 124.7277361 | 95.47497071 | 99.256425   | 61.31818333 | 117.2651516 | 87.30823556 | 96.51404857 |
| 1A5 x 1E4 | B25.1 | 130.7955455 | 90.37751187 | 92.60034262 | 82.10492569 | 61.00173175 | 54.13857283 | 110.164525  | 65.89980064 | 71.12189611 |
| 1A5 x 1E4 | B26.1 | 132.1237159 | 122.4718224 | 119.1080457 | 98.58230511 | 86.70305286 | 64.60113429 | 151.1460755 | 141.3617091 | 107.3603071 |
| 1A5 x 1E4 | B27.1 | 138.085921  | 102.9919718 | 100.6205989 | 108.3601161 | 85.31249987 | 77.30130892 | 142.9945053 | 116.1073948 | 76.95035833 |
| 1A5 x 1E4 | B28.1 | 141.1243435 | 116.7684836 | 91.97350862 | 100.0655125 | 88.89748809 | 80.6754     | 144.090426  | 137.5373225 | 130.2682758 |
| 1A5 x 1E4 | B28.2 | 143.23725   | 89.97300333 | 74.10408    | 95.73631429 | 65.6586     | 60.23148    | 143.35475   | 121.8797333 | 119.3861    |
| 1A5 x 1E4 | B29.1 | 138.4255    | 131.5315    | 115.6945    | 109.6045    | 75.2175     | 58.4075     | 140.9045    | 133.4095    | 101.734     |
| 1A5 x 1E4 | B3.1  | 132.6958875 | 112.90655   | 98.81697    | 89.40645167 | 64.63610667 | 50.94798667 | 115.2772333 | 125.364625  | 76.91194    |
| 1A5 x 1E4 | B30.1 | 137.9884309 | 96.2201925  | 77.0611681  | 100.7175396 | 105.8821973 | 84.97631809 | 132.713852  | 134.526945  | 114.8883433 |
| 1A5 x 1E4 | B31.1 | 138.1798667 | 117.766325  | 111.62      | 102.32775   | 91.720125   | 60.218      | 127.274     | 123.789     | 103.3935    |
| 1A5 x 1E4 | B31.2 | 131.6718945 | 120.8216799 | 113.6070354 | 113.2249022 | 104.7102111 | 89.53248    | 157.8152    | 128.3234738 | 108.36704   |
| 1A5 x 1E4 | B32.1 | 138.7214013 | 75.69165808 | 71.08225076 | 94.63540622 | 67.40480401 | 55.67591111 | 122.7344765 | 107.4379494 | 88.13497974 |
| 1A5 x 1E4 | B32.2 | 135.5626167 | 134.5339833 | 117.1776733 | 95.25105833 | 70.01573333 | 59.57763    | 151.197     | 153.7325    | 136.5776667 |
| 1A5 x 1E4 | B33.1 | 145.205288  | 137.2626367 | 122.3737256 | 96.48070661 | 72.52905247 | 50.95451154 | 137.75206   | 126.8075433 | 93.34935953 |
| 1A5 x 1E4 | B33.2 | 129.4767367 | 84.21919384 | 81.64606525 | 118.055901  | 67.63995833 | 53.07055556 | 133.6182843 | 65.72365585 | 61.25066667 |
| 1A5 x 1E4 | B34.2 | 129.5802086 | 131.3973956 | 116.418814  | 106.0849396 | 66.90673429 | 55.45728333 | 86.79510417 | 103.5976976 | 73.20078333 |
| 1A5 x 1E4 | B35.1 | 138.1842385 | 74.32456511 | 69.73116667 | 111.6035597 | 75.78205455 | 62.16727667 | 141.8544567 | 143.3892196 | 122.3254108 |
| 1A5 x 1E4 | B35.2 | 135.4471357 | 128.4571441 | 115.5542085 | 69.391025   | 64.1969     | 60.39947714 | 127.42976   | 112.3707067 | 91.62565238 |
| 1A5 x 1E4 | B37.1 | 130.8659178 | 99.83010384 | 68.32395179 | 87.25136667 | 65.12884889 | 57.67602857 | 147.279525  | 119.3171667 | 117.7047958 |
| 1A5 x 1E4 | B37.3 | 137.8295732 | 126.0171412 | 97.15215625 | 109.0527674 | 112.7640119 | 94.7834375  | 155.66806   | 154.8043276 | 145.4118033 |
| 1A5 x 1E4 | B38.1 | 139.4165383 | 90.644215   | 95.60740714 | 113.5009139 | 79.06933333 | 67.25332667 | 144.1964667 | 77.4182     | 79.48383333 |
| 1A5 x 1E4 | B39.1 | 130.5622126 | 112.0812618 | 105.8642321 | 111.6439901 | 97.40146021 | 95.1614724  | 136.5257681 | 141.2983541 | 136.4894674 |



|           |       |             |             |             |             |             |             |             |             |             |
|-----------|-------|-------------|-------------|-------------|-------------|-------------|-------------|-------------|-------------|-------------|
| 1A5 x 1E4 | B39.2 | 139.6081707 | 133.3632509 | 112.6192921 | 124.8674568 | 104.4782996 | 98.44952666 | 145.1739729 | 140.84618   | 132.1983088 |
| 1A5 x 1E4 | B4.1  | 143.7639931 | 116.029286  | 94.53149554 | 103.4939681 | 91.75732202 | 73.96416714 | 144.9810334 | 132.5640737 | 111.5671869 |
| 1A5 x 1E4 | B4.2  | 131.2955    | 117.5425    | 105.1417333 | 96.475405   | 91.82979166 | 66.51614167 | 129.89125   | 101.298625  | 101.735375  |
| 1A5 x 1E4 | B40.2 | 140.842375  | 111.5995    | 77.0483     | 82.96198333 | 70.7223     | 57.70006667 | 156.3395    | 155.563     | 131.889     |
| 1A5 x 1E4 | B41.1 | 134.516229  | 86.44480663 | NA          | 112.5749542 | 92.64829143 | 80.1234005  | 140.2502783 | 127.1528203 | 120.3244413 |
| 1A5 x 1E4 | B42.1 | 138.3251411 | 108.6528    | 82.67801667 | 122.85721   | 129.11522   | 126.6996667 | 164.1462029 | 163.6769167 | 135.62272   |
| 1A5 x 1E4 | B42.2 | 124.0168373 | 82.61479515 | 78.6627503  | 72.72879522 | 68.23400212 | 66.48560664 | 128.7297522 | 109.9260841 | 97.19888542 |
| 1A5 x 1E4 | B42.3 | 139.0953334 | 108.9238333 | 69.73733333 | 114.30975   | 93.47453    | 88.59615    | 157.1938333 | 155.2893333 | 126.9715    |
| 1A5 x 1E4 | B43.1 | 133.9527683 | 109.2556533 | 104.7310197 | 82.57884483 | 65.07837936 | 50.98952084 | 150.2178182 | 122.6348206 | 114.1586252 |
| 1A5 x 1E4 | B44.1 | 138.6275192 | 94.18028024 | NA          | 103.9329205 | 94.62070348 | 80.38115673 | 140.5590853 | 113.6569681 | 102.418449  |
| 1A5 x 1E4 | B45.1 | 141.4474554 | 134.1595908 | 123.0438228 | 132.423774  | 82.70684485 | 56.22325095 | 138.007628  | 122.306676  | 89.36502035 |
| 1A5 x 1E4 | B45.2 | 145.98095   | 99.9948     | 73.1593     | 101.7535133 | 67.3481     | 58.01701667 | 151.1516667 | 118.6985    | 105.15125   |
| 1A5 x 1E4 | B46.1 | 137.536422  | 118.4371207 | 95.99732728 | 96.34851139 | 67.18737949 | 61.8608419  | 134.4066159 | 83.1526283  | 82.89940476 |
| 1A5 x 1E4 | B46.2 | 129.8602201 | 126.1781683 | 113.1956278 | 103.2035306 | 73.75895549 | 55.15816306 | 123.8968548 | 122.8148559 | 109.6998867 |
| 1A5 x 1E4 | B48.1 | 139.5879353 | 106.4159279 | 100.5809852 | 84.82881424 | 72.57909064 | 51.74898064 | 141.7865768 | 138.7888194 | 110.5240635 |
| 1A5 x 1E4 | B48.2 | 125.8614879 | 99.08073353 | 85.89214108 | 113.1137093 | 91.55285228 | 75.291      | 116.7033886 | 95.15253005 | 96.09366195 |
| 1A5 x 1E4 | B49.1 | 144.1564905 | 128.2497613 | 107.9341162 | 102.2783771 | 64.61570659 | 55.92975    | 151.9002381 | 125.6348067 | 109.9867951 |
| 1A5 x 1E4 | B50.1 | 123.5875    | 117.2452467 | 109.7721067 | 87.98448667 | 65.15776666 | 46.90643333 | 124.8872833 | 80.4757     | 63.03908667 |
| 1A5 x 1E4 | B50.2 | 125.7868333 | 115.5642397 | 112.0851997 | 82.99202222 | 81.74185985 | 60.19221778 | 125.9008964 | 106.0321041 | 84.75310131 |
| 1A5 x 1E4 | B51.1 | 133.1131879 | 105.2627535 | 101.976049  | 104.1805617 | 68.71855487 | 62.54118571 | 133.9954808 | 137.3796131 | 121.9296723 |
| 1A5 x 1E4 | B7.1  | 141.9079791 | 137.258303  | 126.6419826 | 106.7360542 | 105.71044   | 65.07901571 | 133.7761673 | 123.5348667 | 90.19001334 |
| 1A5 x 1E4 | B9.1  | 138.2268579 | 131.4043573 | 116.7382508 | 106.0870073 | 76.30081809 | 61.07464762 | 115.75994   | 115.2124667 | 67.37472    |
| 1A5 x 1E4 | B9.2  | 138.9647485 | 106.3165457 | 76.89690721 | 75.47834298 | 57.71783262 | 44.56008222 | 134.5449572 | 97.43468388 | 79.94560434 |
| 1A5 x 1E4 | C1.1  | 127.5245389 | 73.64792524 | 59.50207372 | 102.8008739 | 71.10956455 | 54.34925    | 142.7621974 | 118.399576  | 108.3362155 |
| 1A5 x 1E4 | C1.2  | 137.13525   | 124.0585    | 119.613     | 102.7106667 | 88.32183333 | 62.7545     | 125.93325   | 117.778     | 97.4685     |

|           |       |             |             |             |             |             |             |             |             |             |
|-----------|-------|-------------|-------------|-------------|-------------|-------------|-------------|-------------|-------------|-------------|
| 1A5 x 1E4 | C10.1 | 135.7489835 | 102.8437168 | 104.2433061 | 123.0122465 | 74.51611475 | 41.02894311 | 155.2625376 | 106.4701828 | 83.57872073 |
| 1A5 x 1E4 | C11.1 | 145.2241476 | 119.57814   | 96.4371875  | 109.1291333 | 104.2816667 | 97.54918    | 166.7965556 | 163.2025167 | 155.0664444 |
| 1A5 x 1E4 | C12.1 | 141.5438286 | 116.2443784 | 111.7239715 | 120.0890667 | 90.20245    | 60.10815889 | 135.2768423 | 105.329946  | 94.72405238 |
| 1A5 x 1E4 | C12.2 | NA          | NA          | NA          | NA          | NA          | NA          | NA          | NA          | NA          |
| 1A5 x 1E4 | C13.1 | 127.5553165 | 89.29952628 | 94.7013492  | 80.26816015 | 68.84060641 | 55.70192794 | 159.1511333 | 115.75638   | 107.5439222 |
| 1A5 x 1E4 | C14.1 | 140.0680891 | 94.98631877 | 95.71696463 | 109.4511264 | 80.23738481 | 62.09112641 | 147.3266742 | 114.4920824 | 115.2885183 |
| 1A5 x 1E4 | C16.1 | 138.7354529 | 84.7587192  | 72.29394432 | 95.850793   | 62.87359295 | 53.86069818 | 132.718665  | 101.5904968 | 86.95619487 |
| 1A5 x 1E4 | C16.2 | 123.876625  | 101.60025   | 105.815     | 103.3781    | 70.4133     | 74.5273     | 128.853     | 98.4185     | 96.89175    |
| 1A5 x 1E4 | C16.3 | 138.3346675 | 96.76493328 | 93.44512333 | 90.91069442 | 66.09414475 | 62.871395   | 126.9855567 | 74.22889206 | 88.79056627 |
| 1A5 x 1E4 | C17.1 | 142.7215644 | 132.9026265 | 120.3982217 | 91.45934417 | 77.86443056 | 59.03718127 | 152.5392766 | 139.4103952 | 131.6338833 |
| 1A5 x 1E4 | C19.1 | 146.3476967 | 127.4464732 | 109.5807119 | 88.94753714 | 75.80795821 | 58.79238827 | 144.7334518 | 139.387173  | 133.4559239 |
| 1A5 x 1E4 | C2.1  | 131.7234601 | 95.27911065 | 101.0985851 | 105.8110037 | 71.64244635 | 63.26905714 | 153.0798486 | 115.353605  | 93.98769714 |
| 1A5 x 1E4 | C2.2  | 130.1316827 | 91.51264895 | 73.99062026 | 114.6030851 | 89.83661606 | 62.46781857 | 121.0379009 | 99.52963007 | 81.57816282 |
| 1A5 x 1E4 | C20.1 | 129.6544431 | 97.80093213 | 93.48593444 | 81.9401527  | 54.928691   | 41.28602424 | NA          | NA          | 98.216      |
| 1A5 x 1E4 | C20.2 | 137.724285  | 107.2917967 | 99.59888166 | 102.029189  | 79.40390357 | 60.38620857 | 154.0035341 | 125.6119964 | 102.2982833 |
| 1A5 x 1E4 | C21.1 | 119.3093315 | 81.55554787 | 80.78540189 | 89.29023655 | 49.10955738 | 43.15654314 | 137.2280196 | 108.9856075 | 73.88662927 |
| 1A5 x 1E4 | C21.2 | 126.0507262 | 108.9028131 | 108.8525581 | 86.17175569 | 70.07317212 | 54.06693333 | 156.7422    | 135.6315667 | 114.9175625 |
| 1A5 x 1E4 | C22.1 | 142.8353514 | 117.1007588 | 107.536309  | 78.11042204 | 69.69702157 | 60.36667167 | 156.3499396 | 133.8794199 | 142.9835    |
| 1A5 x 1E4 | C22.2 | 144.4536667 | 130.71475   | 87.423375   | 135.0869333 | 117.45825   | 102.525875  | 148.87225   | 156.6655    | 137.7085    |
| 1A5 x 1E4 | C23.1 | 136.2338078 | 117.4659515 | 103.4335346 | 91.27405506 | 53.80671236 | 52.37190333 | 153.576576  | 114.5450588 | 101.9189507 |
| 1A5 x 1E4 | C23.2 | 128.4643228 | 95.25976012 | 102.7280243 | 126.1464875 | 90.05688529 | 80.27681131 | 124.903625  | 110.5636667 | 78.76466667 |
| 1A5 x 1E4 | C24.1 | 134.0582105 | 69.64222597 | 51.00982212 | 100.8950475 | 76.25730486 | 66.52643405 | 180.047     | 106.9842071 | 100.3839756 |
| 1A5 x 1E4 | C24.2 | 132.1045    | 105.756875  | 73.69875    | 137.6296458 | 128.115375  | 115.4746042 | 159.4175    | 162.1505    | 163.062     |
| 1A5 x 1E4 | C25.1 | 136.0160391 | 70.41153283 | 60.80436321 | 79.59059306 | 57.87156142 | 48.97869889 | 115.7216251 | 85.76035522 | 70.39166526 |
| 1A5 x 1E4 | C26.1 | 133.9156975 | 118.9206149 | 82.16869582 | 65.68936975 | 67.49848356 | 77.6047823  | 163.5146433 | 150.9274457 | 144.0472689 |

|           |       |             |             |             |             |             |             |             |             |             |
|-----------|-------|-------------|-------------|-------------|-------------|-------------|-------------|-------------|-------------|-------------|
| 1A5 x 1E4 | C27.1 | 132.8423309 | 80.06154592 | 72.90514286 | 94.55936737 | 72.61621597 | 59.69446429 | 168.8231659 | 151.2485923 | 131.9449827 |
| 1A5 x 1E4 | C27.2 | 136.3252721 | 131.1158003 | 118.3307716 | 83.82705264 | 64.8126165  | 53.34550718 | 139.4995522 | 120.2966596 | 92.59595913 |
| 1A5 x 1E4 | C28.1 | 130.479069  | 116.6854858 | 113.4424294 | 76.85163926 | 65.87534538 | 51.76089143 | 158.69825   | 91.24401118 | 84.80298818 |
| 1A5 x 1E4 | C28.2 | 130.1669992 | 73.85098107 | 64.27348104 | 117.9577885 | 110.2962957 | 96.22513    | 130.6200046 | 101.4368999 | 89.23253304 |
| 1A5 x 1E4 | C29.2 | 139.6823971 | 115.5535913 | 116.9444255 | 116.1837258 | 101.136391  | 69.34035233 | 138.7755714 | 71.40249167 | 94.63641666 |
| 1A5 x 1E4 | C3.1  | 140.3301186 | 103.9566103 | 85.83152333 | 100.8894152 | 79.92450564 | 71.98861778 | 160.2839909 | 152.0471128 | 134.8799714 |
| 1A5 x 1E4 | C3.2  | 134.5841893 | 83.11963697 | 64.99290286 | 134.9947094 | 121.7876562 | 119.1931122 | 140.8284822 | 132.8992663 | 140.1654556 |
| 1A5 x 1E4 | C30.1 | 151.5715786 | 136.1510761 | 125.9742967 | 130.5114987 | 71.17414216 | 64.29031753 | 152.0555    | 104.8751432 | 87.51754444 |
| 1A5 x 1E4 | C30.2 | 134.1023547 | 101.4425202 | 104.2191254 | 103.6012222 | 77.6689329  | 69.2841875  | 105.0896244 | 108.153301  | 100.4925355 |
| 1A5 x 1E4 | C31.1 | 147.838     | 132.5845    | 127.7885    | 104.2463333 | 63.38866667 | 52.29133333 | NA          | NA          | NA          |
| 1A5 x 1E4 | C32.1 | 132.71918   | 123.9616664 | 117.9231526 | 111.9334998 | 73.90874889 | 58.08241587 | NA          | 105.920547  | 79.74651167 |
| 1A5 x 1E4 | C32.2 | 139.7737333 | 108.1751167 | 101.287285  | 90.73287333 | 83.4193246  | 69.37380476 | 155.6486189 | 146.256621  | 133.6010238 |
| 1A5 x 1E4 | C33.1 | 137.1705296 | 108.964665  | 89.44336111 | 105.4674609 | 72.76378988 | 71.56895119 | 139.1918049 | 99.99494887 | 74.45681429 |
| 1A5 x 1E4 | C33.2 | 139.369881  | 102.1718115 | 87.10281092 | 120.0569589 | 113.02144   | 116.1991933 | 140.0506445 | 112.9342417 | 125.7985167 |
| 1A5 x 1E4 | C34.1 | 147.5775536 | 136.6016341 | 125.677171  | 84.93427605 | 74.52785824 | 63.50498952 | 149.1029315 | 137.8857736 | 133.915305  |
| 1A5 x 1E4 | C34.2 | 130.321625  | 123.4813333 | 120.4628667 | 86.26383333 | 88.465625   | 56.985      | 144.7725556 | 87.6595     | 50.91175    |
| 1A5 x 1E4 | C35.1 | 142.3662227 | 128.8896975 | 109.3473719 | 113.666039  | 60.78977044 | 47.9867019  | 108.5758444 | 84.48499945 | 85.3406602  |
| 1A5 x 1E4 | C36.1 | 127.0308333 | 86.16389583 | 86.6175625  | 72.6855     | 81.30425    | 96.0484     | 162.3046667 | 150.5595833 | 154.282875  |
| 1A5 x 1E4 | C38.1 | 147.0651333 | 116.3787813 | 83.46219444 | 120.3935724 | 101.3347627 | 94.37235556 | 151.9736667 | 141.5345226 | 144.3460167 |
| 1A5 x 1E4 | C38.2 | 118.9603417 | 80.41088214 | 92.51217917 | 76.26142218 | 67.45820698 | 57.08816964 | 133.4716438 | 103.8560554 | 89.45447619 |
| 1A5 x 1E4 | C4.1  | 125.6319663 | 77.58713649 | 95.82068889 | 105.4003852 | 69.62644459 | 59.70382333 | 110.3769072 | 79.09003818 | 73.12279333 |
| 1A5 x 1E4 | C4.2  | 121.7002894 | 77.88447504 | 77.51602175 | 99.36923833 | 77.58271452 | 66.40835857 | 146.0494667 | 100.08159   | 98.63253999 |
| 1A5 x 1E4 | C41.1 | 147.7500086 | 109.7750465 | 89.49132975 | 102.2181195 | 93.64220574 | 76.24140111 | 157.3657333 | 108.3418756 | 94.90216883 |
| 1A5 x 1E4 | C41.2 | 139.0121882 | 133.2154852 | 115.915477  | 120.1366951 | 91.64463783 | 74.86228604 | 143.0756151 | 145.9642432 | 128.0395209 |
| 1A5 x 1E4 | C42.1 | 144.6483969 | 98.84638462 | 69.41314795 | 106.0900022 | 93.79166952 | 92.66941667 | 139.81129   | 130.8678591 | 131.2997667 |

|           |       |             |             |             |             |             |             |             |             |             |
|-----------|-------|-------------|-------------|-------------|-------------|-------------|-------------|-------------|-------------|-------------|
| 1A5 x 1E4 | C42.2 | 142.6855625 | 131.8754042 | 122.3299678 | 106.7901857 | 77.17219881 | 54.20860571 | 141.3477667 | 124.2586    | 102.3181    |
| 1A5 x 1E4 | C44.1 | 141.4718384 | 106.8179153 | 103.8437758 | 86.13929075 | 75.16571905 | 53.4784     | 107.8652784 | 83.54049013 | 87.41918385 |
| 1A5 x 1E4 | C44.2 | 138.0350445 | 117.0016017 | 103.2994714 | 107.3702259 | 93.90524666 | 82.03859048 | 154.0073542 | 147.6823111 | 148.3282667 |
| 1A5 x 1E4 | C45.1 | 137.5851776 | 94.36936982 | 90.00061948 | 88.56857445 | 87.04234333 | 65.62448286 | 125.5999722 | 104.5545349 | 83.58703481 |
| 1A5 x 1E4 | C45.2 | 136.0938333 | 92.10665909 | 71.24163691 | 139.43201   | 128.9586983 | 120.74786   | 156.2096506 | 158.758505  | 145.57049   |
| 1A5 x 1E4 | C48.1 | 132.4121205 | 127.8426862 | 116.1254657 | 85.69619206 | 80.82021031 | 56.40029    | 100.51829   | 126.6741792 | 75.9943     |
| 1A5 x 1E4 | C48.2 | 137.5296833 | 99.63488952 | 91.5923883  | 99.78220204 | 78.31131814 | 60.73988556 | 141.469541  | 144.0531725 | 121.1839548 |
| 1A5 x 1E4 | C49.1 | 147.9555156 | 130.9669089 | 114.1252422 | NA          | NA          | NA          | 155.6216762 | 146.5110324 | 143.8070431 |
| 1A5 x 1E4 | C5.1  | 134.74533   | 91.19825855 | 67.53456722 | 112.1167485 | 67.3717248  | 54.50375333 | 144.5631696 | 109.6402337 | 97.07734103 |
| 1A5 x 1E4 | C5.2  | 122.4868448 | 98.56379539 | 94.16805925 | 108.9229595 | 64.77106176 | 50.61289167 | 128.56437   | 115.9043164 | 81.41373214 |
| 1A5 x 1E4 | C51.1 | 126.8299393 | 80.95133587 | 62.85174085 | 94.018625   | 69.96709889 | 48.91384866 | 134.4387948 | 92.10839897 | 82.27423162 |
| 1A5 x 1E4 | C51.2 | NA          | 129.402     | 90.195      | 125.5095    | 103.489     | 91.9435     | 136.676     | 120.114     | 108.526     |
| 1A5 x 1E4 | C52.1 | 149.9309667 | 139.4417    | 121.3661    | 102.1914667 | 91.1401     | 81.41772083 | 144.6253333 | 151.4207333 | 147.6338333 |
| 1A5 x 1E4 | C53.1 | 144.8260667 | 105.0682333 | 73.24316667 | 132.9782122 | 123.8044111 | 108.7698917 | 149.735875  | 128.65875   | 114.4807833 |
| 1A5 x 1E4 | C54.1 | 135.5046667 | 90.06941667 | 78.36625    | 99.638875   | 62.7065     | 45.8876     | 110.648125  | 92.74       | 81.227      |
| 1A5 x 1E4 | C55.1 | 109.167344  | 107.2654064 | 100.8906894 | 57.26538036 | 61.84735752 | 51.71754559 | 106.18113   | 73.07108507 | 64.8809356  |
| 1A5 x 1E4 | C55.2 | 135.1879165 | 115.0362036 | 107.6181829 | 87.86478712 | 80.1432212  | 62.87777342 | 125.08156   | 91.30203841 | 74.81903333 |
| 1A5 x 1E4 | C56.1 | 145.842725  | 86.43894667 | 65.59886    | 115.9547068 | 109.7606541 | 98.63940602 | 145.4812875 | 114.9390147 | 108.0668241 |
| 1A5 x 1E4 | C56.2 | 122.2490264 | 121.5312937 | 103.0517146 | 77.84124999 | 70.86354445 | 58.7452503  | 99.59983334 | 90.83019429 | 62.575715   |
| 1A5 x 1E4 | C57.1 | 144.5168427 | 91.01843401 | 69.39815666 | 90.03664024 | 81.25058572 | 62.37663338 | 133.6969909 | 114.0097167 | 100.2970748 |
| 1A5 x 1E4 | C57.2 | 139.5225179 | 129.0397701 | 118.6768624 | 136.1172544 | 82.07330555 | 79.93935533 | 147.9636867 | 144.962802  | 110.863324  |
| 1A5 x 1E4 | C59.2 | 138.3616443 | 123.1176089 | 108.8007682 | 112.8022248 | 95.06695825 | 84.43780667 | 152.3203889 | 157.2451458 | 150.3229919 |
| 1A5 x 1E4 | C6.1  | 140.369809  | 76.11906    | 61.99127151 | 85.73941124 | 62.67687485 | 44.5367     | 114.6468019 | 83.5593218  | 72.51994193 |
| 1A5 x 1E4 | C60.1 | 143.2763818 | 133.1723465 | 113.3340635 | 116.2300829 | 91.46114155 | 71.00761305 | 139.8293823 | 130.9212085 | 120.1724615 |
| 1A5 x 1E4 | C60.2 | 133.4199495 | 78.84219596 | 66.76915498 | 98.95501287 | 62.58574033 | 56.96450476 | 110.4542643 | 97.89470158 | 70.73642667 |

|           |          |             |             |             |             |             |             |             |             |             |
|-----------|----------|-------------|-------------|-------------|-------------|-------------|-------------|-------------|-------------|-------------|
| 1A5 x 1E4 | C61.1    | 140.4823907 | 129.3644404 | 123.0604814 | 106.8338879 | 116.219205  | 72.27605    | 123.9249949 | 114.8183606 | 105.1328956 |
| 1A5 x 1E4 | C61.2    | 151.352     | 129.3785    | 119.10325   | NA          | NA          | NA          | NA          | NA          | NA          |
| 1A5 x 1E4 | C62.1    | 136.1648143 | 78.11690191 | 57.21065016 | 112.6051667 | 93.17224262 | 85.99448833 | 134.4011389 | 92.88533651 | 87.48232    |
| 1A5 x 1E4 | C62.2    | 136.1580048 | 125.5261103 | 113.8715245 | 100.5129568 | 58.69548398 | 46.13089015 | 119.7205857 | 105.9849997 | 84.67107476 |
| 1A5 x 1E4 | C63.1    | 142.5026762 | 130.5333909 | 121.1775795 | 91.47786315 | 67.20438607 | 47.365845   | 127.3047442 | 122.857718  | 122.6557621 |
| 1A5 x 1E4 | C7.1     | 141.5204583 | 131.4315708 | 121.2324941 | 107.0507563 | 85.77393214 | 64.21690625 | 133.6570833 | 127.1418    | 75.51886667 |
| 1A5 x 1E4 | C7.2     | 136.0962522 | 92.10649795 | 69.3716777  | 120.2493719 | 116.8331467 | 103.4156257 | 156.0892984 | 141.4524407 | 146.0501393 |
| 1A5 x 1E4 | C8.1     | 129.047     | 146.4905939 | 140.9315711 | 137.959353  | 86.46366084 | 59.71768571 | 119.5967432 | 107.5144365 | 74.37524199 |
| 1A5 x 1E4 | CR4_A1.1 | 139.9556049 | 138.0073314 | 122.8030192 | 120.6225381 | 47.92726329 | 47.05137667 | 115.2707845 | 91.49091524 | 76.67543944 |
| 1A5 x 1E4 | CR4_A2.1 | 144.2044739 | 128.8940845 | 115.4417262 | 122.1748049 | 124.0750834 | 95.23080757 | 119.2809543 | 78.84947969 | 85.91690825 |
| 1A5 x 1E4 | CR4_A2.2 | 132.4851678 | 94.4412177  | 71.75834965 | 114.9885022 | 99.15919555 | 82.27587525 | 140.0621167 | 136.48      | 127.7393418 |
| 1A5 x 1E4 | CR4_A3.1 | 133.4120786 | 92.26691548 | 83.46434429 | 92.48945    | 71.28244444 | 63.00256667 | 117.039125  | 98.18359823 | 76.27530556 |
| 1A5 x 1E4 | CR4_A3.2 | 132.4076667 | 115.7426567 | 93.26704953 | 98.72075    | 67.68665    | 60.30465    | 146.1632333 | 155.88444   | 145.7870667 |
| 1A5 x 1E4 | CR4_A4.1 | 139.0089542 | 130.8030266 | 121.9852163 | 95.89821771 | 69.33165951 | 54.53366667 | 113.5860222 | 101.7604929 | 75.25519253 |
| 1A5 x 1E4 | D1.1     | 128.2198073 | 99.31057183 | 94.87723454 | 68.54464988 | 62.15237103 | 52.74219065 | 110.2411657 | 64.06267241 | 65.10296911 |
| 1A5 x 1E4 | D1.2     | 130.8457906 | 90.43009944 | 72.0139829  | 128.3467526 | 115.8741778 | 103.55543   | 143.0750406 | 151.1918897 | 130.1428483 |
| 1A5 x 1E4 | D1.3     | 136.9333446 | 127.3751092 | 115.4084881 | 68.09081038 | 64.30700227 | 57.02493827 | 127.8084872 | 103.2388425 | 85.59412857 |
| 1A5 x 1E4 | D10.1    | 137.13191   | 97.16337923 | 98.19009126 | 93.13030816 | 55.46310278 | 47.96614167 | 125.5779811 | 81.95287525 | 81.72203053 |
| 1A5 x 1E4 | D11.1    | 137.4227722 | 128.4090567 | 116.0124194 | 104.4621952 | 85.031795   | 64.62406    | 152.0947143 | 148.1162556 | 140.3647691 |
| 1A5 x 1E4 | D2.1     | 147.0093667 | 111.6559    | 91.41493636 | 105.253095  | 97.73143112 | 73.492095   | 109.4359262 | 110.30165   | 93.83195279 |
| 1A5 x 1E4 | D3.1     | 140.3704502 | 120.6201148 | 105.9397132 | 102.1309036 | 66.12438462 | 55.45510715 | 137.2680826 | 108.4175022 | 94.5778123  |
| 1A5 x 1E4 | D3.2     | 127.2232359 | 123.9091457 | 109.0111575 | 106.4264574 | 87.55285172 | 76.70290848 | 144.8806259 | 126.8359511 | 103.25651   |
| 1A5 x 1E4 | D4.1     | 142.9247362 | 99.85726419 | 98.16665112 | 86.86838947 | 77.3569095  | 51.355195   | 126.8347138 | 112.9523967 | 86.03669192 |
| 1A5 x 1E4 | D5.1     | 139.6082102 | 123.9581736 | 101.9029697 | 129.9543736 | 120.8089585 | 91.11336095 | 155.3814996 | 158.4681185 | 155.3631985 |
| 1A5 x 1E4 | D7.1     | 141.4650625 | 90.737      | 68.1256     | 99.07035    | 72.71023833 | 55.702675   | 146.61775   | 145.754375  | 131.328     |

|           |      |             |             |             |             |             |             |             |             |             |
|-----------|------|-------------|-------------|-------------|-------------|-------------|-------------|-------------|-------------|-------------|
| 1A5 x 1E4 | D7.2 | 142.8895    | 139.5806627 | 130.2345897 | 132.3254059 | 77.77676049 | 49.79751746 | 117.9996648 | 110.61985   | 64.02539464 |
| 1A5 x 1E4 | D7.3 | 131.353625  | 117.7358583 | 118.582375  | 80.81006667 | 79.23994167 | 58.67323333 | 131.358     | 145.0743333 | 134.449     |
| 1A5 x 1E4 | D9.1 | 141.3127633 | 102.2868183 | 75.38129524 | 155.4523    | 146.25109   | 131.66258   | 162.43075   | 164.8569633 | 155.3209733 |
| 1A5 x 1E4 | D9.2 | 138.49125   | 99.77906587 | 100.5998273 | 95.95926784 | 86.737175   | 71.68969167 | 139.1101325 | 141.2166408 | 112.2440933 |

---

**Table S5 Orthologs in *Z. tritici* to genes involved in melanin biosynthesis**

| Protein ID | Name <sup>a</sup>           | Chromosome | Start (bp) | Stop (bp) | Melanin pathway function                                | Melanin pathway | Mutant effect         | Tested in <i>Z. tritici</i> | Highest RPKM mean <sup>b</sup> | RPKM Stdv | Reference <sup>c</sup>                                                                                                               |
|------------|-----------------------------|------------|------------|-----------|---------------------------------------------------------|-----------------|-----------------------|-----------------------------|--------------------------------|-----------|--------------------------------------------------------------------------------------------------------------------------------------|
| 96592      | <i>PKS1</i> <sup>1)</sup>   | 11         | 586456     | 593034    | Polyketide synthase encoding gene                       | DHN             | Full loss of function | No                          | 7.8 (8wpi) *                   | 0.6       | (TAKANO <i>et al.</i> 1995; BUTLER and DAY 1998; LANGFELDER <i>et al.</i> 2003 <sup>2)</sup> ; HU <i>et al.</i> 2012 <sup>1)</sup> ) |
| 68710      | <i>THR2</i> <sup>2)</sup>   | 2          | 2514972    | 2515981   | 1;3;6;8-tetrahydroxynaphthalene reductase encoding gene | DHN             | Full loss of function | No                          | 132.5 (13dpi)                  | 41.8      | (BUTLER and DAY 1998; LANGFELDER <i>et al.</i> 2003 <sup>2)</sup> ; IPCHO <i>et al.</i> 2012)                                        |
| 18775      | <i>MgSCY1</i> <sup>1)</sup> | 1          | 963695     | 964159    | Syctalone dehydratase encoding gene                     | DHN             | Full loss of function | No                          | 133.1 (8wpi)                   | 15        | (BUTLER and DAY 1998; LANGFELDER <i>et al.</i> 2003 <sup>2)</sup> ; IPCHO <i>et al.</i> 2012)                                        |
| 90337      | <i>SCY2</i> <sup>3)</sup>   | 2          | 133146     | 133741    | Syctalone dehydratase encoding gene                     | DHN             | Full loss of function | No                          | 13.6 (7dpi) *                  | 9.4       | (BUTLER and DAY 1998; LANGFELDER <i>et al.</i> 2003 <sup>2)</sup> ; IPCHO <i>et al.</i> 2012)                                        |
| 87994      | <i>THR1</i> <sup>4)</sup>   | 11         | 604612     | 605471    | 1;3;8-tetrahydroxynaphthalene reductase encoding gene   | DHN             | Full loss of function | No                          | 231.2 (8wpi) *                 | 43.3      | (BUTLER and DAY 1998; LANGFELDER <i>et al.</i> 2003 <sup>2)</sup> ; IPCHO <i>et al.</i> 2012)                                        |
| 35451      | <i>LAC1</i> <sup>5)</sup>   | 2          | 140750     | 142914    | Laccase encoding gene                                   | DHN/DOPA ?      | Reduced               | No                          | 24.3 (7dpi) *                  | 12.4      | (LIN <i>et al.</i> 2012; UPADHYAY <i>et al.</i> 2013)                                                                                |
| 36350      | <i>LAC2</i> <sup>5)</sup>   | 2          | 144093     | 146209    | Laccase encoding gene                                   | DHN/DOPA ?      | Reduced               | No                          | 40.8 (7dpi) *                  | 24.2      | (LIN <i>et al.</i> 2012; UPADHYAY <i>et al.</i> 2013)                                                                                |
| 42222      | <i>LAC3</i> <sup>5)</sup>   | 5          | 2279071    | 2281252   | Laccase encoding gene                                   | DHN/DOPA ?      | Reduced               | No                          | 38.0 (7dpi) *                  | 22        | (LIN <i>et al.</i> 2012; UPADHYAY <i>et al.</i> 2013)                                                                                |

|        |                             |    |         |         |                                                |                |                       |     |                 |      |                                                          |
|--------|-----------------------------|----|---------|---------|------------------------------------------------|----------------|-----------------------|-----|-----------------|------|----------------------------------------------------------|
| 42793  | <i>LAC4</i> <sup>5)</sup>   | 5  | 2282533 | 2284432 | Laccase encoding gene                          | DHN/<br>DOPA ? | Reduced               | No  | 32.6 (7dpi)     | 20.8 | (LIN <i>et al.</i> 2012; UPADHYAY <i>et al.</i> 2013)    |
| 32322  | <i>LAC5</i> <sup>5)</sup>   | 1  | 5292579 | 5294444 | Laccase encoding gene                          | DHN/<br>DOPA ? | Reduced               | No  | 56.7 (7dpi) *   | 37.8 | (LIN <i>et al.</i> 2012; UPADHYAY <i>et al.</i> 2013)    |
| 108040 | <i>LAC6</i> <sup>5)</sup>   | 2  | 1650426 | 1652574 | Laccase encoding gene                          | DHN/<br>DOPA ? | Reduced               | No  | 193.8 (7dpi) *  | 49.5 | (LIN <i>et al.</i> 2012; UPADHYAY <i>et al.</i> 2013)    |
| 38161  | <i>LAC7</i> <sup>5)</sup>   | 3  | 2746686 | 2748706 | Laccase encoding gene                          | DHN/<br>DOPA ? | Reduced               | No  | 7.9 (8wpi)      | 0.6  | (LIN <i>et al.</i> 2012; UPADHYAY <i>et al.</i> 2013)    |
| 109666 | <i>LAC8</i> <sup>5)</sup>   | 5  | 2492745 | 2495149 | Laccase encoding gene                          | DHN/<br>DOPA ? | Reduced               | No  | 451.7 (8wpi) *  | 74.3 | (LIN <i>et al.</i> 2012; UPADHYAY <i>et al.</i> 2013)    |
| 52873  | <i>MgGpa1</i> <sup>1)</sup> | 1  | 2514902 | 2516229 | G alpha protein encoding gene                  | ?              | Hampered              | Yes | 132.5 (13dpi)   | 17.6 | (SOLOMON <i>et al.</i> 2004; MEHRABI <i>et al.</i> 2009) |
| 68892  | <i>MgGpb1</i> <sup>1)</sup> | 2  | 2862220 | 2863783 | G beta protein encoding gene                   | ?              | Hampered              | Yes | 118.2 (13dpi) * | 7.3  | (MEHRABI <i>et al.</i> 2009)                             |
| 76503  | <i>MgGpa3</i> <sup>1)</sup> | 10 | 1111808 | 1113544 | G alpha protein encoding gene                  | ?              | Reduced               | Yes | 33.9 (13dpi)    | 4.9  | (MEHRABI <i>et al.</i> 2009)                             |
| 76502  | <i>MgHog1</i> <sup>1)</sup> | 10 | 1108132 | 1110166 | Mitogen-activated protein kinase encoding gene | ?              | Full loss of function | Yes | 228.6 (7dpi)    | 64.8 | (MEHRABI <i>et al.</i> 2006b)                            |
| 102121 | <i>MgSlt2</i> <sup>1)</sup> | 1  | 1331331 | 1332992 | Mitogen-activated protein kinase encoding gene | ?              | Full loss of function | Yes | 205.4 (13dpi) * | 14.8 | (MEHRABI <i>et al.</i> 2006a)                            |
| 73071  | <i>MgFus3</i> <sup>1)</sup> | 6  | 1182095 | 1184167 | Mitogen-activated protein kinase encoding gene | ?              | Full loss of function | Yes | 163.1 (13dpi) * | 3.9  | (COUSIN <i>et al.</i> 2006)                              |
| 37276  | <i>MVE1</i> <sup>1)</sup>   | 2  | 2995014 | 2995823 | Velvet gene                                    | ?              | Full loss of function | Yes | 123.8 (7dpi)    | 38.1 | (CHOI and GOODWIN 2011b)                                 |
| 47503  | <i>MCC1</i> <sup>1)</sup>   | 9  | 1594202 | 1595191 | C-type cyclin                                  | ?              | Increased             | Yes | 35.5 (13dpi)    | 7    | (CHOI and GOODWIN 2011a)                                 |



| encoding gene |                            |    |         |         |                                            |       |                       |    |                |      |                                                                                                                                                                                                                                                |
|---------------|----------------------------|----|---------|---------|--------------------------------------------|-------|-----------------------|----|----------------|------|------------------------------------------------------------------------------------------------------------------------------------------------------------------------------------------------------------------------------------------------|
| 96591         | <i>PRF1</i> <sup>5)</sup>  | 11 | 584834  | 585795  | Prefoldin chaperone encoding gene          | DHN ? | ?                     | No | 91.4 (8wpi)    | 11   | No Reference, but this is a gene just downstream from 96592 ( <i>PKS1</i> ), thus in the region of the expected DHN melanin pathway cluster. It shows conservation over other fungi and thus is believed to belong to the DHN melanin pathway. |
| 87993         | <i>CMR1</i> <sup>4)</sup>  | 11 | 600309  | 603354  | Transcription factor encoding gene         | DHN ? | Full loss of function | No | 12.7 (8wpi) *  | 1.6  | (ELIAHU <i>et al.</i> 2007)                                                                                                                                                                                                                    |
| 99683         | <i>AYG1</i> <sup>6)</sup>  | 3  | 2737599 | 2739046 | Unknown                                    | DHN   | Reduced               | No | 34.0 (8wpi) *  | 3.4  | (TSAI <i>et al.</i> 1999 <sup>3)</sup> )                                                                                                                                                                                                       |
| 100584        | <i>AYG2</i> <sup>7)</sup>  | 6  | 2057066 | 2058412 | Unknown                                    | DHN   | Reduced               | No | 15.7 (13dpi) * | 0.4  | (TSAI <i>et al.</i> 1999 <sup>3)</sup> )                                                                                                                                                                                                       |
| 72443         | <i>PEX13</i> <sup>8)</sup> | 5  | 1942248 | 1943680 | Peroxisome biogenesis factor encoding gene | ?     | Full loss of function | No | 101.9 (7dpi) * | 40.6 | (FUJIHARA <i>et al.</i> 2010)                                                                                                                                                                                                                  |
| 98537         | <i>PEX6</i> <sup>4)</sup>  | 1  | 3057033 | 3061525 | Peroxisome assembly factor encoding gene   | ?     | Reduced               | No | 21.1 (13dpi)   | 2.2  | (KIMURA <i>et al.</i> 2001)                                                                                                                                                                                                                    |
| 65403         | <i>CLAP1</i> <sup>9)</sup> | 1  | 1543207 | 1547078 | Copper-transporting ATPase encoding gene   | ?     | Reduced               | No | 41.4 (7dpi)    | 12.5 | (PARISOT <i>et al.</i> 2002)                                                                                                                                                                                                                   |
| 57911         | <i>MAC1</i> <sup>10)</sup> | 4  | 1213598 | 1215218 | Transcription factor encoding gene         | ?     | Reduced               | No | 201.6 (7dpi) * | 48.5 | (LIN <i>et al.</i> 2006)                                                                                                                                                                                                                       |

<sup>a</sup> 1) Name as found in the reference literature or on the joint genome institute (JGI) website for *Z. tritici* (<http://genomeportal.jgi-psf.org/Mycgr3/Mycgr3.home.html>). 2) Name given by us. Similar name given as found in ortholog of *Colletotrichum lagenarium*. 3) Two syctalone dehydratases (Protein ID: 18775 / 90337) were found when blasting the *SNOG\_11564.3* (Ipcho *et al.* 2012) gene against *Z. tritici*. As 18775 had the name '*MgSCY1*' (JGI), we gave 90337 the name '*SCY2*'. 4) Same name given as found in ortholog of *Colletotrichum lagenarium*. 5) Name given by us by abbreviating the enzyme encoded by the gene. 6) Same name

given as found in ortholog of *Aspergillus fumigatus*. <sup>7)</sup> Name given by us. Similar name given as found in ortholog of *Aspergillus fumigatus*. <sup>8)</sup> Same name given as found in ortholog of *Colletotrichum orbiculare*. <sup>9)</sup> Same name given as found in ortholog of *Colletotrichum lindemuthianum*. <sup>10)</sup> Same name given as found in ortholog of *Cryptococcus neoformans*.

<sup>b</sup> We had chosen a RPKM value of 2 as an expression threshold. All the genes associated with melanization showed  $\geq 2$  RPKM values. Hence all of the orthologs could affect melanization in *Z. tritici*. \* Indicates significant changes in transcript abundances over time.

<sup>c</sup> <sup>1)</sup> Hu, Y., X. Hao, J. Lou, P. Zhang, J. Pan et al., 2012 A PKS gene, pks-1, is involved in chaetoglobosin biosynthesis, pigmentation and sporulation in *Chaetomium globosum*. Science China-Life Sciences 55: 1100–1108.

<sup>2)</sup> Langfelder, K., M. Streibel, B. Jahn, G. Haase, and A. A. Brakhage, 2003 Biosynthesis of fungal melanins and their importance for human 11 pathogenic fungi. Fungal Genet. Biol. 38: 143–158.

<sup>3)</sup> Tsai, H. F., M. H. Wheeler, Y. C. Chang, and K. J. Kwon-Chung, 1999 A developmentally regulated gene cluster involved in conidial pigment biosynthesis in *Aspergillus fumigatus*. J. Bacteriol. 181: 6469–6477.

**Table S6 Summary of QTL positions and effects for cross 3D1 x 3D7.**

| Environment | Colony age (dpi) | QTL peak marker <sup>a</sup> | Chromosome | Estimated position of peaking marker (cM) | Estimated position of peaking marker (kb) | LOD score at peak | P-value | Mean 1A5 allele (grey values) | Mean 1E4 allele (grey values) | Mean difference | Allele effect <sup>b</sup> | Percentage of variance explained by QTL (%) | Estimated position of proximal marker (kb) <sup>c</sup> | Estimated position of distal marker (kb) <sup>c</sup> | Bayes confidence interval length (kb) |
|-------------|------------------|------------------------------|------------|-------------------------------------------|-------------------------------------------|-------------------|---------|-------------------------------|-------------------------------|-----------------|----------------------------|---------------------------------------------|---------------------------------------------------------|-------------------------------------------------------|---------------------------------------|
| Cold        | 8                | c10.loc107 (p)               | 10         | 107.13                                    | 646                                       | 8.29              | < 0.001 | 135.78                        | 129.09                        | 6.69            | 3D1                        | 13.6                                        | 634                                                     | 673                                                   | 39                                    |
| Cold        | 8                | 12_143193                    | 12         | 5.74                                      | 143                                       | 4.85              | 0.002   | 134.56                        | 129.28                        | 5.27            | 3D1                        | 9.2                                         | 29                                                      | 305                                                   | 276                                   |
| Cold        | 11               | 8_1250811                    | 8          | 140.32                                    | 1251                                      | 4.07              | 0.01    | 101.72                        | 112.39                        | 10.66           | 3D7                        | 7.1                                         | 897                                                     | 2228                                                  | 1332                                  |
| Cold        | 11               | c10.loc108 (p)               | 10         | 108.13                                    | 649                                       | 9.55              | < 0.001 | 116.28                        | 100.17                        | 16.11           | 3D1                        | 15.6                                        | 634                                                     | 673                                                   | 39                                    |
| Cold        | 11               | 11_535446                    | 11         | 77.83                                     | 535                                       | 4.32              | 0.006   | 113.31                        | 102.18                        | 11.13           | 3D1                        | 7.4                                         | 447                                                     | 1332                                                  | 885                                   |
| Control     | 8                | c11.loc82 (p)                | 11         | 82.06                                     | 581                                       | 32.2              | < 0.001 | 118                           | 93.73                         | 24.27           | 3D1                        | 39.2                                        | 560                                                     | 603                                                   | 43                                    |
| Control     | 11               | 5_871061                     | 5          | 157.26                                    | 871                                       | 4.38              | 0.003   | 74.99                         | 85.47                         | 10.48           | 3D7                        | 7.5                                         | 449                                                     | 2799                                                  | 2350                                  |
| Control     | 11               | c11.loc81 (p)                | 11         | 81.06                                     | 571                                       | 30.79             | < 0.001 | 93.62                         | 69.23                         | 24.4            | 3D1                        | 38.2                                        | 549                                                     | 603                                                   | 54                                    |
| Control     | 14               | 5_958098                     | 5          | 160.33                                    | 958                                       | 3.78              | 0.016   | 61.52                         | 69.96                         | 8.43            | 3D7                        | 6.5                                         | 449                                                     | 2799                                                  | 2350                                  |
| Control     | 14               | c11.loc80 (p)                | 11         | 80.06                                     | 560                                       | 21.17             | < 0.001 | 75.79                         | 57.28                         | 18.51           | 3D1                        | 30                                          | 512                                                     | 603                                                   | 91                                    |
| Fungicide   | 8                | c11.loc81 (p)                | 11         | 81.06                                     | 571                                       | 34                | < 0.001 | 124.55                        | 100.17                        | 24.38           | 3D1                        | 45.8                                        | 549                                                     | 592                                                   | 43                                    |
| Fungicide   | 11               | c11.loc82 (p)                | 11         | 82.06                                     | 581                                       | 23.8              | < 0.001 | 96.79                         | 75.05                         | 21.74           | 3D1                        | 30.4                                        | 549                                                     | 625                                                   | 76                                    |
| Fungicide   | 14               | 1_1740191                    | 1          | 193.5                                     | 1740                                      | 3.64              | 0.014   | 64.87                         | 73.03                         | 8.16            | 3D7                        | 6.3                                         | 1063                                                    | 4267                                                  | 3203                                  |
| Fungicide   | 14               | c11.loc81 (p)                | 11         | 81.06                                     | 571                                       | 19.34             | < 0.001 | 78.24                         | 60.96                         | 17.28           | 3D1                        | 27.2                                        | 535                                                     | 614                                                   | 79                                    |

<sup>a</sup> A (p) indicates that a pseudomarker provided the highest LOD score. In all other cases a true marker provided the highest LOD score.

<sup>b</sup> 3D7 indicates that the parental 3D7 allele provided the higher phenotypic mean than the parental 3D1 allele, while 3D1 indicates that the parental 3D1 allele provided the higher phenotypic mean than the parental 3D7 allele.

<sup>c</sup> Markers flanking Bayes confidence interval.

**Table S7 Summary of QTL positions and effects for cross 1A5 x 1E4.**

| Environment | Colony age (dpi) | QTL peak marker <sup>a</sup> | Chromosome | Estimated position of peaking marker (cM) | Estimated position of peaking marker (kb) | LOD score at peak | P-value | Mean 1A5 allele (grey values) | Mean 1E4 allele (grey values) | Mean difference | Allele effect <sup>b</sup> | Percentage of variance explained by QTL (%) | Estimated position of proximal marker (kb) <sup>c</sup> | Estimated position of distal marker (kb) <sup>c</sup> | Bayes confidence interval length (kb) |
|-------------|------------------|------------------------------|------------|-------------------------------------------|-------------------------------------------|-------------------|---------|-------------------------------|-------------------------------|-----------------|----------------------------|---------------------------------------------|---------------------------------------------------------|-------------------------------------------------------|---------------------------------------|
| Cold        | 8                | 1_2840762                    | 1          | 445.26                                    | 2841                                      | 3.6               | 0.029   | 134.52                        | 138.11                        | 3.58            | 1E4                        | 6.3                                         | 2604                                                    | 3275                                                  | 671                                   |
| Cold        | 8                | c2.loc226 (p)                | 2          | 226.07                                    | 1699                                      | 10                | < 0.001 | 139.11                        | 133.43                        | 5.69            | 1A5                        | 17                                          | 1646                                                    | 1819                                                  | 173                                   |
| Cold        | 8                | c3.loc208 (p)                | 3          | 208.04                                    | 1301                                      | 8.52              | < 0.001 | 133.71                        | 138.79                        | 5.08            | 1E4                        | 12.1                                        | 869                                                     | 1749                                                  | 880                                   |
| Cold        | 11               | 1_1553785                    | 1          | 219.31                                    | 1554                                      | 8.59              | < 0.001 | 103.25                        | 117.72                        | 14.47           | 1E4                        | 14.3                                        | 1020                                                    | 1627                                                  | 607                                   |
| Cold        | 11               | 2_1814469                    | 2          | 243.95                                    | 1814                                      | 3.68              | 0.018   | 114.88                        | 105.17                        | 9.71            | 1A5                        | 6.4                                         | 1428                                                    | 2270                                                  | 842                                   |
| Cold        | 11               | 5_1699464                    | 5          | 224.63                                    | 1699                                      | 5.9               | < 0.001 | 116.26                        | 104.11                        | 12.15           | 1A5                        | 10.1                                        | 773                                                     | 1911                                                  | 1138                                  |
| Cold        | 11               | 8_429575                     | 8          | 58.42                                     | 430                                       | 7.65              | < 0.001 | 117.28                        | 103.6                         | 13.68           | 1A5                        | 12.8                                        | 348                                                     | 446                                                   | 99                                    |
| Cold        | 14               | 1_1028414                    | 1          | 157.63                                    | 1028                                      | 7.65              | < 0.001 | 91.91                         | 105.6                         | 13.69           | 1E4                        | 13                                          | 1014                                                    | 1589                                                  | 575                                   |
| Cold        | 14               | c3.loc249 (p)                | 3          | 249.04                                    | 1780                                      | 3.44              | 0.046   | 103.29                        | 94.17                         | 9.12            | 1A5                        | 5.7                                         | 1621                                                    | 1968                                                  | 347                                   |
| Cold        | 14               | 5_1593047                    | 5          | 215.71                                    | 1593                                      | 5.13              | < 0.001 | 104.07                        | 92.71                         | 11.36           | 1A5                        | 8.9                                         | 1230                                                    | 1913                                                  | 683                                   |
| Cold        | 14               | 7_841106                     | 7          | 181.47                                    | 841                                       | 4.01              | 0.014   | 103.42                        | 93.3                          | 10.13           | 1A5                        | 7                                           | 428                                                     | 1893                                                  | 1464                                  |
| Cold        | 14               | 8_397588                     | 8          | 55.79                                     | 398                                       | 6.62              | < 0.001 | 105.18                        | 92.37                         | 12.81           | 1A5                        | 11.3                                        | 348                                                     | 446                                                   | 99                                    |
| Control     | 8                | c1.loc106 (p)                | 1          | 106.14                                    | 771                                       | 3.4               | 0.037   | 106.6                         | 97.98                         | 8.62            | 1A5                        | 5.8                                         | 441                                                     | 5371                                                  | 4930                                  |
| Control     | 8                | 2_1526778                    | 2          | 205.66                                    | 1527                                      | 7.34              | < 0.001 | 108.31                        | 95.86                         | 12.45           | 1A5                        | 12.3                                        | 1455                                                    | 1646                                                  | 191                                   |
| Control     | 11               | 1_3069693                    | 1          | 492.19                                    | 3070                                      | 6.24              | < 0.001 | 76.24                         | 88.1                          | 11.86           | 1E4                        | 10.9                                        | 2919                                                    | 3249                                                  | 331                                   |
| Control     | 14               | 1_3006378                    | 1          | 480.86                                    | 3006                                      | 5.32              | < 0.001 | 61.69                         | 72.61                         | 10.92           | 1E4                        | 9.2                                         | 2854                                                    | 5652                                                  | 2798                                  |
| Control     | 14               | 3_1739730                    | 3          | 245.64                                    | 1740                                      | 4.29              | 0.005   | 62.41                         | 72.25                         | 9.84            | 1E4                        | 7.5                                         | 1494                                                    | 1968                                                  | 474                                   |
| Control     | 14               | 4_421356                     | 4          | 55.21                                     | 421                                       | 5.61              | < 0.001 | 61.71                         | 72.91                         | 11.2            | 1E4                        | 9.5                                         | 161                                                     | 476                                                   | 315                                   |
| Control     | 14               | 5_1919504                    | 5          | 249.23                                    | 1920                                      | 4.64              | 0.001   | 62.31                         | 72.55                         | 10.24           | 1E4                        | 8                                           | 1385                                                    | 2105                                                  | 721                                   |

|           |    |               |    |        |      |      |         |        |        |       |     |      |      |      |      |
|-----------|----|---------------|----|--------|------|------|---------|--------|--------|-------|-----|------|------|------|------|
| Control   | 14 | 11_523597     | 11 | 66.72  | 524  | 4.71 | < 0.001 | 72.97  | 62.64  | 10.33 | 1A5 | 8.2  | 329  | 581  | 252  |
| Fungicide | 8  | 2_1470426     | 2  | 201.05 | 1470 | 7.55 | < 0.001 | 140.56 | 127.73 | 12.83 | 1A5 | 12.9 | 1464 | 1814 | 350  |
| Fungicide | 8  | c4.loc245 (p) | 4  | 245.04 | 1471 | 7.17 | < 0.001 | 127.64 | 140.17 | 12.53 | 1E4 | 12.3 | 415  | 1802 | 1386 |
| Fungicide | 11 | 1_3249298     | 1  | 511.19 | 3249 | 6.55 | < 0.001 | 108.84 | 124.9  | 16.05 | 1E4 | 11.2 | 2974 | 3275 | 301  |
| Fungicide | 11 | 2_1632971     | 2  | 211.37 | 1633 | 4.01 | 0.011   | 123.66 | 111.06 | 12.6  | 1A5 | 7    | 1428 | 2375 | 947  |
| Fungicide | 11 | 3_1371178     | 3  | 221.45 | 1371 | 4.34 | 0.007   | 111.23 | 124.29 | 13.06 | 1E4 | 7.6  | 1308 | 2180 | 872  |
| Fungicide | 11 | c4.loc52 (p)  | 4  | 52.04  | 418  | 9.15 | < 0.001 | 108.37 | 126.55 | 18.18 | 1E4 | 14.8 | 415  | 1094 | 679  |
| Fungicide | 14 | 1_3249289     | 1  | 511.19 | 3249 | 6.24 | < 0.001 | 93.34  | 109.6  | 16.26 | 1E4 | 10.7 | 2840 | 5735 | 2894 |
| Fungicide | 14 | 2_1632971     | 2  | 211.37 | 1633 | 4.14 | 0.01    | 108.58 | 95.31  | 13.27 | 1A5 | 7.2  | 1428 | 2084 | 657  |
| Fungicide | 14 | 3_1739730     | 3  | 245.64 | 1740 | 4.22 | 0.01    | 95.5   | 108.91 | 13.41 | 1E4 | 7.4  | 1315 | 2206 | 891  |
| Fungicide | 14 | c4.loc54 (p)  | 4  | 54.04  | 420  | 9.47 | < 0.001 | 92.37  | 111.73 | 19.36 | 1E4 | 16.2 | 417  | 426  | 9    |
| Fungicide | 14 | 6_2299166     | 6  | 289.62 | 2299 | 3.56 | 0.027   | 108.33 | 96     | 12.33 | 1A5 | 6.2  | 1166 | 2438 | 1272 |
| Fungicide | 14 | c11.loc70 (p) | 11 | 70.07  | 533  | 4.48 | 0.007   | 109.68 | 96.1   | 13.58 | 1A5 | 7.8  | 271  | 1160 | 889  |

<sup>a</sup> A (p) indicates that a pseudomarker provided the highest LOD score. In all other cases a true marker provided the highest LOD score.

<sup>b</sup> 1E4 indicates that the parental 1E4 allele provided the higher phenotypic mean than the parental 1A5 allele, while 1A5 indicates that the parental 1A5 allele provided the higher phenotypic mean than the parental 1E4 allele.

<sup>c</sup> Markers flanking Bayes confidence interval.

**Table S8 Summary of genes affected by sequence variation within each Bayes confidence interval for cross 3D1 x 3D7, excluding all genes containing no sequence variation or with synonymous SNPs only.**

| Environment | Colony age (dpi) | Chromosome | Estimated position of peaking marker (kb) | LOD score at peak | P-value | Estimated position of proximal marker (kb) <sup>a</sup> | Estimated position of distal marker flanking (kb) <sup>a</sup> | Bayes confidence interval length (kb) | Number of sequence variations <sup>b</sup> | Number of genes <sup>b</sup> | Number of genes affected by sequence variations <sup>b</sup> | Percentage of total genes affected by sequence variations (%) <sup>b</sup> | Number of sequence variation affected genes with unknown function <sup>b</sup> | Percentage of total sequence variation affected genes with unknown function (%) <sup>b</sup> | Number of sequence variation affected genes with significant changes in transcript abundances <sup>b</sup> | Percentage of total sequence variation affected genes with significant changes in transcript abundances (%) <sup>b</sup> |
|-------------|------------------|------------|-------------------------------------------|-------------------|---------|---------------------------------------------------------|----------------------------------------------------------------|---------------------------------------|--------------------------------------------|------------------------------|--------------------------------------------------------------|----------------------------------------------------------------------------|--------------------------------------------------------------------------------|----------------------------------------------------------------------------------------------|------------------------------------------------------------------------------------------------------------|--------------------------------------------------------------------------------------------------------------------------|
| Fungicide   | 14               | 1          | 1740                                      | 3.64              | 0.014   | 1063                                                    | 4267                                                           | 3203                                  | 4342                                       | 1130                         | 858                                                          | 76                                                                         | 296                                                                            | 34                                                                                           | 349                                                                                                        | 41                                                                                                                       |
| Control     | 11               | 5          | 871                                       | 4.38              | 0.003   | 449                                                     | 2799                                                           | 2350                                  | 2551                                       | 679                          | 504                                                          | 74                                                                         | 170                                                                            | 34                                                                                           | 220                                                                                                        | 44                                                                                                                       |
| Control     | 14               | 5          | 958                                       | 3.78              | 0.016   | 449                                                     | 2799                                                           | 2350                                  | 2550                                       | 679                          | 504                                                          | 74                                                                         | 170                                                                            | 34                                                                                           | 220                                                                                                        | 44                                                                                                                       |
| Cold        | 11               | 8          | 1251                                      | 4.07              | 0.01    | 897                                                     | 2228                                                           | 1332                                  | 1661                                       | 433                          | 304                                                          | 70                                                                         | 112                                                                            | 37                                                                                           | 114                                                                                                        | 38                                                                                                                       |
| Cold        | 8                | 10         | 646                                       | 8.29              | < 0.001 | 634                                                     | 673                                                            | 39                                    | 59                                         | 15                           | 12                                                           | 80                                                                         | 2                                                                              | 17                                                                                           | 7                                                                                                          | 58                                                                                                                       |
| Cold        | 11               | 10         | 649                                       | 9.55              | < 0.001 | 634                                                     | 673                                                            | 39                                    | 59                                         | 15                           | 12                                                           | 80                                                                         | 2                                                                              | 17                                                                                           | 7                                                                                                          | 58                                                                                                                       |
| Control     | 8                | 11         | 581                                       | 32.2              | < 0.001 | 560                                                     | 603                                                            | 43                                    | 8                                          | 14                           | 4                                                            | 29                                                                         | 0                                                                              | 0                                                                                            | 1                                                                                                          | 25                                                                                                                       |
| Control     | 11               | 11         | 571                                       | 30.79             | < 0.001 | 549                                                     | 603                                                            | 54                                    | 13                                         | 16                           | 6                                                            | 38                                                                         | 1                                                                              | 17                                                                                           | 3                                                                                                          | 50                                                                                                                       |
| Fungicide   | 8                | 11         | 571                                       | 34                | < 0.001 | 549                                                     | 592                                                            | 43                                    | 12                                         | 14                           | 6                                                            | 43                                                                         | 1                                                                              | 17                                                                                           | 3                                                                                                          | 50                                                                                                                       |
| Fungicide   | 11               | 11         | 581                                       | 23.8              | < 0.001 | 549                                                     | 625                                                            | 76                                    | 28                                         | 24                           | 12                                                           | 50                                                                         | 4                                                                              | 33                                                                                           | 5                                                                                                          | 42                                                                                                                       |
| Fungicide   | 14               | 11         | 571                                       | 19.34             | < 0.001 | 535                                                     | 614                                                            | 79                                    | 50                                         | 26                           | 13                                                           | 50                                                                         | 5                                                                              | 38                                                                                           | 6                                                                                                          | 46                                                                                                                       |
| Control     | 14               | 11         | 560                                       | 21.17             | < 0.001 | 512                                                     | 603                                                            | 91                                    | 67                                         | 29                           | 16                                                           | 55                                                                         | 5                                                                              | 31                                                                                           | 6                                                                                                          | 38                                                                                                                       |
| Cold        | 11               | 11         | 535                                       | 4.32              | 0.006   | 447                                                     | 1332                                                           | 885                                   | 1025                                       | 277                          | 190                                                          | 69                                                                         | 78                                                                             | 41                                                                                           | 86                                                                                                         | 45                                                                                                                       |
| Cold        | 8                | 12         | 143                                       | 4.85              | 0.002   | 29                                                      | 305                                                            | 276                                   | 441                                        | 78                           | 56                                                           | 72                                                                         | 22                                                                             | 39                                                                                           | 23                                                                                                         | 41                                                                                                                       |

<sup>a</sup> Markers flanking Bayes confidence interval.

<sup>b</sup> Numbers refer to within Bayes confidence interval.

**Table S9 Summary of genes affected by sequence variation within each Bayes confidence interval for cross 1A5 x 1E4 excluding all genes containing no sequence variation or with synonymous SNPs only.**

| Environment | Colony age (dpi) | Chromosome | Estimated position of peaking marker (kb) | LOD score at peak | P-value | Estimated position of proximal marker (kb) <sup>a</sup> | Estimated position of distal marker flanking (kb) <sup>a</sup> | Bayes confidence interval length (kb) | Number of sequence variations <sup>b</sup> | Number of genes <sup>b</sup> | Number of genes affected by sequence variations <sup>b</sup> | Percentage of total genes affected by sequence variations (%) <sup>b</sup> | Number of sequence variation affected genes with unknown function <sup>b</sup> | Percentage of total sequence variation affected genes with unknown function (%) <sup>b</sup> | Number of sequence variation affected genes with significant changes in transcript abundances <sup>b</sup> | Percentage of total sequence variation affected genes with significant changes in transcript abundances (%) <sup>b</sup> |
|-------------|------------------|------------|-------------------------------------------|-------------------|---------|---------------------------------------------------------|----------------------------------------------------------------|---------------------------------------|--------------------------------------------|------------------------------|--------------------------------------------------------------|----------------------------------------------------------------------------|--------------------------------------------------------------------------------|----------------------------------------------------------------------------------------------|------------------------------------------------------------------------------------------------------------|--------------------------------------------------------------------------------------------------------------------------|
| Fungicide   | 11               | 1          | 3249                                      | 6.55              | < 0.001 | 2974                                                    | 3275                                                           | 301                                   | 677                                        | 113                          | 84                                                           | 74                                                                         | 25                                                                             | 30                                                                                           | 30                                                                                                         | 36                                                                                                                       |
| Control     | 11               | 1          | 3070                                      | 6.24              | < 0.001 | 2919                                                    | 3249                                                           | 331                                   | 725                                        | 121                          | 90                                                           | 74                                                                         | 27                                                                             | 30                                                                                           | 33                                                                                                         | 37                                                                                                                       |
| Cold        | 14               | 1          | 1028                                      | 7.65              | < 0.001 | 1014                                                    | 1589                                                           | 575                                   | 784                                        | 182                          | 145                                                          | 80                                                                         | 49                                                                             | 34                                                                                           | 72                                                                                                         | 50                                                                                                                       |
| Cold        | 11               | 1          | 1554                                      | 8.59              | < 0.001 | 1020                                                    | 1627                                                           | 607                                   | 853                                        | 195                          | 154                                                          | 79                                                                         | 54                                                                             | 35                                                                                           | 74                                                                                                         | 48                                                                                                                       |
| Cold        | 8                | 1          | 2841                                      | 3.6               | 0.029   | 2604                                                    | 3275                                                           | 671                                   | 1257                                       | 243                          | 184                                                          | 76                                                                         | 60                                                                             | 33                                                                                           | 72                                                                                                         | 39                                                                                                                       |
| Control     | 14               | 1          | 3006                                      | 5.32              | < 0.001 | 2854                                                    | 5652                                                           | 2798                                  | 3855                                       | 963                          | 704                                                          | 73                                                                         | 237                                                                            | 34                                                                                           | 278                                                                                                        | 39                                                                                                                       |
| Fungicide   | 14               | 1          | 3249                                      | 6.24              | < 0.001 | 2840                                                    | 5735                                                           | 2894                                  | 3956                                       | 997                          | 732                                                          | 73                                                                         | 244                                                                            | 33                                                                                           | 294                                                                                                        | 40                                                                                                                       |
| Control     | 8                | 1          | 771                                       | 3.4               | 0.037   | 441                                                     | 5371                                                           | 4930                                  | 6888                                       | 1673                         | 1245                                                         | 74                                                                         | 436                                                                            | 35                                                                                           | 511                                                                                                        | 41                                                                                                                       |
| Cold        | 8                | 2          | 1699                                      | 10                | < 0.001 | 1646                                                    | 1819                                                           | 173                                   | 225                                        | 48                           | 38                                                           | 79                                                                         | 18                                                                             | 47                                                                                           | 28                                                                                                         | 74                                                                                                                       |
| Control     | 8                | 2          | 1527                                      | 7.34              | < 0.001 | 1455                                                    | 1646                                                           | 191                                   | 240                                        | 59                           | 44                                                           | 75                                                                         | 15                                                                             | 34                                                                                           | 15                                                                                                         | 34                                                                                                                       |
| Fungicide   | 8                | 2          | 1470                                      | 7.55              | < 0.001 | 1464                                                    | 1814                                                           | 350                                   | 437                                        | 101                          | 78                                                           | 77                                                                         | 31                                                                             | 40                                                                                           | 40                                                                                                         | 51                                                                                                                       |
| Fungicide   | 14               | 2          | 1633                                      | 4.14              | 0.01    | 1428                                                    | 2084                                                           | 657                                   | 803                                        | 188                          | 139                                                          | 74                                                                         | 59                                                                             | 42                                                                                           | 60                                                                                                         | 43                                                                                                                       |

|           |    |    |      |      |         |      |      |      |      |     |     |    |     |    |     |    |
|-----------|----|----|------|------|---------|------|------|------|------|-----|-----|----|-----|----|-----|----|
| Cold      | 11 | 2  | 1814 | 3.68 | 0.018   | 1428 | 2270 | 842  | 1075 | 262 | 195 | 74 | 88  | 45 | 85  | 44 |
| Fungicide | 11 | 2  | 1633 | 4.01 | 0.011   | 1428 | 2375 | 947  | 1193 | 301 | 222 | 74 | 95  | 43 | 95  | 43 |
| Cold      | 14 | 3  | 1780 | 3.44 | 0.046   | 1621 | 1968 | 347  | 366  | 116 | 81  | 70 | 20  | 25 | 25  | 31 |
| Control   | 14 | 3  | 1740 | 4.29 | 0.005   | 1494 | 1968 | 474  | 465  | 150 | 103 | 69 | 28  | 27 | 34  | 33 |
| Cold      | 8  | 3  | 1301 | 8.52 | < 0.001 | 869  | 1749 | 880  | 933  | 266 | 186 | 70 | 69  | 37 | 68  | 37 |
| Fungicide | 11 | 3  | 1371 | 4.34 | 0.007   | 1308 | 2180 | 872  | 949  | 282 | 197 | 70 | 62  | 31 | 71  | 36 |
| Fungicide | 14 | 3  | 1740 | 4.22 | 0.01    | 1315 | 2206 | 891  | 967  | 290 | 202 | 70 | 64  | 32 | 76  | 38 |
| Fungicide | 14 | 4  | 420  | 9.47 | < 0.001 | 417  | 426  | 9    | 7    | 2   | 1   | 50 | 0   | 0  | 0   | 0  |
| Control   | 14 | 4  | 421  | 5.61 | < 0.001 | 161  | 476  | 315  | 274  | 80  | 59  | 74 | 19  | 32 | 21  | 36 |
| Fungicide | 11 | 4  | 418  | 9.15 | < 0.001 | 415  | 1094 | 679  | 905  | 213 | 153 | 72 | 73  | 48 | 67  | 44 |
| Fungicide | 8  | 4  | 1471 | 7.17 | < 0.001 | 415  | 1802 | 1386 | 1676 | 417 | 297 | 71 | 131 | 44 | 125 | 42 |
| Control   | 14 | 5  | 1920 | 4.64 | 0.001   | 1385 | 2105 | 721  | 744  | 215 | 156 | 73 | 56  | 36 | 68  | 44 |
| Cold      | 14 | 5  | 1593 | 5.13 | < 0.001 | 1230 | 1913 | 683  | 764  | 219 | 162 | 74 | 54  | 33 | 65  | 40 |
| Cold      | 11 | 5  | 1699 | 5.9  | < 0.001 | 773  | 1911 | 1138 | 1272 | 352 | 259 | 74 | 86  | 33 | 102 | 39 |
| Fungicide | 14 | 6  | 2299 | 3.56 | 0.027   | 1166 | 2438 | 1272 | 1099 | 342 | 244 | 71 | 82  | 34 | 93  | 38 |
| Cold      | 14 | 7  | 841  | 4.01 | 0.014   | 428  | 1893 | 1464 | 1194 | 440 | 224 | 51 | 90  | 40 | 103 | 46 |
| Cold      | 11 | 8  | 430  | 7.65 | < 0.001 | 348  | 446  | 99   | 132  | 27  | 22  | 81 | 9   | 41 | 7   | 32 |
| Cold      | 14 | 8  | 398  | 6.62 | < 0.001 | 348  | 446  | 99   | 132  | 27  | 22  | 81 | 9   | 41 | 7   | 32 |
| Control   | 14 | 11 | 524  | 4.71 | < 0.001 | 329  | 581  | 252  | 324  | 84  | 67  | 80 | 24  | 36 | 37  | 55 |
| Fungicide | 14 | 11 | 533  | 4.48 | 0.007   | 271  | 1160 | 889  | 1064 | 275 | 203 | 74 | 76  | 37 | 100 | 49 |

<sup>a</sup> Markers flanking Bayes confidence interval.

<sup>b</sup> Numbers refer to within Bayes confidence interval.



**Table S10 Genes within large-effect QTL regions (confidence intervals containing  $\leq 30$  candidate genes) for cross 3D1 x 3D7, excluding genes with no sequence variation or with only synonymous SNPs.**

| Protein ID <sup>a</sup>                | Gene ontology Name                                                              | Gene ontology biological process                                                     | Gene ontology cellular component                         | Gene ontology molecular function                                                 | Number of Non-Syn SNPs <sup>b</sup> | Number of other sequence variations <sup>b c</sup> | Additional information | Highest RPKM mean <sup>d</sup> | RPKM Stdv |
|----------------------------------------|---------------------------------------------------------------------------------|--------------------------------------------------------------------------------------|----------------------------------------------------------|----------------------------------------------------------------------------------|-------------------------------------|----------------------------------------------------|------------------------|--------------------------------|-----------|
| Chromosome 10 (Phenotype: 11 dpi cold) |                                                                                 |                                                                                      |                                                          |                                                                                  |                                     |                                                    |                        |                                |           |
| 101405                                 | catalytic activity                                                              | acetyl-CoA metabolic process; acetate metabolic process; pyruvate metabolic process; | cytosol; mitochondrion; acetate CoA-transferase complex; | acetate CoA-transferase activity; acetyl-CoA hydrolase activity;                 | 2 (M)                               | 0                                                  | /                      | 71.4 (13dpi)                   | 17.4      |
| 105917 <sup>o</sup>                    | 5-methyltetrahydropteroyltriglutamate-homocysteine S-methyltransferase activity | methionine biosynthetic process; methylation;                                        | Not described                                            | 5-methyltetrahydropteroyltriglutamate-homocysteine S-methyltransferase activity; | 3 (M)                               | 2 upstream (m), 1 UTR5 Prime (m)                   | /                      | 148.0 (7dpi)                   | 24.0      |
| 111014                                 | proteolysis                                                                     | proteolysis;                                                                         | Not described                                            | serine-type peptidase activity;                                                  | 7 (M)                               | 2 intron (m), 1 UTR5 Prime (m)                     | /                      | 49.8 (7dpi)                    | 43.3      |
| 96183                                  | Not described                                                                   | Not described                                                                        | Not described                                            | Not described                                                                    | 5 (M)                               | 2 intron (m)                                       | /                      | 0 (No                          | 0.0       |

|            |                              |                                                                      |                       |                                                        |        |                   |                                                                                                                                                  | Specific Day)              |      |
|------------|------------------------------|----------------------------------------------------------------------|-----------------------|--------------------------------------------------------|--------|-------------------|--------------------------------------------------------------------------------------------------------------------------------------------------|----------------------------|------|
| 76249 °    | protein kinase activity      | protein phosphorylation; serine family amino acid metabolic process; | Not described         | ATP binding; protein serine/threonine kinase activity; | 3 (M)  | 0                 | Name: MgPbs2<br>(Hypothetical MAP kinase kinase (MAPKK) involved in the osmosensing signal-transduction pathway, activated under severe osmotic) | 139.2 (7dpi) <sup>□□</sup> | 31.8 |
| 101408 # ° | integral to membrane         | transmembrane transport;                                             | integral to membrane; | Not described                                          | 2 (M)  | 0                 | Transporter - auxin efflux carrier-like with six predicted transmembrane regions                                                                 | 168.0 (8wpi) <sup>□□</sup> | 24.3 |
| 48576 °    | amino acid transport         | amino acid transmembrane transport;                                  | integral to membrane; | amino acid transmembrane transporter activity;         | 18 (M) | 1 intron (m)      | /                                                                                                                                                | 15.5 (8wpi) <sup>□□□</sup> | 1.4  |
| 76256 °    | N-acetyltransferase activity | acyl-carrier-protein biosynthetic process;                           | Not described         | N-acetyltransferase activity;                          | 2 (M)  | 1 frame shift (H) | /                                                                                                                                                | 24.9 (13dpi)               | 8.6  |

|                                          |                 |                                                                                                                                          |                               |                                                                           |       |                                  |                                                                                                                                                        |                                            |      |
|------------------------------------------|-----------------|------------------------------------------------------------------------------------------------------------------------------------------|-------------------------------|---------------------------------------------------------------------------|-------|----------------------------------|--------------------------------------------------------------------------------------------------------------------------------------------------------|--------------------------------------------|------|
| 48696                                    | DNA binding     | regulation of transcription, DNA-dependent;                                                                                              | transcription factor complex; | sequence-specific DNA binding transcription factor activity; DNA binding; | 0     | 1 upstream (m), 1 intron (m)     | Name: MgSwi6<br>(Hypothetical transcription factor that is related to DNA binding component of the SBF complex (Swi4p-Swi6p) in <i>S. cerevisiae</i> ) | 12.3<br>(13dpi) <sup>8</sup> <sup>10</sup> | 3.1  |
| 76259                                    | Not described   | oxidation-reduction process; tryptophan metabolic process; peroxidase reaction; response to oxidative stress; methane metabolic process; | Not described                 | heme binding; catalase activity;                                          | 1 (M) | 0                                | /                                                                                                                                                      | 70.7<br>(8wpi) <sup>8</sup> <sup>10</sup>  | 12.6 |
| 101410                                   | protein binding | Not described                                                                                                                            | Not described                 | Not described                                                             | 1 (M) | 1 upstream (m), 1 UTR5 Prime (m) | /                                                                                                                                                      | 413.6<br>(7dpi) <sup>8</sup> <sup>10</sup> | 64.8 |
| 105922                                   | Not described   | Not described                                                                                                                            | Not described                 | Not described                                                             | 0     | 1 UTR5 Prime (m)                 | /                                                                                                                                                      | 48.9<br>(13dpi) <sup>8</sup> <sup>10</sup> | 6.7  |
| Chromosome 11 (Phenotype: 8 dpi control) |                 |                                                                                                                                          |                               |                                                                           |       |                                  |                                                                                                                                                        |                                            |      |
| 96588 °                                  | Not described   | Not described                                                                                                                            | intracellular;                | zinc ion binding; nucleic acid binding;                                   | 1 (M) | 1 intron (m)                     | /                                                                                                                                                      | 2.0 (8wpi)                                 | 0.6  |

|             |                                  |                                                                          |                    |                                                                     |       |                |                                                                                                                                                                                                  |             |      |
|-------------|----------------------------------|--------------------------------------------------------------------------|--------------------|---------------------------------------------------------------------|-------|----------------|--------------------------------------------------------------------------------------------------------------------------------------------------------------------------------------------------|-------------|------|
| 50123       | ubiquitin thiolesterase activity | ubiquitin-dependent protein catabolic process; protein deubiquitination; | Not described      | ubiquitin thiolesterase activity; cysteine-type peptidase activity; | 0 (M) | 2 intron (m)   | /                                                                                                                                                                                                | 31.9 (8wpi) | 3.9  |
| 96591 # ° § | protein folding                  | protein folding;                                                         | prefoldin complex; | unfolded protein binding;                                           | 0 (M) | 1 upstream (m) | /                                                                                                                                                                                                | 91.4 (8wpi) | 11.0 |
| 96592 ° §   | catalytic activity               | biosynthetic process;                                                    | Not described      | hydrolase activity, acting on ester bonds; transferase activity;    | 3 (M) | 0              | Name: <i>PKS1</i> (polyketide synthase gene highly similar to those involved in fungal melanin biosynthesis; contains conserved domains typically found in PKSs that synthesize fungal pigments) | 7.8 (8wpi)  | 0.6  |

<sup>a</sup>A # Indicates the QTL peak is positioned closest to this gene or within the gene. A ° Indicates candidate genes with a higher priority of contributing to melanization compared to unmarked candidate genes. § Indicates orthologs in *Z. tritici* to genes involved in melanin biosynthesis (Table S5).

<sup>b</sup>The letter within brackets following the number of a specific sequence polymorphism refers to the likely impact of the sequence polymorphism according to SnpEff. H=high, M=moderate, L=low, m=modifier.

<sup>c</sup>Other sequence variations include codon change plus insertion/deletion, codon insertion/deletions, 100 bp upstream or downstream, frame shift, intron, splice site acceptor/donor, start gained/lost, stop gained/lost, untranslated regions (UTR).

<sup>d</sup>We chose a RPKM value of 2 as an expression threshold. <sup>e</sup>A <sup>¶</sup>Indicates significant changes in transcript abundances over time.

**Table S11 Genes within large-effect QTL regions (confidence intervals containing ≤ 30 candidate genes) for cross 1A5 x 1E4, excluding genes with no sequence variation or with only synonymous SNPs.**

| Protein ID <sup>a</sup>                    | Gene ontology Name            | Gene ontology biological process                             | Gene ontology cellular component | Gene ontology molecular function                                                                 | Number of Non-Syn SNPs <sup>b</sup> | Number of other sequence variations <sup>b c</sup> | Additional information | Highest RPKM mean <sup>d</sup> | RPKM Stdv |
|--------------------------------------------|-------------------------------|--------------------------------------------------------------|----------------------------------|--------------------------------------------------------------------------------------------------|-------------------------------------|----------------------------------------------------|------------------------|--------------------------------|-----------|
| Chromosome 4 (Phenotype: 14 dpi fungicide) |                               |                                                              |                                  |                                                                                                  |                                     |                                                    |                        |                                |           |
| 92291 # <sup>o</sup>                       | transcription factor activity | regulation of transcription from RNA polymerase II promoter; | nucleus;                         | sequence-specific DNA binding RNA polymerase II transcription factor activity; zinc ion binding; | 0 (M)                               | 4 downstream (m), 1 upstream (m), 2 intron (m)     | /                      | 80.7 (7 dpi)                   | 21.9      |
| Chromosome 8 (Phenotype: 11 dpi cold)      |                               |                                                              |                                  |                                                                                                  |                                     |                                                    |                        |                                |           |
| 94941                                      | Not described                 | Not described                                                | Not described                    | Not described                                                                                    | 0 (M)                               | 4 intron (m)                                       | /                      | 14.7 (13dpi)                   | 4.8       |
| 94942                                      | Not described                 | Not described                                                | Not described                    | Not described                                                                                    | 16 (M)                              | 0                                                  | /                      | 0.2 (8wpi)                     | 0.2       |
| 14031                                      | Not described                 | Not described                                                | Not described                    | Not described                                                                                    | 9 (M)                               | 1 upstream (m)                                     | /                      | 3.2 (13dpi)                    | 1.6       |
| 74422                                      | Not described                 | Not described                                                | Not described                    | Not described                                                                                    | 0 (M)                               | 1 intron (m)                                       | /                      | 33.2 (13dpi)                   | 5.9       |

|        |                                            |                                                                                        |               |                                                           |       |                                   |                                                                                                                                                                                                                                                                                                                                                                   |                             |      |
|--------|--------------------------------------------|----------------------------------------------------------------------------------------|---------------|-----------------------------------------------------------|-------|-----------------------------------|-------------------------------------------------------------------------------------------------------------------------------------------------------------------------------------------------------------------------------------------------------------------------------------------------------------------------------------------------------------------|-----------------------------|------|
| 94946  | Not described                              | Not described                                                                          | Not described | Not described                                             | 7 (M) | 0                                 | /                                                                                                                                                                                                                                                                                                                                                                 | 4.3<br>(13dpi) <sup>□</sup> | 2.9  |
| 100879 | glucose-6-phosphate dehydrogenase activity | pentose-phosphate shunt; response to hydrogen peroxide; glutathione metabolic process; | cytoplasm;    | glucose-6-phosphate dehydrogenase activity; NADP binding; | 0 (M) | 1 downstream (m),<br>2 UTR5 Prime | Name: G6PD (EC 1.1.1.49<br>glucose-6-phosphate dehydrogenase; NADP-glucose-6-phosphate dehydrogenase; Zwischenferment; D-glucose 6-phosphate dehydrogenase; glucose 6-phosphate dehydrogenase (NADP); NADP-dependent glucose 6-phosphate dehydrogenase; 6-phosphoglucose dehydrogenase; Entner-Doudoroff enzyme; glucose-6-phosphate 1-dehydrogenase; G6PDH; GPD) | 623.7<br>(8wpi)             | 33.8 |

|       |                                    |                                                                |                                                  |                                                   |       |                                                                 |                                                                                                                                                                                                                                                  |                |       |
|-------|------------------------------------|----------------------------------------------------------------|--------------------------------------------------|---------------------------------------------------|-------|-----------------------------------------------------------------|--------------------------------------------------------------------------------------------------------------------------------------------------------------------------------------------------------------------------------------------------|----------------|-------|
| 74429 | structural constituent of ribosome | translation; ribosome biogenesis;                              | ribosome;                                        | structural constituent of ribosome;               | 0 (M) | 2 downstream (m),<br>1 upstream (m), 2 intron (m), 4 UTR3 Prime | /                                                                                                                                                                                                                                                | 2315.0 (13dpi) | 194.8 |
| 87034 | Not described                      | ribosomal large subunit assembly;                              | nucleolus; preribosome, large subunit precursor; | 5S rRNA binding; rRNA primary transcript binding; | 3 (M) | 0                                                               | /                                                                                                                                                                                                                                                | 58.2 (13dpi)   | 6.8   |
| 87035 | DNA binding                        | transcription, DNA-dependent; response to DNA damage stimulus; | membrane;                                        | DNA binding; ATP binding; helicase activity;      | 1 (M) | 1 downstream (m)                                                | Homolog of <i>Saccharomyces cerevisiae</i> INO80, a Swi2/Snf2-related ATPase that forms a large complex, containing actin and several actin-related proteins, that has chromatin remodeling activity and 3' to 5' DNA helicase activity in vitro | 36.0 (13dpi)   | 6.0   |

|          |                                   |                                                                      |                              |                                                                      |       |                                                   |                                                                                                                                                                  |                           |      |
|----------|-----------------------------------|----------------------------------------------------------------------|------------------------------|----------------------------------------------------------------------|-------|---------------------------------------------------|------------------------------------------------------------------------------------------------------------------------------------------------------------------|---------------------------|------|
| 46572    | Not described                     | Not described                                                        | Not described                | Not described                                                        | 0 (M) | 1 upstream (m), 1 intron (m)                      | /                                                                                                                                                                | 107.2 (7dpi) <sup>□</sup> | 18.9 |
| 27012    | phospholipid biosynthetic process | phospholipid biosynthetic process;                                   | membrane;                    | phosphotransferase activity, for other substituted phosphate groups; | 0 (M) | 2 upstream (m)                                    | Putative CDP-alcohol phosphatidyltransferase. Shows some sequence similarity to cardiolipin synthase. Predicted signal peptide. Predicted membrane localization. | 10.0 (7dpi)               | 5.5  |
| 110344 ° | Not described                     | nuclear mRNA cis splicing, via spliceosome; mRNA transport;          | nuclear cap binding complex; | RNA cap binding;                                                     | 4 (M) | 1 downstream (m), 2 frame shift (H), 1 intron (m) | /                                                                                                                                                                | 48.6 (13dpi) <sup>□</sup> | 5.2  |
| 46635    | nucleus                           | nuclear mRNA splicing, via spliceosome; cellular bud site selection; | U2 snRNP;                    | Not described                                                        | 0 (M) | 2 intron (m)                                      | /                                                                                                                                                                | 69.1 (7dpi)               | 25.6 |



|         |                            |                                                                               |                |                                                                 |        |                                   | Name: GSK3<br>(serine/threonine protein<br>kinase, CMGC family,<br>glycogen synthase kinase<br>subfamily) |                               |      |
|---------|----------------------------|-------------------------------------------------------------------------------|----------------|-----------------------------------------------------------------|--------|-----------------------------------|-----------------------------------------------------------------------------------------------------------|-------------------------------|------|
| 100881  | protein kinase<br>activity | protein<br>phosphorylation; serine<br>family amino acid<br>metabolic process; | Not described  | ATP binding;<br>protein<br>serine/threonine<br>kinase activity; | 0 (M)  | 3 intron (m), 1 UTR5<br>Prime (m) |                                                                                                           | 180.8<br>(13dpi) <sup>□</sup> | 51.8 |
| 87038   | Not described              | Not described                                                                 | Not described  | nucleotide binding;                                             | 2 (M)  | 0                                 | /                                                                                                         | 1.1<br>(7dpi)                 | 1.8  |
| 29926 ° | Not described              | Not described                                                                 | Not described  | Not described                                                   | 0 (M)  | 1 upstream (m), 6<br>intron (m)   | /                                                                                                         | 31.7<br>(13dpi) <sup>□</sup>  | 3.2  |
| 74444 ° | tRNA processing            | mitochondrial tRNA<br>wobble uridine<br>modification;                         | mitochondrion; | flavin adenine<br>dinucleotide<br>binding;                      | 10 (M) | 2 intron (m)                      | /                                                                                                         | 31.5<br>(7dpi)                | 9.5  |
| 87039 # | Not described              | Not described                                                                 | membrane;      | Not described                                                   | 3 (M)  | 0                                 | /                                                                                                         | 0 (No<br>Specific<br>Day)     | 0    |
| 46302 ° | protein kinase<br>activity | protein<br>phosphorylation; serine<br>family amino acid<br>metabolic process; | Not described  | ATP binding;<br>protein<br>serine/threonine<br>kinase activity; | 4 (M)  | 4 downstream (m),<br>2 intron (m) | /                                                                                                         | 21.6<br>(13dpi)               | 2.0  |

|          |                      |                        |               |                                              |       |                                 |                                                                                        |                          |     |
|----------|----------------------|------------------------|---------------|----------------------------------------------|-------|---------------------------------|----------------------------------------------------------------------------------------|--------------------------|-----|
| 110348 ° | nucleic acid binding | DNA catabolic process; | Not described | endonuclease activity; nucleic acid binding; | 7 (M) | 0                               | /                                                                                      | 4.5 (7dpi)               | 4.5 |
| 94962 °  | Not described        | Not described          | Not described | Not described                                | 3 (M) | 0                               | /                                                                                      | 13.0 (7dpi) <sup>□</sup> | 7.7 |
| 110349 ° | Not described        | Not described          | Not described | Not described                                | 9 (M) | 3 frame shift (H), 3 intron (m) | putative secreted protein unknown function, probable unique to <i>M. graminicola</i> . | 11.8 (7dpi)              | 8.3 |

<sup>a</sup> A # Indicates the QTL peak is positioned closest to this gene or within the gene. A ° Indicates candidate genes with a higher priority of contributing to melanization compared to unmarked candidate genes. <sup>§</sup> Indicates orthologs in *Z. tritici* to genes involved in melanin biosynthesis (Table S5).

<sup>b</sup> The letter within brackets following the number of a specific sequence polymorphism refers to the likely impact of the sequence polymorphism according to SnpEff. H=high, M=moderate, L=low, m=modifier.

<sup>c</sup> Other sequence variations include codon change plus insertion/deletion, codon insertion/deletions, 100 bp upstream or downstream, frame shift, intron, splice site acceptor/donor, start gained/lost, stop gained/lost, untranslated regions (UTR).

<sup>d</sup> We chose a RKPM value of 2 as an expression threshold. <sup>□</sup>A <sup>□</sup>Indicates significant changes in transcript abundances over time.

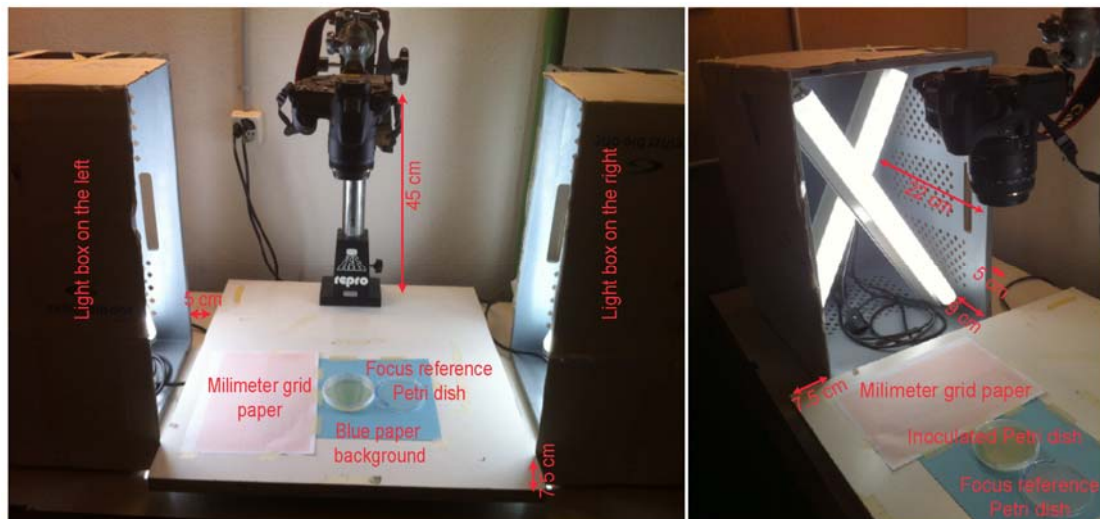

**Figure S1** Camera and light setup overview.

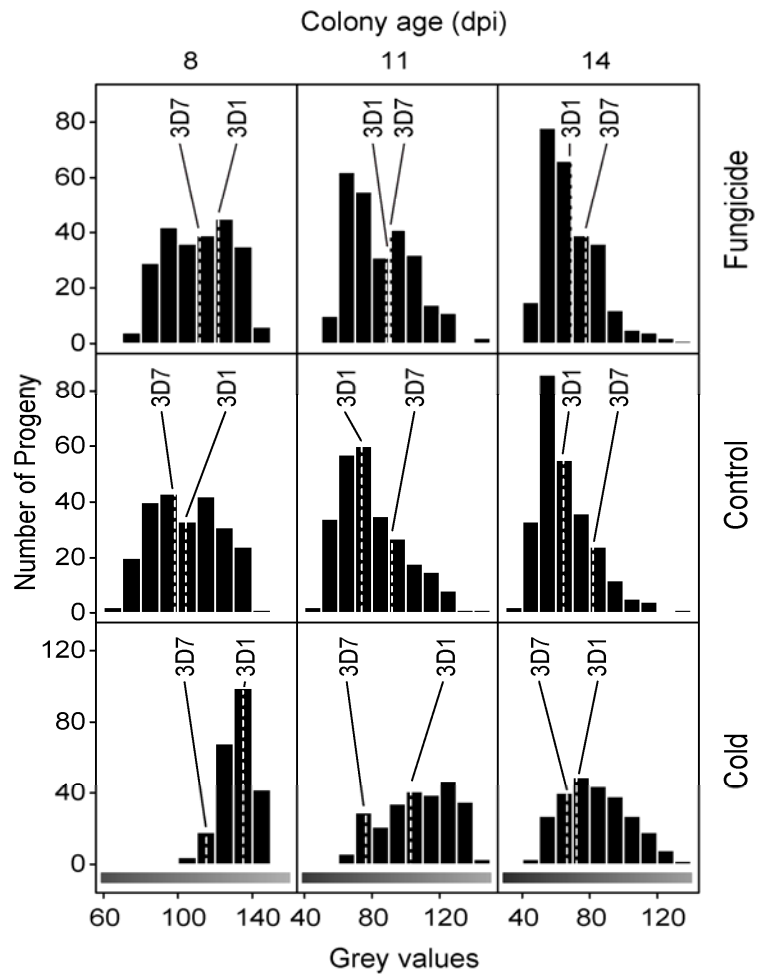

**Figure S2** Melanization measured in the cross 3D1 x 3D7 over the three different environments. Each environment is represented by the three colony ages. The rug just above the grey values corresponds to the intensity of grey shading. Melanization increases as time progresses, indicated with lower mean values for older colonies.

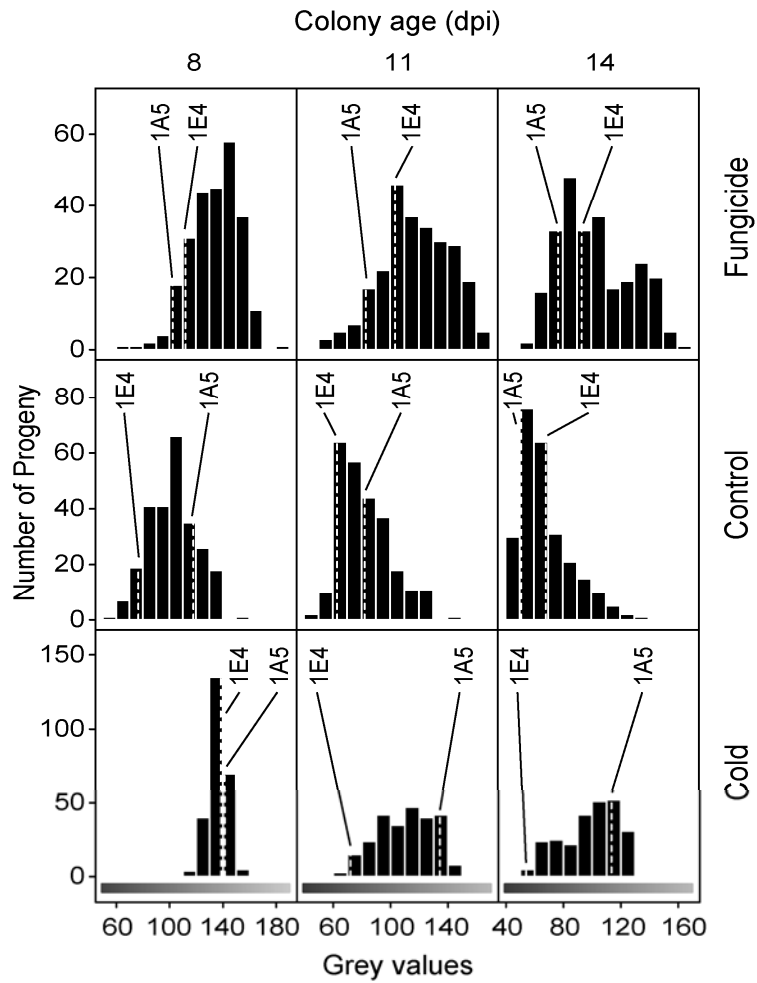

**Figure S3** Melanization measured in the cross 1A5 x 1E4 over the three different environments. Each environment is represented by the three colony ages. The rug just above the grey values corresponds to the intensity of grey shading. Melanization increases as time progresses, indicated with lower mean values for older colonies.

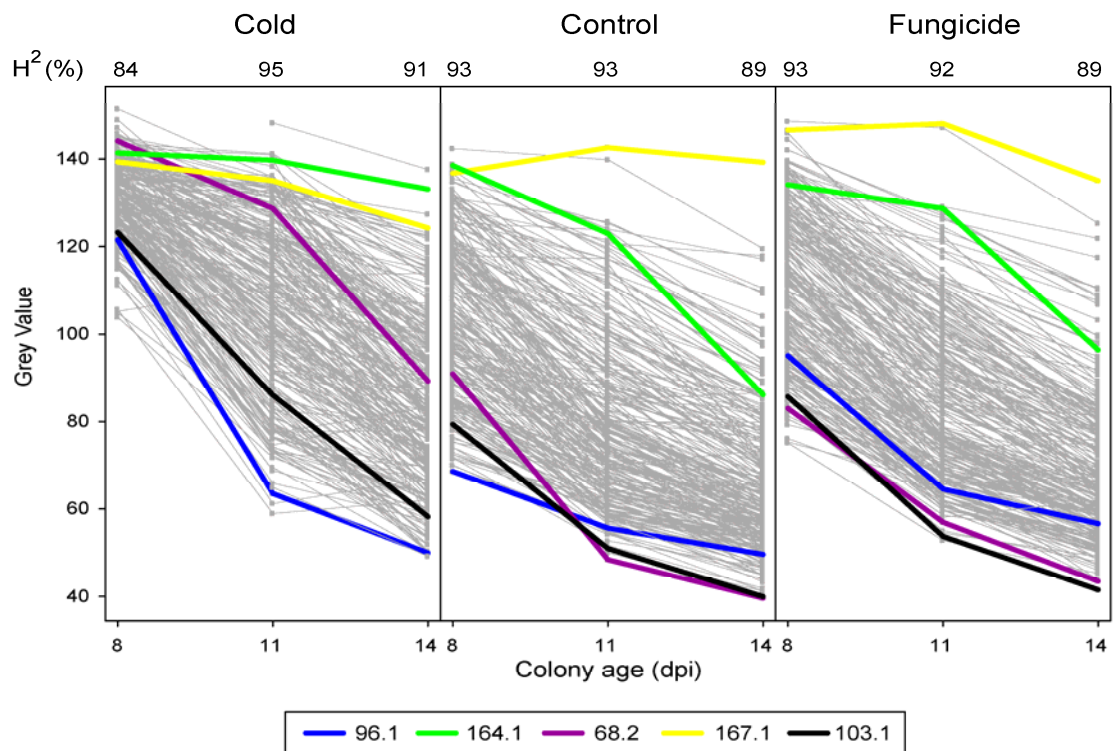

**Figure S4** Norms of reaction for the cross 3D1 x 3D7 across the three colony ages and environments. The two progeny with the most extreme (highest and lowest), complete phenotypes found at 14 dpi colony age in each environment are highlighted in the two other environments. Broad-sense heritability ( $H^2$ ) values are indicated for each ECAM phenotype.

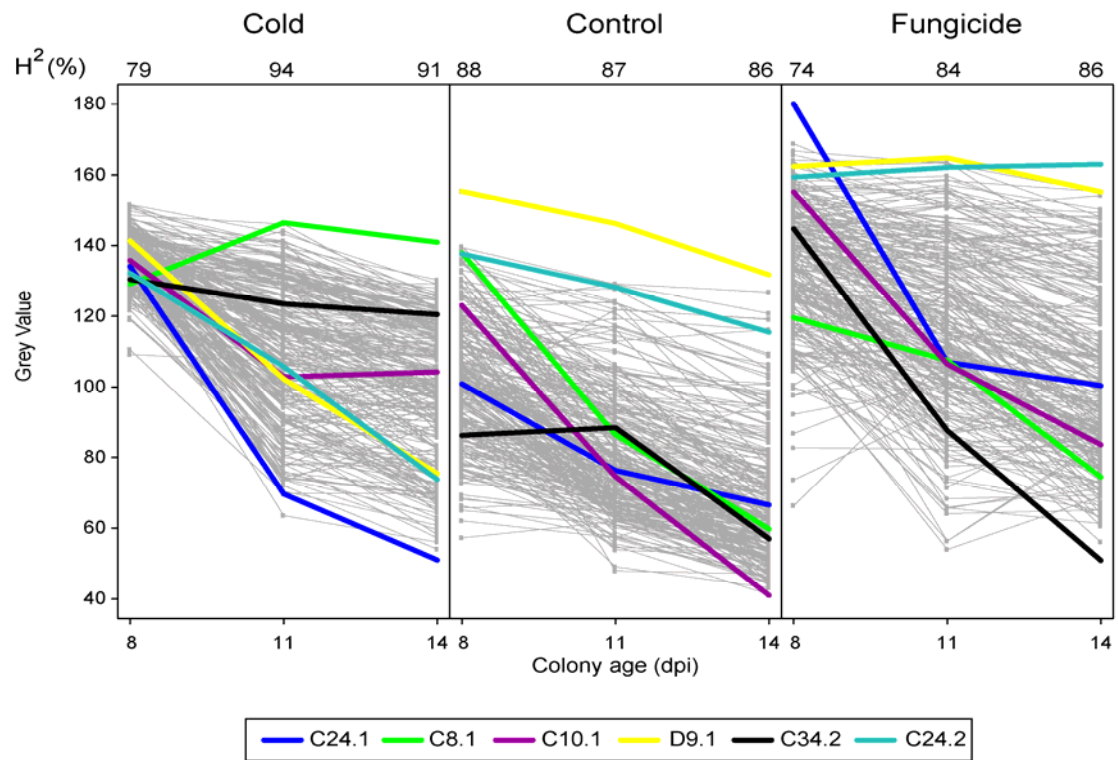

**Figure S5** Norms of reaction for the cross 1A5 x1E4 across the three colony ages and environments. The two progeny with the most extreme (highest and lowest), complete phenotypes found at 14 dpi colony age in each environment are highlighted in the two orhter environments. Broad-sense heritability ( $H^2$ ) values are indicated for each ECAM phenotype.

## File S1

### Fiji Batch Macro

#### Important Macro Information:

The following macro can be used in Fiji. To run the macro, do the following:

1. Create a folder (e.g. 'Main Folder').
2. Place your JPEG images to be analyzed into the folder.
3. Create the following subfolders within the folder:
  - a. FinalSummary
  - b. HSVtemp
  - c. Labels
  - d. Macro Used
  - e. Masks
  - f. OutlinesAndBackground
  - g. Results
4. Save the following macro-text in a normal text file into the folder 'Macro Used'.
5. Open ImageJ/Fiji and select from the menu 'Plugins -> Macros -> Run'.
6. Select the txt file, where the macro-text has been saved.
7. Select the 'Main Folder' and your macro should run automatically.

#### Additional notes:

1. The macro requires more or less circular colony growth of the target organism.
2. This macro as shown here is suitable for Fiji version 1.47i running on a mac computer. For a windows computer, singular forward slashes (/) need to be changed into double back slashes (\\), except for the forward slash in the command: (endsWith(list[i], "/").
3. The speed of the batch macro can be optimized by deactivating commands that generate masks (e.g. all commands which contain 'HSVtemp'). Deactivation can be conducted by applying two forward slashes in front of the command.
4. To avoid scoring of noise particles (including the polygon selection created during the macro) and fused colonies, we recommend to apply a subset onto the individual image results tables, by selecting for only particles providing a roundness value above 0.9. We used a loop in R to do so.



5. Settings most likely need to be adjusted if using a different organism than *Z. tritici* and different light and camera settings. Under same light and camera settings, we were able to apply the macro also for other plant pathogenic fungi, such as *Rhynchosporium commune*.

Detailed information regarding camera and light setup can be found in Table S2 and Figure S1. Detailed information regarding camera settings can be found in Table S3.

THE BATCH MACRO:

```
//*****  
//Batch macro: "Image Analysis; Zymoseptoria tritici; Size and Grey Value Measure of Single Spore Colony on Petri  
Dish"  
  
//Author: Mark Lendenmann, Plant Pathology Group, ETH Zurich  
  
//Measures size and grey value of single spore colonies grown on Petri dishes.  
//Creates single image results tables, labeled overlay masks on binary image, labeled outline masks on original  
image, overall summary table  
  
//*****  
// 1. SET SCALE: e.g. pixels to square millimeters / SET MEASUREMENTS – change this to suit images  
  
open("/Users/Imark/Desktop/Fiji Macro on this Mac/Calibration_45cm_9468.JPG");  
run("In");  
makeLine(1980, 1338, 2250, 1338);  
run("Set Scale...", "distance=270 known=10 pixel=1 unit=mm global");  
close();  
  
//*****  
// 2. BATCH PROCESS: IMAGE THRESHOLDING, LABELS AND MASKS SAVING OF EACH IMAGE, RESULTS WITH  
PARTICLE AREA AND MEAN GREY VALUE, OUTLINE MASKS SAVED  
  
macro "Image Analysis Colony Sizes" {
```

```

dir = getDirectory("Choose a Directory ");

print ("Chose Directory:" + dir);

list = getFileList(dir);

print("Directory contains "+list.length+" files and subfolders");

setBatchMode(true);

for (i=0; i<list.length; i++) {

if (endsWith(list[i], "/")) {

print("File is a subfolder and is ignored");

}

else {

if (endsWith(list[i], ".db")) {

print("File is a Thumbs.db file and is ignored");

}

else {

path = dir+list[i];

IJ.freeMemory();

print("Free memory:", call("ij.IJ.freeMemory"));

open(path);

name = File.getName(path);

nameshort = File.nameWithoutExtension;

print("Path:", path);

print("Name:", name);

print("Directory:", dir);

// run("Threshold...");

// Color Thresholder 1.46b

// Autogenerated macro, single images only!

min=newArray(3);

max=newArray(3);

filter=newArray(3);

a=getTitle();

run("HSB Stack");

```

```

run("Convert Stack to Images");

selectWindow("Hue");

saveAs("Jpeg", dir+"/HSVtemp/"+nameshort+"Hue.jpg");

rename("0");

selectWindow("Saturation");

saveAs("Jpeg", dir+"/HSVtemp/"+nameshort+"Saturation.jpg");

rename("1");

selectWindow("Brightness");

saveAs("Jpeg", dir+"/HSVtemp/"+nameshort+"Brightness.jpg");

rename("2");

min[0]=57;

max[0]=190;

filter[0]="stop";

min[1]=0;

max[1]=255;

filter[1]="pass";

min[2]=0;

max[2]=255;

filter[2]="pass";

for (j=0;j<3;j++){

selectWindow(""+j);

setThreshold(min[j], max[j]);

saveAs("Jpeg", dir+"/HSVtemp/"+nameshort+"HSVRed"+j+".jpg");

rename(j);

run("Convert to Mask");

saveAs("Jpeg", dir+"/HSVtemp/"+nameshort+"HSVRed"+j+".jpg");

rename(j);

if (filter[j]=="stop") run("Invert");

}

imageCalculator("AND create", "0", "1");

imageCalculator("AND create", "Result of 0", "2");

for (k=0;k<3;k++){

```

```

selectWindow(""+k);

close();

}

selectWindow("Result of 0");

close();

selectWindow("Result of Result of 0");

rename(a);

// Colour Thresholding-----

//*****

// 2.1 ANALYZE PARTICLES: NOTE: The Selections are saved to the RoiManager.

run("Set Measurements...", "area mean min fit shape redirect=None decimal=3");

run("Analyze Particles...", "size=0.70-Infinity circularity=0.3-1.00 show=[Overlay Masks] display clear include
summarize add");

//*****

// 2.1.1 CALL PLUGIN TO SET LABEL BACKGROUND FILL COLOR, LABEL COLOR AND FONT

// !!!!! NOTE: Here you can make changes for the background of the labels, stroke-color (=outline color), width,
fill and even for the labels color and font size!!!!

call("ij.plugin.filter.ParticleAnalyzer.setFontSize", 50);

run("Overlay Options...", "stroke=yellow width=1 fill=cyan apply");

run("Labels...", "color=black font=30 show bold");

//*****

// 2.2 SAVE MASKS AND LABELS

saveAs("Jpeg", dir+"/Labels/"+nameshort+"label.jpg");

run("Remove Overlay");

saveAs("Jpeg", dir+"/Masks/"+nameshort+"mask.jpg");

//*****

```

```
// 2.3 SAVE RESULTS FORMED ON ORIGINAL IMAGE
```

```
run("Clear Results");

open(path);

rename("D");

print("Path:", path);

print("Name:", name);

print("Directory:", dir);

//Note: We add a small polygon with a very low roundness, just so the RoiManager isn't empty!

makePolygon(4102,3206,4099,3207,4106,3206,4104,3204);

roiManager("Add");

roiManager("Measure");

selectWindow("D");

roiManager("Set Color", "yellow");

roiManager("Set Line Width", 2.5);

run("From ROI Manager");

run("Labels...", "color=yellow font=30 show");

saveAs("Jpeg", dir+"/OutlinesAndBackground/"+nameshort+"outline.jpg");

run("Close");

run("Select None");

selectWindow("Results");

saveAs("Text", dir+"/Results/"+nameshort+"results.txt");

selectWindow("Results");

run("Close");

selectWindow("Log");

run("Close");

roiManager("Delete");

} //ends else if statement

} //ends else statement

} // end for loop batch processing complete folder
```

```
//*****  
  
// 3. SAVE THE FINAL SUMMARY TO A NEW FOLDER NAMED "SUMMARY"  
  
selectWindow("Summary");  
  
saveAs("Text", dir+"/FinalSummary/"+"Final"+"summary.txt");  
  
run("Close");  
  
print("Macro is finished");  
  
beep();  
  
} //end macro
```
