# Supplementary material for: Quantitative Trait Locus Mapping of Melanization in the Plant Pathogenic Fungus Zymoseptoria tritici
Source: PubMed Central journal article supplement (PMC4267946; doi:10.1534/g3.114.015289), 2014-10-29
Supplement: supp_g3.114.015289_FigureS1.pdf [file supp_g3.114.015289_FigureS1.pdf]

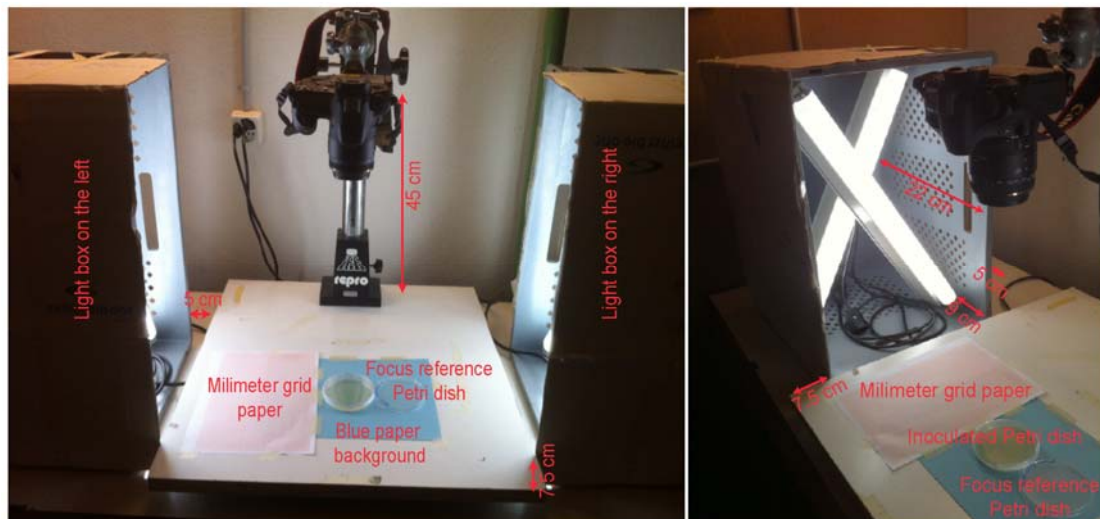

**Figure S1** Camera and light setup overview.
