# Supplementary material for: Quantitative Trait Locus Mapping of Melanization in the Plant Pathogenic Fungus Zymoseptoria tritici
Source: PubMed Central journal article supplement (PMC4267946; doi:10.1534/g3.114.015289), 2014-10-29
Supplement: supp_g3.114.015289_TableS2.pdf [file supp_g3.114.015289_TableS2.pdf]

**Table S2 Camera and light setup overview.**

| Parameter             | Specification                                                                               |
|-----------------------|---------------------------------------------------------------------------------------------|
| Camera height         | 45 cm                                                                                       |
| Lights                | Two boxes with each two light bulbs (set up as a X). Boxes are setup to the left and right! |
| Bulbs                 | PHILIPHS TL 20W/55 DE LUXE                                                                  |
| Background            | Blue paper (single layered)                                                                 |
| Calibration reference | Millimeter grid paper                                                                       |
| Focus reference       | Petri dish lid with a labeling 'Focus Reference'                                            |
