# Supplementary material for: Quantitative Trait Locus Mapping of Melanization in the Plant Pathogenic Fungus Zymoseptoria tritici
Source: PubMed Central journal article supplement (PMC4267946; doi:10.1534/g3.114.015289), 2014-10-29
Supplement: supp_g3.114.015289_TableS3.pdf [file supp_g3.114.015289_TableS3.pdf]

**Table S3 Detailed information on the camera and lens used during image taking, as well as detailed information regarding the camera settings.**

| Camera type / Parameter <sup>a</sup> | Specification / Settings             |
|--------------------------------------|--------------------------------------|
| Body                                 | CANON EOS 60D Body                   |
| Lens                                 | CANON EF 50mm F/2.5 Compact Macro    |
| ISO-Sensitivity                      | 200                                  |
| Aperture (Depth of field)            | 14                                   |
| Shutter speed 1)                     | 5                                    |
| Focus point 2)                       | Set to the most right square         |
| Light exposure measurement           | full                                 |
| Quality                              | RAW (5184x3456) and JPEG (5184x3456) |
| Peripheral illumin. Correct.         | Enable                               |
| Red-eye reduc.                       | Disable                              |
| Flash control (Flash firing)         | Disable                              |
| Expo.comp./AEB                       | Set to Zero (in the center)          |
| Auto Lighting Optimizer              | Standard                             |
| Picture Style                        | Standard                             |
| White Balance                        | AWB (=automatic)                     |
| WB Shift/BKT                         | 0,0/±0                               |
| Color space                          | sRGB                                 |
| ISO Auto                             | Max: 3200                            |
| Live View shoot.                     | Enable                               |
| AF mode                              | Live mode                            |
| Grid display                         | OFF                                  |
| Aspect ratio                         | 3:2                                  |
| Expo.simulation                      | Enable                               |
| Silent shooting                      | Mode 1                               |
| Metering timer                       | 4 sec.                               |
| File numbering                       | Continuous                           |

<sup>a</sup> 1) The shutter speed was set to 5, because under the specific light settings this value provided optimal illumination conditions. 2) The focus point was not set onto the fungal colonies, but to a Petri dish lid, just beside the plate containing the colonies. This additional lid was labeled with 'Focus Reference'. This labeling was at the same height as the fungal colonies, thus resulting for all colonies in sharp images, even if the height of the medium varied a bit.
