# Supplementary material for: Quantitative Trait Locus Mapping of Melanization in the Plant Pathogenic Fungus Zymoseptoria tritici
Source: PubMed Central journal article supplement (PMC4267946; doi:10.1534/g3.114.015289), 2014-10-29
Supplement: supp_g3.114.015289_TableS5.pdf [file supp_g3.114.015289_TableS5.pdf]

**Table S5 Orthologs in *Z. tritici* to genes involved in melanin biosynthesis**

| Protein ID | Name <sup>a</sup>           | Chromosome | Start (bp) | Stop (bp) | Melanin pathway function                                | Melanin pathway | Mutant effect         | Tested in <i>Z. tritici</i> | Highest RPKM mean <sup>b</sup> | RPKM Stdv | Reference <sup>c</sup>                                                                                                               |
|------------|-----------------------------|------------|------------|-----------|---------------------------------------------------------|-----------------|-----------------------|-----------------------------|--------------------------------|-----------|--------------------------------------------------------------------------------------------------------------------------------------|
| 96592      | <i>PKS1</i> <sup>1)</sup>   | 11         | 586456     | 593034    | Polyketide synthase encoding gene                       | DHN             | Full loss of function | No                          | 7.8 (8wpi) *                   | 0.6       | (TAKANO <i>et al.</i> 1995; BUTLER and DAY 1998; LANGFELDER <i>et al.</i> 2003 <sup>2)</sup> ; HU <i>et al.</i> 2012 <sup>1)</sup> ) |
| 68710      | <i>THR2</i> <sup>2)</sup>   | 2          | 2514972    | 2515981   | 1;3;6;8-tetrahydroxynaphthalene reductase encoding gene | DHN             | Full loss of function | No                          | 132.5 (13dpi)                  | 41.8      | (BUTLER and DAY 1998; LANGFELDER <i>et al.</i> 2003 <sup>2)</sup> ; IPCHO <i>et al.</i> 2012)                                        |
| 18775      | <i>MgSCY1</i> <sup>1)</sup> | 1          | 963695     | 964159    | Syctalone dehydratase encoding gene                     | DHN             | Full loss of function | No                          | 133.1 (8wpi)                   | 15        | (BUTLER and DAY 1998; LANGFELDER <i>et al.</i> 2003 <sup>2)</sup> ; IPCHO <i>et al.</i> 2012)                                        |
| 90337      | <i>SCY2</i> <sup>3)</sup>   | 2          | 133146     | 133741    | Syctalone dehydratase encoding gene                     | DHN             | Full loss of function | No                          | 13.6 (7dpi) *                  | 9.4       | (BUTLER and DAY 1998; LANGFELDER <i>et al.</i> 2003 <sup>2)</sup> ; IPCHO <i>et al.</i> 2012)                                        |
| 87994      | <i>THR1</i> <sup>4)</sup>   | 11         | 604612     | 605471    | 1;3;8-tetrahydroxynaphthalene reductase encoding gene   | DHN             | Full loss of function | No                          | 231.2 (8wpi) *                 | 43.3      | (BUTLER and DAY 1998; LANGFELDER <i>et al.</i> 2003 <sup>2)</sup> ; IPCHO <i>et al.</i> 2012)                                        |
| 35451      | <i>LAC1</i> <sup>5)</sup>   | 2          | 140750     | 142914    | Laccase encoding gene                                   | DHN/DOPA ?      | Reduced               | No                          | 24.3 (7dpi) *                  | 12.4      | (LIN <i>et al.</i> 2012; UPADHYAY <i>et al.</i> 2013)                                                                                |
| 36350      | <i>LAC2</i> <sup>5)</sup>   | 2          | 144093     | 146209    | Laccase encoding gene                                   | DHN/DOPA ?      | Reduced               | No                          | 40.8 (7dpi) *                  | 24.2      | (LIN <i>et al.</i> 2012; UPADHYAY <i>et al.</i> 2013)                                                                                |
| 42222      | <i>LAC3</i> <sup>5)</sup>   | 5          | 2279071    | 2281252   | Laccase encoding gene                                   | DHN/DOPA ?      | Reduced               | No                          | 38.0 (7dpi) *                  | 22        | (LIN <i>et al.</i> 2012; UPADHYAY <i>et al.</i> 2013)                                                                                |

|        |                             |    |         |         |                                                |                |                       |     |                 |      |                                                          |
|--------|-----------------------------|----|---------|---------|------------------------------------------------|----------------|-----------------------|-----|-----------------|------|----------------------------------------------------------|
| 42793  | <i>LAC4</i> <sup>5)</sup>   | 5  | 2282533 | 2284432 | Laccase encoding gene                          | DHN/<br>DOPA ? | Reduced               | No  | 32.6 (7dpi)     | 20.8 | (LIN <i>et al.</i> 2012; UPADHYAY <i>et al.</i> 2013)    |
| 32322  | <i>LAC5</i> <sup>5)</sup>   | 1  | 5292579 | 5294444 | Laccase encoding gene                          | DHN/<br>DOPA ? | Reduced               | No  | 56.7 (7dpi) *   | 37.8 | (LIN <i>et al.</i> 2012; UPADHYAY <i>et al.</i> 2013)    |
| 108040 | <i>LAC6</i> <sup>5)</sup>   | 2  | 1650426 | 1652574 | Laccase encoding gene                          | DHN/<br>DOPA ? | Reduced               | No  | 193.8 (7dpi) *  | 49.5 | (LIN <i>et al.</i> 2012; UPADHYAY <i>et al.</i> 2013)    |
| 38161  | <i>LAC7</i> <sup>5)</sup>   | 3  | 2746686 | 2748706 | Laccase encoding gene                          | DHN/<br>DOPA ? | Reduced               | No  | 7.9 (8wpi)      | 0.6  | (LIN <i>et al.</i> 2012; UPADHYAY <i>et al.</i> 2013)    |
| 109666 | <i>LAC8</i> <sup>5)</sup>   | 5  | 2492745 | 2495149 | Laccase encoding gene                          | DHN/<br>DOPA ? | Reduced               | No  | 451.7 (8wpi) *  | 74.3 | (LIN <i>et al.</i> 2012; UPADHYAY <i>et al.</i> 2013)    |
| 52873  | <i>MgGpa1</i> <sup>1)</sup> | 1  | 2514902 | 2516229 | G alpha protein encoding gene                  | ?              | Hampered              | Yes | 132.5 (13dpi)   | 17.6 | (SOLOMON <i>et al.</i> 2004; MEHRABI <i>et al.</i> 2009) |
| 68892  | <i>MgGpb1</i> <sup>1)</sup> | 2  | 2862220 | 2863783 | G beta protein encoding gene                   | ?              | Hampered              | Yes | 118.2 (13dpi) * | 7.3  | (MEHRABI <i>et al.</i> 2009)                             |
| 76503  | <i>MgGpa3</i> <sup>1)</sup> | 10 | 1111808 | 1113544 | G alpha protein encoding gene                  | ?              | Reduced               | Yes | 33.9 (13dpi)    | 4.9  | (MEHRABI <i>et al.</i> 2009)                             |
| 76502  | <i>MgHog1</i> <sup>1)</sup> | 10 | 1108132 | 1110166 | Mitogen-activated protein kinase encoding gene | ?              | Full loss of function | Yes | 228.6 (7dpi)    | 64.8 | (MEHRABI <i>et al.</i> 2006b)                            |
| 102121 | <i>MgSlt2</i> <sup>1)</sup> | 1  | 1331331 | 1332992 | Mitogen-activated protein kinase encoding gene | ?              | Full loss of function | Yes | 205.4 (13dpi) * | 14.8 | (MEHRABI <i>et al.</i> 2006a)                            |
| 73071  | <i>MgFus3</i> <sup>1)</sup> | 6  | 1182095 | 1184167 | Mitogen-activated protein kinase encoding gene | ?              | Full loss of function | Yes | 163.1 (13dpi) * | 3.9  | (COUSIN <i>et al.</i> 2006)                              |
| 37276  | <i>MVE1</i> <sup>1)</sup>   | 2  | 2995014 | 2995823 | Velvet gene                                    | ?              | Full loss of function | Yes | 123.8 (7dpi)    | 38.1 | (CHOI and GOODWIN 2011b)                                 |
| 47503  | <i>MCC1</i> <sup>1)</sup>   | 9  | 1594202 | 1595191 | C-type cyclin                                  | ?              | Increased             | Yes | 35.5 (13dpi)    | 7    | (CHOI and GOODWIN 2011a)                                 |

| encoding gene |                            |    |         |         |                                            |       |                       |    |                |      |                                                                                                                                                                                                                                                |
|---------------|----------------------------|----|---------|---------|--------------------------------------------|-------|-----------------------|----|----------------|------|------------------------------------------------------------------------------------------------------------------------------------------------------------------------------------------------------------------------------------------------|
| 96591         | <i>PRF1</i> <sup>5)</sup>  | 11 | 584834  | 585795  | Prefoldin chaperone encoding gene          | DHN ? | ?                     | No | 91.4 (8wpi)    | 11   | No Reference, but this is a gene just downstream from 96592 ( <i>PKS1</i> ), thus in the region of the expected DHN melanin pathway cluster. It shows conservation over other fungi and thus is believed to belong to the DHN melanin pathway. |
| 87993         | <i>CMR1</i> <sup>4)</sup>  | 11 | 600309  | 603354  | Transcription factor encoding gene         | DHN ? | Full loss of function | No | 12.7 (8wpi) *  | 1.6  | (ELIAHU <i>et al.</i> 2007)                                                                                                                                                                                                                    |
| 99683         | <i>AYG1</i> <sup>6)</sup>  | 3  | 2737599 | 2739046 | Unknown                                    | DHN   | Reduced               | No | 34.0 (8wpi) *  | 3.4  | (TSAI <i>et al.</i> 1999 <sup>3)</sup> )                                                                                                                                                                                                       |
| 100584        | <i>AYG2</i> <sup>7)</sup>  | 6  | 2057066 | 2058412 | Unknown                                    | DHN   | Reduced               | No | 15.7 (13dpi) * | 0.4  | (TSAI <i>et al.</i> 1999 <sup>3)</sup> )                                                                                                                                                                                                       |
| 72443         | <i>PEX13</i> <sup>8)</sup> | 5  | 1942248 | 1943680 | Peroxisome biogenesis factor encoding gene | ?     | Full loss of function | No | 101.9 (7dpi) * | 40.6 | (FUJIHARA <i>et al.</i> 2010)                                                                                                                                                                                                                  |
| 98537         | <i>PEX6</i> <sup>4)</sup>  | 1  | 3057033 | 3061525 | Peroxisome assembly factor encoding gene   | ?     | Reduced               | No | 21.1 (13dpi)   | 2.2  | (KIMURA <i>et al.</i> 2001)                                                                                                                                                                                                                    |
| 65403         | <i>CLAP1</i> <sup>9)</sup> | 1  | 1543207 | 1547078 | Copper-transporting ATPase encoding gene   | ?     | Reduced               | No | 41.4 (7dpi)    | 12.5 | (PARISOT <i>et al.</i> 2002)                                                                                                                                                                                                                   |
| 57911         | <i>MAC1</i> <sup>10)</sup> | 4  | 1213598 | 1215218 | Transcription factor encoding gene         | ?     | Reduced               | No | 201.6 (7dpi) * | 48.5 | (LIN <i>et al.</i> 2006)                                                                                                                                                                                                                       |

<sup>a</sup> 1) Name as found in the reference literature or on the joint genome institute (JGI) website for *Z. tritici* (<http://genomeportal.jgi-psf.org/Mycgr3/Mycgr3.home.html>). <sup>2)</sup> Name given by us. Similar name given as found in ortholog of *Colletotrichum lagenarium*. <sup>3)</sup> Two syctalone dehydratases (Protein ID: 18775 / 90337) were found when blasting the *SNOG\_11564.3* (Ipcho *et al.* 2012) gene against *Z. tritici*. As 18775 had the name '*MgSCY1*' (JGI), we gave 90337 the name '*SCY2*'. <sup>4)</sup> Same name given as found in ortholog of *Colletotrichum lagenarium*. <sup>5)</sup> Name given by us by abbreviating the enzyme encoded by the gene. <sup>6)</sup> Same name

given as found in ortholog of *Aspergillus fumigatus*. <sup>7)</sup> Name given by us. Similar name given as found in ortholog of *Aspergillus fumigatus*. <sup>8)</sup> Same name given as found in ortholog of *Colletotrichum orbiculare*. <sup>9)</sup> Same name given as found in ortholog of *Colletotrichum lindemuthianum*. <sup>10)</sup> Same name given as found in ortholog of *Cryptococcus neoformans*.

<sup>b</sup> We had chosen a RPKM value of 2 as an expression threshold. All the genes associated with melanization showed  $\geq 2$  RPKM values. Hence all of the orthologs could affect melanization in *Z. tritici*. \* Indicates significant changes in transcript abundances over time.

<sup>c</sup> <sup>1)</sup> Hu, Y., X. Hao, J. Lou, P. Zhang, J. Pan et al., 2012 A PKS gene, pks-1, is involved in chaetoglobosin biosynthesis, pigmentation and sporulation in *Chaetomium globosum*. *Science China-Life Sciences* 55: 1100–1108.

<sup>2)</sup> Langfelder, K., M. Streibel, B. Jahn, G. Haase, and A. A. Brakhage, 2003 Biosynthesis of fungal melanins and their importance for human 11 pathogenic fungi. *Fungal Genet. Biol.* 38: 143–158.

<sup>3)</sup> Tsai, H. F., M. H. Wheeler, Y. C. Chang, and K. J. Kwon-Chung, 1999 A developmentally regulated gene cluster involved in conidial pigment biosynthesis in *Aspergillus fumigatus*. *J. Bacteriol.* 181: 6469–6477.
