# Supplementary material for: Quantitative Trait Locus Mapping of Melanization in the Plant Pathogenic Fungus Zymoseptoria tritici
Source: PubMed Central journal article supplement (PMC4267946; doi:10.1534/g3.114.015289), 2014-10-29
Supplement: supp_g3.114.015289_TableS6.pdf [file supp_g3.114.015289_TableS6.pdf]

**Table S6 Summary of QTL positions and effects for cross 3D1 x 3D7.**

| Environment | Colony age (dpi) | QTL peak marker <sup>a</sup> | Chromosome | Estimated position of peaking marker (cM) | Estimated position of peaking marker (kb) | LOD score at peak | P-value | Mean 1A5 allele (grey values) | Mean 1E4 allele (grey values) | Mean difference | Allele effect <sup>b</sup> | Percentage of variance explained by QTL (%) | Estimated position of proximal marker (kb) <sup>c</sup> | Estimated position of distal marker (kb) <sup>c</sup> | Bayes confidence interval length (kb) |
|-------------|------------------|------------------------------|------------|-------------------------------------------|-------------------------------------------|-------------------|---------|-------------------------------|-------------------------------|-----------------|----------------------------|---------------------------------------------|---------------------------------------------------------|-------------------------------------------------------|---------------------------------------|
| Cold        | 8                | c10.loc107 (p)               | 10         | 107.13                                    | 646                                       | 8.29              | < 0.001 | 135.78                        | 129.09                        | 6.69            | 3D1                        | 13.6                                        | 634                                                     | 673                                                   | 39                                    |
| Cold        | 8                | 12_143193                    | 12         | 5.74                                      | 143                                       | 4.85              | 0.002   | 134.56                        | 129.28                        | 5.27            | 3D1                        | 9.2                                         | 29                                                      | 305                                                   | 276                                   |
| Cold        | 11               | 8_1250811                    | 8          | 140.32                                    | 1251                                      | 4.07              | 0.01    | 101.72                        | 112.39                        | 10.66           | 3D7                        | 7.1                                         | 897                                                     | 2228                                                  | 1332                                  |
| Cold        | 11               | c10.loc108 (p)               | 10         | 108.13                                    | 649                                       | 9.55              | < 0.001 | 116.28                        | 100.17                        | 16.11           | 3D1                        | 15.6                                        | 634                                                     | 673                                                   | 39                                    |
| Cold        | 11               | 11_535446                    | 11         | 77.83                                     | 535                                       | 4.32              | 0.006   | 113.31                        | 102.18                        | 11.13           | 3D1                        | 7.4                                         | 447                                                     | 1332                                                  | 885                                   |
| Control     | 8                | c11.loc82 (p)                | 11         | 82.06                                     | 581                                       | 32.2              | < 0.001 | 118                           | 93.73                         | 24.27           | 3D1                        | 39.2                                        | 560                                                     | 603                                                   | 43                                    |
| Control     | 11               | 5_871061                     | 5          | 157.26                                    | 871                                       | 4.38              | 0.003   | 74.99                         | 85.47                         | 10.48           | 3D7                        | 7.5                                         | 449                                                     | 2799                                                  | 2350                                  |
| Control     | 11               | c11.loc81 (p)                | 11         | 81.06                                     | 571                                       | 30.79             | < 0.001 | 93.62                         | 69.23                         | 24.4            | 3D1                        | 38.2                                        | 549                                                     | 603                                                   | 54                                    |
| Control     | 14               | 5_958098                     | 5          | 160.33                                    | 958                                       | 3.78              | 0.016   | 61.52                         | 69.96                         | 8.43            | 3D7                        | 6.5                                         | 449                                                     | 2799                                                  | 2350                                  |
| Control     | 14               | c11.loc80 (p)                | 11         | 80.06                                     | 560                                       | 21.17             | < 0.001 | 75.79                         | 57.28                         | 18.51           | 3D1                        | 30                                          | 512                                                     | 603                                                   | 91                                    |
| Fungicide   | 8                | c11.loc81 (p)                | 11         | 81.06                                     | 571                                       | 34                | < 0.001 | 124.55                        | 100.17                        | 24.38           | 3D1                        | 45.8                                        | 549                                                     | 592                                                   | 43                                    |
| Fungicide   | 11               | c11.loc82 (p)                | 11         | 82.06                                     | 581                                       | 23.8              | < 0.001 | 96.79                         | 75.05                         | 21.74           | 3D1                        | 30.4                                        | 549                                                     | 625                                                   | 76                                    |
| Fungicide   | 14               | 1_1740191                    | 1          | 193.5                                     | 1740                                      | 3.64              | 0.014   | 64.87                         | 73.03                         | 8.16            | 3D7                        | 6.3                                         | 1063                                                    | 4267                                                  | 3203                                  |
| Fungicide   | 14               | c11.loc81 (p)                | 11         | 81.06                                     | 571                                       | 19.34             | < 0.001 | 78.24                         | 60.96                         | 17.28           | 3D1                        | 27.2                                        | 535                                                     | 614                                                   | 79                                    |

<sup>a</sup> A (p) indicates that a pseudomarker provided the highest LOD score. In all other cases a true marker provided the highest LOD score.

<sup>b</sup> 3D7 indicates that the parental 3D7 allele provided the higher phenotypic mean than the parental 3D1 allele, while 3D1 indicates that the parental 3D1 allele provided the higher phenotypic mean than the parental 3D7 allele.

<sup>c</sup> Markers flanking Bayes confidence interval.
