# Supplementary material for: Quantitative Trait Locus Mapping of Melanization in the Plant Pathogenic Fungus Zymoseptoria tritici
Source: PubMed Central journal article supplement (PMC4267946; doi:10.1534/g3.114.015289), 2014-10-29
Supplement: supp_g3.114.015289_TableS7.pdf [file supp_g3.114.015289_TableS7.pdf]

**Table S7 Summary of QTL positions and effects for cross 1A5 x 1E4.**

| Environment | Colony age (dpi) | QTL peak marker <sup>a</sup> | Chromosome | Estimated position of peaking marker (cM) | Estimated position of peaking marker (kb) | LOD score at peak | P-value | Mean 1A5 allele (grey values) | Mean 1E4 allele (grey values) | Mean difference | Allele effect <sup>b</sup> | Percentage of variance explained by QTL (%) | Estimated position of proximal marker (kb) <sup>c</sup> | Estimated position of distal marker (kb) <sup>c</sup> | Bayes confidence interval length (kb) |
|-------------|------------------|------------------------------|------------|-------------------------------------------|-------------------------------------------|-------------------|---------|-------------------------------|-------------------------------|-----------------|----------------------------|---------------------------------------------|---------------------------------------------------------|-------------------------------------------------------|---------------------------------------|
| Cold        | 8                | 1_2840762                    | 1          | 445.26                                    | 2841                                      | 3.6               | 0.029   | 134.52                        | 138.11                        | 3.58            | 1E4                        | 6.3                                         | 2604                                                    | 3275                                                  | 671                                   |
| Cold        | 8                | c2.loc226 (p)                | 2          | 226.07                                    | 1699                                      | 10                | < 0.001 | 139.11                        | 133.43                        | 5.69            | 1A5                        | 17                                          | 1646                                                    | 1819                                                  | 173                                   |
| Cold        | 8                | c3.loc208 (p)                | 3          | 208.04                                    | 1301                                      | 8.52              | < 0.001 | 133.71                        | 138.79                        | 5.08            | 1E4                        | 12.1                                        | 869                                                     | 1749                                                  | 880                                   |
| Cold        | 11               | 1_1553785                    | 1          | 219.31                                    | 1554                                      | 8.59              | < 0.001 | 103.25                        | 117.72                        | 14.47           | 1E4                        | 14.3                                        | 1020                                                    | 1627                                                  | 607                                   |
| Cold        | 11               | 2_1814469                    | 2          | 243.95                                    | 1814                                      | 3.68              | 0.018   | 114.88                        | 105.17                        | 9.71            | 1A5                        | 6.4                                         | 1428                                                    | 2270                                                  | 842                                   |
| Cold        | 11               | 5_1699464                    | 5          | 224.63                                    | 1699                                      | 5.9               | < 0.001 | 116.26                        | 104.11                        | 12.15           | 1A5                        | 10.1                                        | 773                                                     | 1911                                                  | 1138                                  |
| Cold        | 11               | 8_429575                     | 8          | 58.42                                     | 430                                       | 7.65              | < 0.001 | 117.28                        | 103.6                         | 13.68           | 1A5                        | 12.8                                        | 348                                                     | 446                                                   | 99                                    |
| Cold        | 14               | 1_1028414                    | 1          | 157.63                                    | 1028                                      | 7.65              | < 0.001 | 91.91                         | 105.6                         | 13.69           | 1E4                        | 13                                          | 1014                                                    | 1589                                                  | 575                                   |
| Cold        | 14               | c3.loc249 (p)                | 3          | 249.04                                    | 1780                                      | 3.44              | 0.046   | 103.29                        | 94.17                         | 9.12            | 1A5                        | 5.7                                         | 1621                                                    | 1968                                                  | 347                                   |
| Cold        | 14               | 5_1593047                    | 5          | 215.71                                    | 1593                                      | 5.13              | < 0.001 | 104.07                        | 92.71                         | 11.36           | 1A5                        | 8.9                                         | 1230                                                    | 1913                                                  | 683                                   |
| Cold        | 14               | 7_841106                     | 7          | 181.47                                    | 841                                       | 4.01              | 0.014   | 103.42                        | 93.3                          | 10.13           | 1A5                        | 7                                           | 428                                                     | 1893                                                  | 1464                                  |
| Cold        | 14               | 8_397588                     | 8          | 55.79                                     | 398                                       | 6.62              | < 0.001 | 105.18                        | 92.37                         | 12.81           | 1A5                        | 11.3                                        | 348                                                     | 446                                                   | 99                                    |
| Control     | 8                | c1.loc106 (p)                | 1          | 106.14                                    | 771                                       | 3.4               | 0.037   | 106.6                         | 97.98                         | 8.62            | 1A5                        | 5.8                                         | 441                                                     | 5371                                                  | 4930                                  |
| Control     | 8                | 2_1526778                    | 2          | 205.66                                    | 1527                                      | 7.34              | < 0.001 | 108.31                        | 95.86                         | 12.45           | 1A5                        | 12.3                                        | 1455                                                    | 1646                                                  | 191                                   |
| Control     | 11               | 1_3069693                    | 1          | 492.19                                    | 3070                                      | 6.24              | < 0.001 | 76.24                         | 88.1                          | 11.86           | 1E4                        | 10.9                                        | 2919                                                    | 3249                                                  | 331                                   |
| Control     | 14               | 1_3006378                    | 1          | 480.86                                    | 3006                                      | 5.32              | < 0.001 | 61.69                         | 72.61                         | 10.92           | 1E4                        | 9.2                                         | 2854                                                    | 5652                                                  | 2798                                  |
| Control     | 14               | 3_1739730                    | 3          | 245.64                                    | 1740                                      | 4.29              | 0.005   | 62.41                         | 72.25                         | 9.84            | 1E4                        | 7.5                                         | 1494                                                    | 1968                                                  | 474                                   |
| Control     | 14               | 4_421356                     | 4          | 55.21                                     | 421                                       | 5.61              | < 0.001 | 61.71                         | 72.91                         | 11.2            | 1E4                        | 9.5                                         | 161                                                     | 476                                                   | 315                                   |
| Control     | 14               | 5_1919504                    | 5          | 249.23                                    | 1920                                      | 4.64              | 0.001   | 62.31                         | 72.55                         | 10.24           | 1E4                        | 8                                           | 1385                                                    | 2105                                                  | 721                                   |

|           |    |               |    |        |      |      |         |        |        |       |     |      |      |      |      |
|-----------|----|---------------|----|--------|------|------|---------|--------|--------|-------|-----|------|------|------|------|
| Control   | 14 | 11_523597     | 11 | 66.72  | 524  | 4.71 | < 0.001 | 72.97  | 62.64  | 10.33 | 1A5 | 8.2  | 329  | 581  | 252  |
| Fungicide | 8  | 2_1470426     | 2  | 201.05 | 1470 | 7.55 | < 0.001 | 140.56 | 127.73 | 12.83 | 1A5 | 12.9 | 1464 | 1814 | 350  |
| Fungicide | 8  | c4.loc245 (p) | 4  | 245.04 | 1471 | 7.17 | < 0.001 | 127.64 | 140.17 | 12.53 | 1E4 | 12.3 | 415  | 1802 | 1386 |
| Fungicide | 11 | 1_3249298     | 1  | 511.19 | 3249 | 6.55 | < 0.001 | 108.84 | 124.9  | 16.05 | 1E4 | 11.2 | 2974 | 3275 | 301  |
| Fungicide | 11 | 2_1632971     | 2  | 211.37 | 1633 | 4.01 | 0.011   | 123.66 | 111.06 | 12.6  | 1A5 | 7    | 1428 | 2375 | 947  |
| Fungicide | 11 | 3_1371178     | 3  | 221.45 | 1371 | 4.34 | 0.007   | 111.23 | 124.29 | 13.06 | 1E4 | 7.6  | 1308 | 2180 | 872  |
| Fungicide | 11 | c4.loc52 (p)  | 4  | 52.04  | 418  | 9.15 | < 0.001 | 108.37 | 126.55 | 18.18 | 1E4 | 14.8 | 415  | 1094 | 679  |
| Fungicide | 14 | 1_3249289     | 1  | 511.19 | 3249 | 6.24 | < 0.001 | 93.34  | 109.6  | 16.26 | 1E4 | 10.7 | 2840 | 5735 | 2894 |
| Fungicide | 14 | 2_1632971     | 2  | 211.37 | 1633 | 4.14 | 0.01    | 108.58 | 95.31  | 13.27 | 1A5 | 7.2  | 1428 | 2084 | 657  |
| Fungicide | 14 | 3_1739730     | 3  | 245.64 | 1740 | 4.22 | 0.01    | 95.5   | 108.91 | 13.41 | 1E4 | 7.4  | 1315 | 2206 | 891  |
| Fungicide | 14 | c4.loc54 (p)  | 4  | 54.04  | 420  | 9.47 | < 0.001 | 92.37  | 111.73 | 19.36 | 1E4 | 16.2 | 417  | 426  | 9    |
| Fungicide | 14 | 6_2299166     | 6  | 289.62 | 2299 | 3.56 | 0.027   | 108.33 | 96     | 12.33 | 1A5 | 6.2  | 1166 | 2438 | 1272 |
| Fungicide | 14 | c11.loc70 (p) | 11 | 70.07  | 533  | 4.48 | 0.007   | 109.68 | 96.1   | 13.58 | 1A5 | 7.8  | 271  | 1160 | 889  |

<sup>a</sup> A (p) indicates that a pseudomarker provided the highest LOD score. In all other cases a true marker provided the highest LOD score.

<sup>b</sup> 1E4 indicates that the parental 1E4 allele provided the higher phenotypic mean than the parental 1A5 allele, while 1A5 indicates that the parental 1A5 allele provided the higher phenotypic mean than the parental 1E4 allele.

<sup>c</sup> Markers flanking Bayes confidence interval.
