# Supplementary material for: Quantitative Trait Locus Mapping of Melanization in the Plant Pathogenic Fungus Zymoseptoria tritici
Source: PubMed Central journal article supplement (PMC4267946; doi:10.1534/g3.114.015289), 2014-10-29
Supplement: supp_g3.114.015289_TableS11.pdf [file supp_g3.114.015289_TableS11.pdf]

**Table S11 Genes within large-effect QTL regions (confidence intervals containing ≤ 30 candidate genes) for cross 1A5 x 1E4, excluding genes with no sequence variation or with only synonymous SNPs.**

| Protein ID <sup>a</sup>                    | Gene ontology Name            | Gene ontology biological process                             | Gene ontology cellular component | Gene ontology molecular function                                                                 | Number of Non-Syn SNPs <sup>b</sup> | Number of other sequence variations <sup>b c</sup> | Additional information | Highest RPKM mean <sup>d</sup> | RPKM Stdv |
|--------------------------------------------|-------------------------------|--------------------------------------------------------------|----------------------------------|--------------------------------------------------------------------------------------------------|-------------------------------------|----------------------------------------------------|------------------------|--------------------------------|-----------|
| Chromosome 4 (Phenotype: 14 dpi fungicide) |                               |                                                              |                                  |                                                                                                  |                                     |                                                    |                        |                                |           |
| 92291 # <sup>o</sup>                       | transcription factor activity | regulation of transcription from RNA polymerase II promoter; | nucleus;                         | sequence-specific DNA binding RNA polymerase II transcription factor activity; zinc ion binding; | 0 (M)                               | 4 downstream (m), 1 upstream (m), 2 intron (m)     | /                      | 80.7 (7 dpi)                   | 21.9      |
| Chromosome 8 (Phenotype: 11 dpi cold)      |                               |                                                              |                                  |                                                                                                  |                                     |                                                    |                        |                                |           |
| 94941                                      | Not described                 | Not described                                                | Not described                    | Not described                                                                                    | 0 (M)                               | 4 intron (m)                                       | /                      | 14.7 (13dpi)                   | 4.8       |
| 94942                                      | Not described                 | Not described                                                | Not described                    | Not described                                                                                    | 16 (M)                              | 0                                                  | /                      | 0.2 (8wpi)                     | 0.2       |
| 14031                                      | Not described                 | Not described                                                | Not described                    | Not described                                                                                    | 9 (M)                               | 1 upstream (m)                                     | /                      | 3.2 (13dpi)                    | 1.6       |
| 74422                                      | Not described                 | Not described                                                | Not described                    | Not described                                                                                    | 0 (M)                               | 1 intron (m)                                       | /                      | 33.2 (13dpi)                   | 5.9       |

|        |                                            |                                                                                        |               |                                                           |       |                                   |                                                                                                                                                                                                                                                                                                                                                                   |                             |      |
|--------|--------------------------------------------|----------------------------------------------------------------------------------------|---------------|-----------------------------------------------------------|-------|-----------------------------------|-------------------------------------------------------------------------------------------------------------------------------------------------------------------------------------------------------------------------------------------------------------------------------------------------------------------------------------------------------------------|-----------------------------|------|
| 94946  | Not described                              | Not described                                                                          | Not described | Not described                                             | 7 (M) | 0                                 | /                                                                                                                                                                                                                                                                                                                                                                 | 4.3<br>(13dpi) <sup>□</sup> | 2.9  |
| 100879 | glucose-6-phosphate dehydrogenase activity | pentose-phosphate shunt; response to hydrogen peroxide; glutathione metabolic process; | cytoplasm;    | glucose-6-phosphate dehydrogenase activity; NADP binding; | 0 (M) | 1 downstream (m),<br>2 UTR5 Prime | Name: G6PD (EC 1.1.1.49<br>glucose-6-phosphate dehydrogenase; NADP-glucose-6-phosphate dehydrogenase; Zwischenferment; D-glucose 6-phosphate dehydrogenase; glucose 6-phosphate dehydrogenase (NADP); NADP-dependent glucose 6-phosphate dehydrogenase; 6-phosphoglucose dehydrogenase; Entner-Doudoroff enzyme; glucose-6-phosphate 1-dehydrogenase; G6PDH; GPD) | 623.7<br>(8wpi)             | 33.8 |

|       |                                    |                                                                |                                                  |                                                   |       |                                                              |                                                                                                                                                                                                                                                  |                |       |
|-------|------------------------------------|----------------------------------------------------------------|--------------------------------------------------|---------------------------------------------------|-------|--------------------------------------------------------------|--------------------------------------------------------------------------------------------------------------------------------------------------------------------------------------------------------------------------------------------------|----------------|-------|
| 74429 | structural constituent of ribosome | translation; ribosome biogenesis;                              | ribosome;                                        | structural constituent of ribosome;               | 0 (M) | 2 downstream (m), 1 upstream (m), 2 intron (m), 4 UTR3 Prime | /                                                                                                                                                                                                                                                | 2315.0 (13dpi) | 194.8 |
| 87034 | Not described                      | ribosomal large subunit assembly;                              | nucleolus; preribosome, large subunit precursor; | 5S rRNA binding; rRNA primary transcript binding; | 3 (M) | 0                                                            | /                                                                                                                                                                                                                                                | 58.2 (13dpi)   | 6.8   |
| 87035 | DNA binding                        | transcription, DNA-dependent; response to DNA damage stimulus; | membrane;                                        | DNA binding; ATP binding; helicase activity;      | 1 (M) | 1 downstream (m)                                             | Homolog of <i>Saccharomyces cerevisiae</i> INO80, a Swi2/Snf2-related ATPase that forms a large complex, containing actin and several actin-related proteins, that has chromatin remodeling activity and 3' to 5' DNA helicase activity in vitro | 36.0 (13dpi)   | 6.0   |

|          |                                   |                                                                      |                              |                                                                      |       |                                                   |                                                                                                                                                                  |                           |      |
|----------|-----------------------------------|----------------------------------------------------------------------|------------------------------|----------------------------------------------------------------------|-------|---------------------------------------------------|------------------------------------------------------------------------------------------------------------------------------------------------------------------|---------------------------|------|
| 46572    | Not described                     | Not described                                                        | Not described                | Not described                                                        | 0 (M) | 1 upstream (m), 1 intron (m)                      | /                                                                                                                                                                | 107.2 (7dpi) <sup>□</sup> | 18.9 |
| 27012    | phospholipid biosynthetic process | phospholipid biosynthetic process;                                   | membrane;                    | phosphotransferase activity, for other substituted phosphate groups; | 0 (M) | 2 upstream (m)                                    | Putative CDP-alcohol phosphatidyltransferase. Shows some sequence similarity to cardiolipin synthase. Predicted signal peptide. Predicted membrane localization. | 10.0 (7dpi)               | 5.5  |
| 110344 ° | Not described                     | nuclear mRNA cis splicing, via spliceosome; mRNA transport;          | nuclear cap binding complex; | RNA cap binding;                                                     | 4 (M) | 1 downstream (m), 2 frame shift (H), 1 intron (m) | /                                                                                                                                                                | 48.6 (13dpi) <sup>□</sup> | 5.2  |
| 46635    | nucleus                           | nuclear mRNA splicing, via spliceosome; cellular bud site selection; | U2 snRNP;                    | Not described                                                        | 0 (M) | 2 intron (m)                                      | /                                                                                                                                                                | 69.1 (7dpi)               | 25.6 |

|         |                         | protein                                                              |                | ATP binding;                                           |        |                                | Name: GSK3                                                                         |                            |      |
|---------|-------------------------|----------------------------------------------------------------------|----------------|--------------------------------------------------------|--------|--------------------------------|------------------------------------------------------------------------------------|----------------------------|------|
| 100881  | protein kinase activity | phosphorylation; serine family amino acid metabolic process;         | Not described  | protein serine/threonine kinase activity;              | 0 (M)  | 3 intron (m), 1 UTR5 Prime (m) | (serine/threonine protein kinase, CMGC family, glycogen synthase kinase subfamily) | 180.8 (13dpi) <sup>□</sup> | 51.8 |
| 87038   | Not described           | Not described                                                        | Not described  | nucleotide binding;                                    | 2 (M)  | 0                              | /                                                                                  | 1.1 (7dpi)                 | 1.8  |
| 29926 ° | Not described           | Not described                                                        | Not described  | Not described                                          | 0 (M)  | 1 upstream (m), 6 intron (m)   | /                                                                                  | 31.7 (13dpi) <sup>□</sup>  | 3.2  |
| 74444 ° | tRNA processing         | mitochondrial tRNA wobble uridine modification;                      | mitochondrion; | flavin adenine dinucleotide binding;                   | 10 (M) | 2 intron (m)                   | /                                                                                  | 31.5 (7dpi)                | 9.5  |
| 87039 # | Not described           | Not described                                                        | membrane;      | Not described                                          | 3 (M)  | 0                              | /                                                                                  | 0 (No Specific Day)        | 0    |
| 46302 ° | protein kinase activity | protein phosphorylation; serine family amino acid metabolic process; | Not described  | ATP binding; protein serine/threonine kinase activity; | 4 (M)  | 4 downstream (m), 2 intron (m) | /                                                                                  | 21.6 (13dpi)               | 2.0  |

|          |                      |                        |               |                                              |       |                                 |                                                                                        |                          |     |
|----------|----------------------|------------------------|---------------|----------------------------------------------|-------|---------------------------------|----------------------------------------------------------------------------------------|--------------------------|-----|
| 110348 ° | nucleic acid binding | DNA catabolic process; | Not described | endonuclease activity; nucleic acid binding; | 7 (M) | 0                               | /                                                                                      | 4.5 (7dpi)               | 4.5 |
| 94962 °  | Not described        | Not described          | Not described | Not described                                | 3 (M) | 0                               | /                                                                                      | 13.0 (7dpi) <sup>□</sup> | 7.7 |
| 110349 ° | Not described        | Not described          | Not described | Not described                                | 9 (M) | 3 frame shift (H), 3 intron (m) | putative secreted protein unknown function, probable unique to <i>M. graminicola</i> . | 11.8 (7dpi)              | 8.3 |

<sup>a</sup> A # Indicates the QTL peak is positioned closest to this gene or within the gene. A ° Indicates candidate genes with a higher priority of contributing to melanization compared to unmarked candidate genes. <sup>§</sup> Indicates orthologs in *Z. tritici* to genes involved in melanin biosynthesis (Table S5).

<sup>b</sup> The letter within brackets following the number of a specific sequence polymorphism refers to the likely impact of the sequence polymorphism according to SnpEff. H=high, M=moderate, L=low, m=modifier.

<sup>c</sup> Other sequence variations include codon change plus insertion/deletion, codon insertion/deletions, 100 bp upstream or downstream, frame shift, intron, splice site acceptor/donor, start gained/lost, stop gained/lost, untranslated regions (UTR).

<sup>d</sup> We chose a RKPM value of 2 as an expression threshold. <sup>□</sup>A <sup>□</sup>Indicates significant changes in transcript abundances over time.
